# Supplementary material for: Organization of the extracellular portion of the macrophage galactose receptor: A trimeric cluster of simple binding sites for N-acetylgalactosamine
Source: PubMed Central journal article supplement — Glycobiology. 2013 Mar 18;23(7):853–64. doi: 10.1093/glycob/cwt022 (PMC3671775; doi:10.1093/glycob/cwt022), 2013-03-18
Supplement: supp_cwt022_cwt022supp.pdf [file supp_cwt022_cwt022supp.pdf]

**Supplemental Table 1. Binding of MGL to synthetic glycan array version 5.1 from the Consortium for Functional Glycomics**

| <b>Glycan number</b> | <b>Rank order at 1 µg/ml</b>                                                         | <b>Average RFU</b> | <b>Standard deviation</b> |
|----------------------|--------------------------------------------------------------------------------------|--------------------|---------------------------|
| 131                  | Galb1-4GlcNAcb1-6GalNAca-Sp8                                                         | 1189               | 64                        |
| 494                  | Fuca1-2Galb1-4GlcNAcb1-6GalNAca-Sp14                                                 | 743                | 62                        |
| 519                  | GalNAca1-3(Fuca1-2)Galb1-4GlcNAcb1-6GalNAc-Sp14                                      | 730                | 51                        |
| 193                  | GlcNAcb1-6GalNAca-Sp14                                                               | 711                | 19                        |
| 192                  | GlcNAcb1-6GalNAca-Sp8                                                                | 605                | 303                       |
| 408                  | GalNAcb1-3Gala1-6Galb1-4Glc-Sp8                                                      | 556                | 10                        |
| 528                  | GalNAcb1-4GlcNAcb1-2Mana-Sp0                                                         | 555                | 36                        |
| 562                  | GalNAcb1-3GlcNAcb-Sp0                                                                | 538                | 14                        |
| 495                  | Gala1-3Galb1-4GlcNAcb1-6GalNAca-Sp14                                                 | 510                | 28                        |
| 491                  | Neu5Aca2-3Galb1-3GlcNAcb1-6GalNAca-Sp14                                              | 508                | 98                        |
| 306                  | GalNAcb1-3Galb-Sp8                                                                   | 492                | 21                        |
| 489                  | Gala1-3Galb1-3GlcNAcb1-6GalNAca-Sp14                                                 | 489                | 30                        |
| 4                    | GalNAca-Sp8                                                                          | 484                | 52                        |
| 92                   | GalNAca1-3Galb-Sp8                                                                   | 469                | 15                        |
| 95                   | GalNAcb1-3(Fuca1-2)Galb-Sp8                                                          | 458                | 92                        |
| 479                  | Neu5Aca2-3Galb1-4GlcNAcb1-6GalNAca-Sp14                                              | 449                | 15                        |
| 132                  | Galb1-4GlcNAcb1-6GalNAc-Sp14                                                         | 441                | 17                        |
| 93                   | GalNAca1-4(Fuca1-2)Galb1-4GlcNAcb-Sp8                                                | 424                | 69                        |
| 97                   | GalNAcb1-4(Fuca1-3)GlcNAcb-Sp0                                                       | 424                | 100                       |
| 506                  | GalNAca1-3(Fuca1-2)Galb1-3GlcNAcb1-6GalNAca-Sp14                                     | 423                | 24                        |
| 7                    | Fuca-Sp9                                                                             | 417                | 113                       |
| 15                   | GalNAcb-Sp8                                                                          | 375                | 54                        |
| 334                  | GalNAcb1-3Gala1-4Galb1-4GlcNAcb1-3Galb1-4Glc-Sp0                                     | 361                | 30                        |
| 563                  | GalNAcb1-4GlcNAcb1-3GalNAcb1-4GlcNAcb-Sp0                                            | 351                | 14                        |
| 512                  | (6S)GalNAcb1-4GlcNAc-Sp8                                                             | 306                | 73                        |
| 525                  | Gala1-3(Fuca1-2)Galb1-3GlcNAcb1-6GalNAc-Sp14                                         | 290                | 89                        |
| 99                   | GalNAcb1-4GlcNAcb-Sp8                                                                | 264                | 47                        |
| 503                  | GalNAcb1-4(Fuca1-3)(6S)GlcNAcb-Sp8                                                   | 250                | 34                        |
| 98                   | GalNAcb1-4GlcNAcb-Sp0                                                                | 248                | 45                        |
| 96                   | GalNAcb1-3Gala1-4Galb1-4GlcNAcb-Sp0                                                  | 247                | 65                        |
| 5                    | GalNAca-Sp15                                                                         | 246                | 54                        |
| 488                  | Galb1-3GlcNAcb1-6GalNAca-Sp14                                                        | 219                | 46                        |
| 265                  | Neu5Aca2-6GalNAca-Sp8                                                                | 215                | 54                        |
| 266                  | Neu5Aca2-6GalNAcb1-4GlcNAcb-Sp0                                                      | 205                | 7                         |
| 228                  | GalNAcb1-4(Neu5Aca2-8Neu5Aca2-3)Galb1-4Glc-Sp0                                       | 205                | 16                        |
| 514                  | GalNAcb1-4(6S)GlcNAc-Sp8                                                             | 191                | 75                        |
| 285                  | Neu5Gca2-6GalNAca-Sp0                                                                | 185                | 26                        |
| 225                  | GalNAcb1-4(Neu5Aca2-8Neu5Aca2-8Neu5Aca2-3)Galb1-4Glc-Sp0                             | 155                | 28                        |
| 226                  | GalNAcb1-4(Neu5Aca2-8Neu5Aca2-8Neu5Aca2-3)Galb1-4Glc-Sp0                             | 130                | 10                        |
| 94                   | GalNAcb1-3GalNAca-Sp8                                                                | 104                | 20                        |
| 490                  | Galb1-3(Fuca1-4)GlcNAcb1-6GalNAca-Sp14                                               | 100                | 8                         |
| 233                  | GalNAcb1-4(Neu5Aca2-3)Galb1-4Glc-Sp0                                                 | 92                 | 28                        |
| 379                  | GalNAcb1-4GlcNAcb1-2Mana1-6(GalNAcb1-4GlcNAcb1-2Mana1-3)Manb1-4GlcNAcb1-4GlcNAc-Sp12 | 84                 | 20                        |
| 86                   | GalNAca1-3(Fuca1-2)Galb1-4GlcNAcb-Sp8                                                | 76                 | 9                         |
| 90                   | GalNAca1-3(Fuca1-2)Galb-Sp18                                                         | 73                 | 36                        |
| 144                  | Galb1-3GalNAcb1-4(Neu5Aca2-3)Galb1-4Glc-Sp0                                          | 72                 | 3                         |

|     |                                                                                                                                                                                                                                                                                                                          |    |    |
|-----|--------------------------------------------------------------------------------------------------------------------------------------------------------------------------------------------------------------------------------------------------------------------------------------------------------------------------|----|----|
| 232 | GalNAcb1-4(Neu5Aca2-3)Galb1-4GlcNAcb-Sp8                                                                                                                                                                                                                                                                                 | 62 | 12 |
| 447 | Galb1-4(Fuca1-3)GlcNAcb1-6GalNAc-Sp14                                                                                                                                                                                                                                                                                    | 54 | 17 |
| 91  | GalNAca1-3GalNAcb-Sp8                                                                                                                                                                                                                                                                                                    | 52 | 10 |
| 143 | Galb1-3GalNAcb1-3Gala1-4Galb1-4Glc-Sp0                                                                                                                                                                                                                                                                                   | 51 | 5  |
| 370 | GalNAca1-3(Fuca1-2)Galb1-4GlcNAcb1-2Mana1-6(GalNAca1-3(Fuca1-2)Galb1-4GlcNAcb1-2Mana1-3)Manb1-4GlcNAcb1-4GlcNAcb-Sp20                                                                                                                                                                                                    | 48 | 6  |
| 231 | GalNAcb1-4(Neu5Aca2-3)Galb1-4GlcNAcb-Sp0                                                                                                                                                                                                                                                                                 | 39 | 10 |
| 82  | GalNAca1-3(Fuca1-2)Galb1-3GlcNAcb-Sp0                                                                                                                                                                                                                                                                                    | 34 | 10 |
| 63  | Fuca1-2Galb1-3GalNAcb1-4(Neu5Aca2-3)Galb1-4Glc-Sp0                                                                                                                                                                                                                                                                       | 32 | 9  |
| 282 | Neu5Gca2-3Galb1-4(Fuca1-3)GlcNAcb-Sp0                                                                                                                                                                                                                                                                                    | 30 | 3  |
| 415 | GalNAca1-3GalNAcb1-3Gala1-4Galb1-4Glc-Sp0                                                                                                                                                                                                                                                                                | 28 | 8  |
| 411 | Galb1-3GalNAcb1-4(Neu5Aca2-8Neu5Aca2-3)Galb1-4Glc-Sp0                                                                                                                                                                                                                                                                    | 26 | 7  |
| 89  | GalNAca1-3(Fuca1-2)Galb-Sp8                                                                                                                                                                                                                                                                                              | 25 | 4  |
| 166 | Galb1-4GlcNAcb1-6(Galb1-3)GalNAca-Sp8                                                                                                                                                                                                                                                                                    | 25 | 6  |
| 572 | Galb1-3GlcNAcb1-3Galb1-4GlcNAcb1-6(Galb1-3GlcNAcb1-3Galb1-4GlcNAcb1-2)Mana1-6(Galb1-3GlcNAcb1-3Galb1-4GlcNAcb1-2Mana1-3)Manb1-4GlcNAcb1-4(Fuca1-6)GlcNAcb-Sp24                                                                                                                                                           | 24 | 6  |
| 373 | GalNAca1-3(Fuca1-2)Galb1-3GlcNAcb1-2Mana1-6(GalNAca1-3(Fuca1-2)Galb1-3GlcNAcb1-2Mana1-3)Manb1-4GlcNAcb1-4GlcNAcb-Sp20                                                                                                                                                                                                    | 23 | 10 |
| 559 | Galb1-4GlcNAcb1-3Galb1-4GlcNAcb1-6(Galb1-4GlcNAcb1-3Galb1-4GlcNAcb1-2)Mana1-6(Galb1-4GlcNAcb1-3Galb1-4GlcNAcb1-2Mana1-3)Mana1-4GlcNAcb1-4GlcNAc-Sp24                                                                                                                                                                     | 20 | 4  |
| 336 | GalNAca1-3(Fuca1-2)Galb1-4GlcNAcb1-3Galb1-4GlcNAcb1-3Galb1-4GlcNAcb-Sp0                                                                                                                                                                                                                                                  | 19 | 9  |
| 335 | GalNAca1-3(Fuca1-2)Galb1-4GlcNAcb1-3Galb1-4GlcNAcb-Sp0                                                                                                                                                                                                                                                                   | 18 | 9  |
| 583 | GlcNAcb1-3Galb1-4GlcNAcb1-3Galb1-4GlcNAcb1-6(GlcNAcb1-3Galb1-4GlcNAcb1-3Galb1-4GlcNAcb1-2)Mana1-6(GlcNAcb1-3Galb1-4GlcNAcb1-3Galb1-4GlcNAcb1-2Mana1-3)Manb1-4GlcNAcb1-4(Fuca1-6)GlcNAcb-Sp24                                                                                                                             | 17 | 6  |
| 588 | Galb1-4GlcNAcb1-3Galb1-4GlcNAcb1-3Galb1-4GlcNAcb1-3Galb1-4GlcNAcb1-3Galb1-4GlcNAcb1-6(Galb1-4GlcNAcb1-3Galb1-4GlcNAcb1-3Galb1-4GlcNAcb1-3Galb1-4GlcNAcb1-3Galb1-4GlcNAcb1-3Galb1-4GlcNAcb1-2)Mana1-6(Galb1-4GlcNAcb1-3Galb1-4GlcNAcb1-3Galb1-4GlcNAcb1-3Galb1-4GlcNAcb1-2)Mana1-3)Manb1-4GlcNAcb1-4(Fuca1-6)GlcNAcb-Sp24 | 17 | 2  |
| 402 | GalNAca1-3GalNAcb1-3Gala1-4Galb1-4GlcNAcb-Sp0                                                                                                                                                                                                                                                                            | 16 | 10 |
| 587 | GlcNAcb1-3Galb1-4GlcNAcb1-3Galb1-4GlcNAcb1-3Galb1-4GlcNAcb1-6(GlcNAcb1-3Galb1-4GlcNAcb1-3Galb1-4GlcNAcb1-3Galb1-4GlcNAcb1-3Galb1-4GlcNAcb1-3Galb1-4GlcNAcb1-2)Mana1-6(GlcNAcb1-3Galb1-4GlcNAcb1-3Galb1-4GlcNAcb1-3Galb1-4GlcNAcb1-2)Mana1-3)Manb1-4GlcNAcb1-4(Fuca1-6)GlcNAcb-Sp24                                       | 16 | 5  |
| 109 | Gala1-4(Gala1-3)Galb1-4GlcNAcb-Sp8                                                                                                                                                                                                                                                                                       | 15 | 6  |
| 263 | Neu5Aca2-3Galb1-4Glc-Sp0                                                                                                                                                                                                                                                                                                 | 15 | 3  |
| 173 | GlcNAca1-3Galb1-4GlcNAcb-Sp8                                                                                                                                                                                                                                                                                             | 14 | 7  |
| 362 | Fuca1-2Galb1-4(Fuca1-3)GlcNAcb1-2Mana1-6(Fuca1-2Galb1-4(Fuca1-3)GlcNAcb1-2Mana1-3)Manb1-4GlcNAcb1-4GlcNAcb-Sp20                                                                                                                                                                                                          | 14 | 4  |
| 392 | GalNAcb1-4(Neu5Aca2-3)Galb1-4GlcNAcb1-3GalNAca-Sp14                                                                                                                                                                                                                                                                      | 14 | 4  |
| 585 | GlcNAcb1-3Galb1-4GlcNAcb1-3Galb1-4GlcNAcb1-6(GlcNAcb1-3Galb1-4GlcNAcb1-3Galb1-4GlcNAcb1-3Galb1-4GlcNAcb1-2)Mana1-6(GlcNAcb1-3Galb1-4GlcNAcb1-3Galb1-4GlcNAcb1-3Galb1-4GlcNAcb1-2)Mana1-3)Manb1-4GlcNAcb1-4(Fuca1-6)GlcNAcb-Sp24                                                                                          | 13 | 4  |
| 57  | Neu5Aca2-6Galb1-4GlcNAcb1-2Mana1-6(Neu5Aca2-6Galb1-4GlcNAcb1-2)Mana1-3)Manb1-4GlcNAcb1-4GlcNAcb-Sp24                                                                                                                                                                                                                     | 13 | 6  |
| 582 | Galb1-4GlcNAcb1-3Galb1-4GlcNAcb1-6(Galb1-4GlcNAcb1-3Galb1-4GlcNAcb1-2)Mana1-6(Galb1-4GlcNAcb1-3Galb1-4GlcNAcb1-2)Mana1-3)Manb1-4GlcNAcb1-4(Fuca1-6)GlcNAcb-Sp24                                                                                                                                                          | 13 | 4  |
| 87  | GalNAca1-3(Fuca1-2)Galb1-4Glc-Sp0                                                                                                                                                                                                                                                                                        | 12 | 5  |
| 577 | Galb1-4GlcNAcb1-3Galb1-4GlcNAcb1-3Galb1-4GlcNAcb1-2)Mana1-6(Galb1-4GlcNAcb1-3Galb1-4GlcNAcb1-3Galb1-4GlcNAcb1-2)Mana1-3)Manb1-4GlcNAcb1-4(Fuca1-6)GlcNAcb-Sp24                                                                                                                                                           | 12 | 6  |
| 581 | Galb1-4GlcNAcb1-3Galb1-4GlcNAcb1-3Galb1-4GlcNAcb1-3Galb1-4GlcNAcb1-2)Mana1-6(Galb1-4GlcNAcb1-3Galb1-4GlcNAcb1-3Galb1-4GlcNAcb1-3Galb1-4GlcNAcb1-3Galb1-4GlcNAcb1-2)Mana1-3)Manb1-4GlcNAcb1-4(Fuca1-6)GlcNAcb-Sp19                                                                                                        | 12 | 5  |
| 536 | GalNAca1-3(Fuca1-2)Galb1-3GalNAcb1-3Gala1-4Galb1-4Glc-Sp21                                                                                                                                                                                                                                                               | 12 | 7  |
| 324 | Galb1-3GlcNAcb1-2)Mana1-6(Galb1-3GlcNAcb1-2)Mana1-3)Manb1-4GlcNAcb1-4GlcNAcb-Sp19                                                                                                                                                                                                                                        | 12 | 2  |
| 24  | (3S)Galb1-4(Fuca1-3)(6S)Glc-Sp0                                                                                                                                                                                                                                                                                          | 12 | 3  |
| 549 | GlcNAcb1-3Galb1-4GlcNAcb1-3Galb1-4GlcNAcb1-2)Mana1-6(GlcNAcb1-3Galb1-4GlcNAcb1-3Galb1-4GlcNAcb1-3Galb1-4GlcNAcb1-3Galb1-4GlcNAcb1-2)Mana1-3)Manb1-4GlcNAcb1-4GlcNAcb-Sp25                                                                                                                                                | 12 | 6  |
| 332 | Neu5Aca2-6Galb1-4GlcNAcb1-3Galb1-4GlcNAcb1-3Galb1-4GlcNAcb-Sp0                                                                                                                                                                                                                                                           | 11 | 2  |
| 395 | Gala1-3Galb1-3(Fuca1-4)GlcNAcb1-2)Mana1-6(Gala1-3Galb1-3(Fuca1-4)GlcNAcb1-2)Mana1-3)Manb1-4GlcNAcb1-4GlcNAc-Sp19                                                                                                                                                                                                         | 11 | 7  |
| 493 | Galb1-4(Fuca1-3)GlcNAcb1-6(Neu5Aca2-6(Neu5Aca2-3Galb1-3)GlcNAcb1-3)Galb1-4Glc-Sp21                                                                                                                                                                                                                                       | 11 | 3  |
| 121 | Gala1-4Galb1-4GlcNAcb-Sp8                                                                                                                                                                                                                                                                                                | 11 | 4  |
| 240 | Neu5Aca2-3Galb1-3(Fuca1-4)GlcNAcb1-3Galb1-4(Fuca1-3)GlcNAcb-Sp0                                                                                                                                                                                                                                                          | 11 | 3  |



|     |                                                                                                                                                                                                                         |   |    |
|-----|-------------------------------------------------------------------------------------------------------------------------------------------------------------------------------------------------------------------------|---|----|
| 153 | Galb1-4(Fuca1-3)GlcNAcb1-3Galb1-4(Fuca1-3)GlcNAcb-Sp0                                                                                                                                                                   | 8 | 4  |
| 527 | Gala1-3Galb1-3GlcNAcb1-2Mana-Sp0                                                                                                                                                                                        | 7 | 2  |
| 483 | Neu5Aca2-3Galb1-4GlcNAcb1-2Mana1-6(Neu5Aca2-3Galb1-4GlcNAcb1-2Mana1-3)Manb1-4GlcNAcb1-4(Fuca1-6)GlcNAcb-Sp24                                                                                                            | 7 | 4  |
| 463 | Neu5Aca2-6Galb1-4GlcNAcb1-2Mana1-6(GlcNAcb1-4)(Neu5Aca2-6Galb1-4GlcNAcb1-2Mana1-3)Manb1-4GlcNAcb1-4GlcNAcb-Sp21                                                                                                         | 7 | 3  |
| 129 | Galb1-3(Fuca1-4)GlcNAc-Sp8                                                                                                                                                                                              | 7 | 2  |
| 446 | Fuca1-2Galb1-4(Fuca1-3)GlcNAcb1-2Mana1-6(Fuca1-2Galb1-4(Fuca1-3)GlcNAcb1-4(Fuca1-2Galb1-4(Fuca1-3)GlcNAcb1-2)Mana1-3)Manb1-4GlcNAcb1-4GlcNAcb-Sp12                                                                      | 7 | 6  |
| 576 | GlcNAcb1-3Galb1-4GlcNAcb1-3Galb1-4GlcNAcb1-2Mana1-6(GlcNAcb1-3Galb1-4GlcNAcb1-3Galb1-4GlcNAcb1-2Mana1-3)Manb1-4GlcNAcb1-4(Fuca1-6)GlcNAcb-Sp24                                                                          | 7 | 4  |
| 116 | Gala1-3Galb1-4Glc-Sp0                                                                                                                                                                                                   | 7 | 2  |
| 33  | (3S)Galb1-4(Fuca1-3)GlcNAc-Sp8                                                                                                                                                                                          | 7 | 1  |
| 118 | Gala1-3Galb-Sp8                                                                                                                                                                                                         | 7 | 5  |
| 424 | GalNAca1-3(Fuca1-2)Galb1-3GlcNAcb1-3GalNAc-Sp14                                                                                                                                                                         | 7 | 7  |
| 171 | Galb1-4Glc-Sp0                                                                                                                                                                                                          | 7 | 5  |
| 184 | GlcNAcb1-3Galb1-4GlcNAcb1-3Galb1-4GlcNAcb-Sp0                                                                                                                                                                           | 7 | 6  |
| 515 | (3S)GalNAcb1-4GlcNAc-Sp8                                                                                                                                                                                                | 7 | 4  |
| 274 | Neu5Aca2-6Galb-Sp8                                                                                                                                                                                                      | 7 | 7  |
| 297 | (6S)Galb1-4(6S)GlcNAcb-Sp0                                                                                                                                                                                              | 7 | 2  |
| 101 | Gala1-3(Fuca1-2)Galb1-3GlcNAcb-Sp0                                                                                                                                                                                      | 7 | 5  |
| 343 | GlcNAca1-4Galb1-4GlcNAcb1-3Galb1-4GlcNAcb-Sp0                                                                                                                                                                           | 7 | 6  |
| 368 | Galb1-4(Fuca1-3)GlcNAcb1-6(Fuca1-2Galb1-4GlcNAcb1-3)Galb1-4Glc-Sp21                                                                                                                                                     | 7 | 4  |
| 404 | Gala1-4Galb1-4GlcNAcb1-2Mana1-6(Gala1-4Galb1-4GlcNAcb1-2Mana1-3)Manb1-4GlcNAcb1-4GlcNAcb-Sp24                                                                                                                           | 7 | 4  |
| 312 | MurNAcb1-4GlcNAcb-Sp10                                                                                                                                                                                                  | 7 | 4  |
| 137 | Neu5Acb2-6(Galb1-3)GalNAca-Sp8                                                                                                                                                                                          | 7 | 6  |
| 190 | GlcNAcb1-4GlcNAcb1-4GlcNAcb1-4GlcNAcb1-4GlcNAcb1-Sp8                                                                                                                                                                    | 7 | 4  |
| 453 | GalNAcb1-4Galb1-4Glc-Sp0                                                                                                                                                                                                | 7 | 4  |
| 119 | Gala1-4(Fuca1-2)Galb1-4GlcNAcb-Sp8                                                                                                                                                                                      | 7 | 2  |
| 474 | Neu5Aca2-3Galb1-3GlcNAcb1-6(Neu5Aca2-3Galb1-3GlcNAcb1-2)Mana1-6(Neu5Aca2-3Galb1-3GlcNAcb1-2Mana1-3)Manb1-4GlcNAcb1-4GlcNAcb-Sp19                                                                                        | 7 | 4  |
| 27  | (3S)Galb1-4(6S)Glc-Sp8                                                                                                                                                                                                  | 7 | 6  |
| 152 | Galb1-4(Fuca1-3)GlcNAcb-Sp8                                                                                                                                                                                             | 7 | 2  |
| 275 | Neu5Aca2-8Neu5Aca-Sp8                                                                                                                                                                                                   | 7 | 6  |
| 178 | GlcNAcb1-6(GlcNAcb1-3)Galb1-4GlcNAcb-Sp8                                                                                                                                                                                | 7 | 3  |
| 208 | Mana1-2Mana1-6(Mana1-2Mana1-3)Mana-Sp9                                                                                                                                                                                  | 7 | 2  |
| 552 | Neu5Gca2-8Neu5Gca2-3Galb1-4GlcNAc-Sp0                                                                                                                                                                                   | 7 | 5  |
| 348 | Neu5Aca2-6Galb1-4GlcNAcb1-2Mana1-3Manb1-4GlcNAcb1-4GlcNAc-Sp12                                                                                                                                                          | 6 | 5  |
| 88  | GlcNAcb1-3Galb1-3GalNAca-Sp8                                                                                                                                                                                            | 6 | 6  |
| 459 | Neu5Aca2-3Galb1-4GlcNAcb1-2Mana1-6(GlcNAcb1-4)(Neu5Aca2-3Galb1-4GlcNAcb1-2Mana1-3)Manb1-4GlcNAcb1-4GlcNAcb-Sp21                                                                                                         | 6 | 2  |
| 579 | Galb1-4GlcNAcb1-3Galb1-4GlcNAcb1-3Galb1-4GlcNAcb1-2Mana1-6(Galb1-4GlcNAcb1-3Galb1-4GlcNAcb1-3Galb1-4GlcNAcb1-3Galb1-4GlcNAcb1-2Mana1-3)Manb1-4GlcNAcb1-4(Fuca1-6)GlcNAcb-Sp24                                           | 6 | 9  |
| 366 | Neu5Aca2-6GlcNAcb1-4GlcNAc-Sp21                                                                                                                                                                                         | 6 | 2  |
| 565 | Galb1-4GlcNAcb1-3Galb1-4GlcNAcb1-3Galb1-4GlcNAcb1-3Galb1-4GlcNAcb1-2Mana1-6(Galb1-4GlcNAcb1-3Galb1-4GlcNAcb1-3Galb1-4GlcNAcb1-3Galb1-4GlcNAcb1-3Galb1-4GlcNAcb1-3Galb1-4GlcNAcb1-2Mana1-3)Manb1-4GlcNAcb1-4GlcNAcb-Sp25 | 6 | 3  |
| 420 | Fuca1-2Galb1-4GlcNAcb1-2Mana1-6(Fuca1-2Galb1-4GlcNAcb1-2Mana1-3)Manb1-4GlcNAcb1-4(Fuca1-6)GlcNAcb-Sp22                                                                                                                  | 6 | 4  |
| 244 | Neu5Aca2-6(Neu5Aca2-3Galb1-3)GalNAca-Sp14                                                                                                                                                                               | 6 | 4  |
| 325 | Neu5Aca2-3Galb1-4GlcNAcb1-2Mana1-6(Neu5Aca2-3Galb1-4GlcNAcb1-2Mana1-3)Manb1-4GlcNAcb1-4GlcNAcb-Sp12                                                                                                                     | 6 | 5  |
| 105 | Gala1-3(Fuca1-2)Galb1-4GlcNAc-Sp0                                                                                                                                                                                       | 6 | 10 |
| 120 | Gala1-4Galb1-4GlcNAcb-Sp0                                                                                                                                                                                               | 6 | 8  |
| 16  | GlcNAcb-Sp0                                                                                                                                                                                                             | 6 | 7  |
| 114 | Gala1-3Galb1-3GlcNAcb-Sp0                                                                                                                                                                                               | 6 | 3  |
| 102 | Gala1-3(Fuca1-2)Galb1-3GlcNAcb-Sp8                                                                                                                                                                                      | 6 | 6  |
| 48  | Neu5,9Ac2a-Sp8                                                                                                                                                                                                          | 6 | 6  |
| 610 | Galb1-3GalNAcb1-4(Neu5Aca2-8Neu5Aca2-8Neu5Aca2-3)Galb1-4Glc-Sp21                                                                                                                                                        | 6 | 5  |

|     |                                                                                                                                                                         |   |   |
|-----|-------------------------------------------------------------------------------------------------------------------------------------------------------------------------|---|---|
| 107 | Gala1-3(Fuca1-2)Galb-Sp8                                                                                                                                                | 6 | 1 |
| 309 | GlcNAcb1-3Man-Sp10                                                                                                                                                      | 6 | 4 |
| 361 | Fuca1-2Galb1-4GlcNAcb1-2Mana1-6(Fuca1-2Galb1-4GlcNAcb1-2Mana1-3)Manb1-4GlcNAcb1-4GlcNAcb-Sp20                                                                           | 6 | 3 |
| 39  | (6S)(4S)Galb1-4GlcNAcb-Sp0                                                                                                                                              | 6 | 4 |
| 606 | Neu5Aca2-6Galb1-4GlcNAcb1-3Galb1-4GlcNAcb1-3Galb1-4GlcNAcb1-2Mana1-6(Neu5Aca2-6Galb1-4GlcNAcb1-3Galb1-4GlcNAcb1-3Galb1-4GlcNAcb1-2Mana1-3)Manb1-4GlcNAcb1-4GlcNAcb-Sp12 | 6 | 2 |
| 162 | Galb1-4GlcNAcb1-3Galb1-4GlcNAcb1-3Galb1-4GlcNAcb-Sp0                                                                                                                    | 6 | 4 |
| 607 | Neu5Aca2-3Galb1-4GlcNAcb1-3Galb1-4GlcNAcb1-2Mana1-6(Neu5Aca2-3Galb1-4GlcNAcb1-3Galb1-4GlcNAcb1-3Galb1-4GlcNAcb1-2Mana1-3)Manb1-4GlcNAcb1-4GlcNAcb-Sp12                  | 6 | 3 |
| 187 | GlcNAcb1-6(GlcNAcb1-4)GalNAca-Sp8                                                                                                                                       | 6 | 5 |
| 365 | Fuca1-4(Galb1-3)GlcNAcb1-2Mana1-6(Fuca1-4(Galb1-3)GlcNAcb1-2Mana1-3)Manb1-4GlcNAcb1-4(Fuca1-6)GlcNAcb-Sp22                                                              | 6 | 2 |
| 34  | (3S)Galb1-4(6S)GlcNAcb-Sp0                                                                                                                                              | 6 | 5 |
| 284 | Neu5Gca2-3Galb1-4Glc-Sp0                                                                                                                                                | 6 | 3 |
| 308 | Neu5Aca2-6Galb1-4GlcNAcb1-2Mana1-6(GlcNAcb1-2Mana1-3)Manb1-4GlcNAcb1-4GlcNAcb-Sp12                                                                                      | 6 | 3 |
| 359 | KDNa2-3Galb1-3GalNAca-Sp14                                                                                                                                              | 6 | 9 |
| 108 | Gala1-3(Fuca1-2)Galb-Sp18                                                                                                                                               | 6 | 2 |
| 316 | Mana1-2Mana1-6(Mana1-2Mana1-3)Mana1-6(Mana1-2Mana1-2Mana1-3)Mana-Sp9                                                                                                    | 6 | 5 |
| 248 | Fuca1-2(6S)Galb1-4Glc-Sp0                                                                                                                                               | 5 | 5 |
| 288 | Neu5Aca2-3Galb1-4GlcNAcb1-6(Galb1-3)GalNAca-Sp14                                                                                                                        | 5 | 5 |
| 398 | Galb1-4GlcNAcb1-2Mana1-6(GlcNAcb1-2Mana1-3)Manb1-4GlcNAcb1-4GlcNAcb-Sp12                                                                                                | 5 | 5 |
| 321 | Neu5Aca2-8Neu5Ac-Sp17                                                                                                                                                   | 5 | 4 |
| 298 | (6P)Glc-Sp10                                                                                                                                                            | 5 | 2 |
| 480 | Neu5Aca2-6Galb1-4GlcNAcb1-6GalNAca-Sp14                                                                                                                                 | 5 | 4 |
| 540 | GlcNAcb1-3Galb1-4GlcNAcb1-2Mana1-6(GlcNAcb1-3Galb1-4GlcNAcb1-2Mana1-3)Manb1-4GlcNAcb1-4GlcNAcb-Sp25                                                                     | 5 | 5 |
| 467 | Gala1-3(Fuca1-2)Galb1-3GalNAca-Sp8                                                                                                                                      | 5 | 9 |
| 179 | GlcNAcb1-3GalNAca-Sp8                                                                                                                                                   | 5 | 7 |
| 407 | Galb1-3GlcNAca1-6Galb1-4GlcNAcb-Sp0                                                                                                                                     | 5 | 6 |
| 448 | Galb1-4GlcNAcb1-2Mana-Sp0                                                                                                                                               | 5 | 4 |
| 217 | Manb1-4GlcNAcb-Sp0                                                                                                                                                      | 5 | 4 |
| 403 | Gala1-4Galb1-3GlcNAcb1-2Mana1-6(Gala1-4Galb1-3GlcNAcb1-2Mana1-3)Manb1-4GlcNAcb1-4GlcNAcb-Sp19                                                                           | 5 | 4 |
| 59  | Fuca1-2Galb1-3GalNAcb1-3Gala1-4Galb1-4Glc-Sp9                                                                                                                           | 5 | 0 |
| 461 | Neu5Aca2-3Galb1-4GlcNAcb1-6(Neu5Aca2-3Galb1-4GlcNAcb1-2)Mana1-6(GlcNAcb1-4)(Neu5Aca2-3Galb1-4GlcNAcb1-2Mana1-3)Manb1-4GlcNAcb1-4GlcNAcb-Sp21                            | 5 | 4 |
| 254 | Neu5Aca2-3Galb1-4(Fuca1-3)GlcNAcb-Sp0                                                                                                                                   | 5 | 4 |
| 419 | Galb1-4(Fuca1-3)GlcNAcb1-2Mana1-6(Galb1-4(Fuca1-3)GlcNAcb1-2Mana1-3)Manb1-4GlcNAcb1-4(Fuca1-6)GlcNAcb-Sp22                                                              | 5 | 2 |
| 406 | Galb1-3GlcNAcb1-6Galb1-4GlcNAcb-Sp0                                                                                                                                     | 5 | 3 |
| 49  | Neu5,9Ac2a2-6Galb1-4GlcNAcb-Sp8                                                                                                                                         | 5 | 4 |
| 318 | Neu5Aca2-6Galb1-4GlcNAcb1-2Mana1-6(Neu5Aca2-3Galb1-4GlcNAcb1-2Mana1-3)Manb1-4GlcNAcb1-4GlcNAcb-Sp12                                                                     | 5 | 3 |
| 155 | Galb1-4(6S)Glc-Sp0                                                                                                                                                      | 5 | 9 |
| 500 | Fuca1-2Galb1-3(6S)GlcNAcb-Sp0                                                                                                                                           | 5 | 5 |
| 530 | GlcNAcb1-2 Mana1-6(GlcNAcb1-4)(GlcNAcb1-2Mana1-3)Manb1-4GlcNAcb1-4(Fuca1-6)GlcNAcb-Sp21                                                                                 | 5 | 2 |
| 417 | Gala1-3(Fuca1-2)Galb1-4(Fuca1-3)GlcNAcb1-3GalNAcb-Sp14                                                                                                                  | 5 | 2 |
| 112 | Gala1-3GalNAcb-Sp8                                                                                                                                                      | 5 | 2 |
| 485 | Galb1-4GlcNAcb1-6(Galb1-4GlcNAcb1-2)Mana1-6(Galb1-4GlcNAcb1-2Mana1-3)Manb1-4GlcNAcb1-4(Fuca1-6)GlcNAcb-Sp24                                                             | 5 | 1 |
| 185 | GlcNAcb1-3Galb1-4Glc-Sp0                                                                                                                                                | 5 | 2 |
| 449 | Fuca1-2Galb1-4GlcNAcb1-6(Fuca1-2Galb1-4GlcNAcb1-3)GalNAcb-Sp14                                                                                                          | 5 | 3 |
| 194 | GlcNAcb1-6Galb1-4GlcNAcb-Sp8                                                                                                                                            | 5 | 1 |
| 278 | Neu5Ac2-6GalNAca-Sp8                                                                                                                                                    | 5 | 4 |
| 299 | Neu5Aca2-3Galb1-4(Fuca1-3)GlcNAcb1-6(Galb1-3)GalNAca-Sp14                                                                                                               | 5 | 1 |
| 533 | Fuca1-4(Galb1-3)GlcNAcb1-2 Mana-Sp0                                                                                                                                     | 5 | 2 |
| 375 | Fuca1-4(Fuca1-2Galb1-3)GlcNAcb1-2Mana1-3(Fuca1-4(Fuca1-2Galb1-3)GlcNAcb1-2Mana1-3)Manb1-4GlcNAcb1-4GlcNAcb-Sp19                                                         | 5 | 6 |

|     |                                                                                                                                                                                       |   |    |
|-----|---------------------------------------------------------------------------------------------------------------------------------------------------------------------------------------|---|----|
| 106 | Gala1-3(Fuca1-2)Galb1-4GlcB-Sp0                                                                                                                                                       | 5 | 4  |
| 79  | Fuca1-3GlcNAcb-Sp8                                                                                                                                                                    | 4 | 4  |
|     | Galb1-4GlcNAcb1-3Galb1-4GlcNAcb1-3Galb1-4GlcNAcb1-3Galb1-4GlcNAcb1-2Mana1-6(Galb1-4GlcNAcb1-3Galb1-4GlcNAcb1-3Galb1-4GlcNAcb1-3Galb1-4GlcNAcb1-2Mana1-3)Manb1-4GlcNAcb1-4GlcNAcb-Sp25 | 4 | 3  |
| 550 | GlcNAcb1-4GlcNAcb-Sp12                                                                                                                                                                | 4 | 2  |
| 311 | Galb1-3GlcNAcb1-3Galb1-4GlcNAcb1-6(Galb1-3GlcNAcb1-3)Galb1-4GlcB-Sp0                                                                                                                  | 4 | 3  |
| 382 | Neu5Aca2-6(Galb1-3)GalNAca-Sp8                                                                                                                                                        | 4 | 4  |
| 135 | GlcNAca1-6Galb1-4GlcNAcb-Sp8                                                                                                                                                          | 4 | 4  |
| 174 | Galb1-4GlcNAcb1-3Galb1-4GlcNAcb1-2Mana1-6(Galb1-4GlcNAcb1-3Galb1-4GlcNAcb1-2Mana1-3)Manb1-4GlcNAcb1-4(Fuca1-6)GlcNAcb-Sp24                                                            | 4 | 5  |
| 575 | Galb1-4(Fuca1-3)GlcNAcb1-3GalNAca-Sp14                                                                                                                                                | 4 | 6  |
| 401 | Gala1-3(Fuca1-2)Galb1-4GlcNAcb1-2Mana1-6(Gala1-3(Fuca1-2)Galb1-4GlcNAcb1-2Mana1-3)Manb1-4GlcNAcb1-4GlcNAcb-Sp20                                                                       | 4 | 7  |
| 371 | GlcNAcb1-3Galb1-4GlcNAcb1-2Mana1-6(GlcNAcb1-3Galb1-4GlcNAcb1-2Mana1-3)Manb1-4GlcNAcb1-4GlcNAcb-Sp12                                                                                   | 4 | 10 |
| 539 | Galb1-4GlcNAcb1-3Galb1-4GlcNAcb-Sp0                                                                                                                                                   | 4 | 5  |
| 163 | Neu5Aca2-3Galb1-4GlcNAcb1-3Galb1-3GlcNAcb-Sp0                                                                                                                                         | 4 | 3  |
| 295 | GlcNAcb1-2Mana1-6(Neu5Aca2-6Galb1-4GlcNAcb1-2Mana1-3)Manb1-4GlcNAcb1-4GlcNAcb-Sp12                                                                                                    | 4 | 2  |
| 320 | Fuca1-2(6S)Galb1-3(6S)GlcNAcb-Sp0                                                                                                                                                     | 4 | 2  |
| 501 | (6S)Galb1-4GlcNAcb-Sp8                                                                                                                                                                | 4 | 5  |
| 44  | Fuca1-4(Galb1-3)GlcNAcb-Sp8                                                                                                                                                           | 4 | 5  |
| 130 | Neu5Aca2-6Galb1-4GlcNAcb1-2Mana1-6Manb1-4GlcNAcb1-4GlcNAcb-Sp12                                                                                                                       | 4 | 3  |
| 347 | Neu5Aca2-3Galb1-4GlcNAcb-Sp8                                                                                                                                                          | 4 | 1  |
| 260 | Gala1-3Galb1-4(Fuca1-3)GlcNAcb-Sp8                                                                                                                                                    | 4 | 10 |
| 113 | Galb1-4GlcNAcb1-3Galb1-4GlcB-Sp0                                                                                                                                                      | 4 | 0  |
| 164 | GlcAb-Sp8                                                                                                                                                                             | 4 | 5  |
| 202 | Mana1-6(Mana1-3)Manb1-4GlcNAcb1-4(Fuca1-6)GlcNAcb-Sp19                                                                                                                                | 4 | 3  |
| 484 | Neu5Gca2-6Galb1-4GlcNAcb-Sp0                                                                                                                                                          | 4 | 2  |
| 286 | Galb1-4GlcNAcb1-2Mana1-6(Mana1-3)Manb1-4GlcNAcb1-4GlcNAcb-Sp12                                                                                                                        | 4 | 5  |
| 364 | Galb1-3Galb-Sp8                                                                                                                                                                       | 4 | 4  |
| 146 | Fuca1-2Galb1-4GlcNAcb1-3Galb1-4GlcNAcb1-3Galb1-4GlcNAcb-Sp0                                                                                                                           | 4 | 6  |
| 74  | GlcNAcb1-3Galb1-3GalNAc-Sp14                                                                                                                                                          | 4 | 4  |
| 566 | Neu5Aca2-3Galb1-4(Fuca1-3)GlcNAcb-Sp8                                                                                                                                                 | 4 | 2  |
| 255 | Neu5Aca2-6Galb1-4GlcNAcb1-3Galb1-4(Fuca1-3)GlcNAcb1-3Galb1-4(Fuca1-3)GlcNAcb-Sp0                                                                                                      | 4 | 8  |
| 270 | GlcNAcb1-3Galb1-4GlcNAcb1-6(GlcNAcb1-3Galb1-3)GalNAca-Sp14                                                                                                                            | 4 | 7  |
| 561 | GlcNAcb1-4GlcNAcb-Sp10                                                                                                                                                                | 4 | 5  |
| 310 | Fuca1-2Galb1-3GalNAcb1-3Gala-Sp9                                                                                                                                                      | 4 | 2  |
| 58  | GlcNAcb1-3Galb1-4GlcNAcb1-3Galb1-4GlcNAcb1-2Mana1-6(GlcNAcb1-3Galb1-4GlcNAcb1-3Galb1-4GlcNAcb1-2Mana1-3)Manb1-4GlcNAcb1-4GlcNAcb-Sp12                                                 | 4 | 4  |
| 545 | (3S)GalNAcb1-4(Fuca1-3)GlcNAcb-Sp8                                                                                                                                                    | 4 | 2  |
| 504 | Neu5Aca2-6Galb1-4GlcNAcb1-2Mana1-6(Galb1-4GlcNAcb1-2Mana1-3)Manb1-4GlcNAcb1-4GlcNAcb-Sp12                                                                                             | 4 | 5  |
| 301 | GlcNAcb1-2(GlcNAcb1-6)Mana1-6(GlcNAcb1-2Mana1-3)Manb1-4GlcNAcb1-4GlcNAcb-Sp19                                                                                                         | 4 | 5  |
| 421 | Neu5Aca2-6Galb1-4GlcNAcb1-6(Neu5Aca2-6Galb1-4GlcNAcb1-2)Mana1-6(GlcNAcb1-4)(Neu5Aca2-6Galb1-4GlcNAcb1-2Mana1-3)Manb1-4GlcNAcb1-4GlcNAcb-Sp21                                          | 4 | 6  |
| 465 | Galb1-4(Fuca1-3)GlcNAcb1-3Galb1-4(Fuca1-3)GlcNAcb1-3Galb1-4(Fuca1-3)GlcNAcb-Sp0                                                                                                       | 4 | 2  |
| 154 | Neu5Aca2-3Galb1-4GlcNAcb1-4Mana1-6(GlcNAcb1-4)(Neu5Aca2-3Galb1-4GlcNAcb1-4)(Neu5Aca2-3Galb1-4GlcNAcb1-2)Mana1-3)Manb1-4GlcNAcb1-4GlcNAcb-Sp21                                         | 4 | 4  |
| 460 | GalNAca1-3(Fuca1-2)Galb1-4GlcNAcb1-6(GalNAca1-3(Fuca1-2)Galb1-4GlcNAcb1-3)GalNAc-Sp14                                                                                                 | 4 | 9  |
| 451 | Galb1-4GlcNAcb1-2Mana1-6(Neu5Aca2-6Galb1-4GlcNAcb1-2Mana1-3)Manb1-4GlcNAcb1-4GlcNAcb-Sp12                                                                                             | 4 | 2  |
| 319 | Neu5Aca2-6(Galb1-3)GalNAca-Sp14                                                                                                                                                       | 4 | 3  |
| 136 | GlcNAca1-4Galb1-3GalNAc-Sp14                                                                                                                                                          | 4 | 5  |
| 344 | Galb1-4GlcNAcb1-3Galb1-4GlcNAcb1-3Galb1-4GlcNAcb1-2Mana1-6(Galb1-4GlcNAcb1-3Galb1-4GlcNAcb1-3Galb1-4GlcNAcb1-2Mana1-3)Manb1-4GlcNAcb1-4GlcNAcb-Sp12                                   | 4 | 5  |
| 547 | GlcN(Gc)b-Sp8                                                                                                                                                                         | 4 | 6  |
| 18  | GlcNAcb1-2Mana1-6(GlcNAcb1-2Mana1-3)Manb1-4GlcNAcb1-4(Fuca1-6)GlcNAcb-Sp22                                                                                                            | 4 | 3  |
| 352 | KDNa2-3Galb1-3GlcNAcb-Sp0                                                                                                                                                             | 4 | 3  |
| 205 | Galb1-4(Fuca1-3)GlcNAcb1-3Galb1-3(Fuca1-4)GlcNAcb-Sp0                                                                                                                                 | 3 | 4  |
| 292 |                                                                                                                                                                                       |   |    |



|     |                                                                                                                                                                           |   |   |
|-----|---------------------------------------------------------------------------------------------------------------------------------------------------------------------------|---|---|
| 543 | Neu5Gca2-3Galb1-4GlcNAcb1-3Galb1-4GlcNAcb1-2Mana1-6(Neu5Gca2-3Galb1-4GlcNAcb1-3Galb1-4GlcNAcb1-2Mana1-3)Manb1-4GlcNAcb1-4GlcNAcb-Sp24                                     | 3 | 3 |
| 469 | Glca1-6Glca1-6Glca1-6GlcB-Sp10                                                                                                                                            | 3 | 8 |
| 236 | Neu5Aca2-3GalNAca-Sp8                                                                                                                                                     | 3 | 4 |
| 206 | KDNa2-3Galb1-4GlcNAcb-Sp0                                                                                                                                                 | 3 | 3 |
| 256 | Neu5Aca2-3Galb1-4(Fuca1-3)GlcNAcb1-3Galb-Sp8                                                                                                                              | 3 | 5 |
| 377 | Neu5Aca2-6Galb1-4GlcNAcb1-3GalNAc-Sp14                                                                                                                                    | 3 | 1 |
| 537 | Gala1-3(Fuca1-2)Galb1-3GalNAcb1-3Gala1-4Galb1-4Glc-Sp21                                                                                                                   | 3 | 6 |
| 502 | Neu5Aca2-6GalNAcb1-4(6S)GlcNAcb-Sp8                                                                                                                                       | 3 | 3 |
| 458 | Galb1-4GlcNAcb1-6(Galb1-4GlcNAcb1-2)Mana1-6(Galb1-4GlcNAcb1-2Mana1-3)Manb1-4GlcNAcb1-4GlcNAcb-Sp19                                                                        | 3 | 5 |
| 201 | GlcAa-Sp8                                                                                                                                                                 | 3 | 6 |
| 508 | Galb1-4GlcNAcb1-6(Galb1-4GlcNAcb1-2)Mana1-6(GlcNAcb1-4)Galb1-4GlcNAcb1-4(Galb1-4GlcNAcb1-2)Mana1-3)Manb1-4GlcNAcb1-4(Fuca1-6)GlcNAc-Sp21                                  | 2 | 6 |
| 246 | Neu5Aca2-3Galb1-3GalNAcb1-3Gala1-4Galb1-4GlcB-Sp0                                                                                                                         | 2 | 8 |
| 104 | Gala1-3(Fuca1-2)Galb1-4(Fuca1-3)GlcNAcb-Sp8                                                                                                                               | 2 | 7 |
| 117 | Gala1-3Galb1-4Glc-Sp10                                                                                                                                                    | 2 | 5 |
| 387 | Galb1-4GlcNAcb1-6(Galb1-4GlcNAcb1-2)Mana1-6(Galb1-4GlcNAcb1-4(Galb1-4GlcNAcb1-2)Mana1-3)Manb1-4GlcNAcb1-4GlcNAcb-Sp21                                                     | 2 | 4 |
| 569 | (3S)GlcAb1-3Galb1-4GlcNAcb1-3Galb1-4Glc-Sp0                                                                                                                               | 2 | 4 |
| 291 | Galb1-4(Fuca1-3)(6S)GlcB-Sp0                                                                                                                                              | 2 | 4 |
| 150 | Galb1-3GlcNAcb-Sp8                                                                                                                                                        | 2 | 5 |
| 133 | GlcNAcb1-6(Galb1-3)GalNAca-Sp8                                                                                                                                            | 2 | 4 |
| 608 | Neu5Aca2-6Galb1-4GlcNAcb1-3Galb1-4GlcNAcb1-2Mana1-6(Neu5Aca2-6Galb1-4GlcNAcb1-3Galb1-4GlcNAcb1-2Mana1-3)Manb1-4GlcNAcb1-4GlcNAcb-Sp12                                     | 2 | 5 |
| 570 | (3S)GlcAb1-3Galb1-4GlcNAcb1-2Mana-Sp0                                                                                                                                     | 2 | 1 |
| 122 | Gala1-4Galb1-4GlcB-Sp0                                                                                                                                                    | 2 | 5 |
| 602 | Neu5Aca2-6Galb1-4GlcNAcb1-6(Galb1-3)GalNAca-Sp14                                                                                                                          | 2 | 8 |
| 3   | Mana-Sp8                                                                                                                                                                  | 2 | 3 |
| 165 | Galb1-4GlcNAcb1-3Galb1-4GlcB-Sp8                                                                                                                                          | 2 | 6 |
| 327 | Galb1-4(Fuca1-3)GlcNAcb1-2Mana1-6(Galb1-4(Fuca1-3)GlcNAcb1-2Mana1-3)Manb1-4GlcNAcb1-4GlcNAcb-Sp20                                                                         | 2 | 4 |
| 426 | Fuca1-2Galb1-3GlcNAcb1-2Mana1-6(Fuca1-2Galb1-3GlcNAcb1-2Mana1-3)Manb1-4GlcNAcb1-4(Fuca1-6)GlcNAcb-Sp22                                                                    | 2 | 4 |
| 257 | Neu5Aca2-3Galb1-4(Fuca1-3)GlcNAcb1-3Galb1-4GlcNAcb-Sp8                                                                                                                    | 2 | 1 |
| 148 | Galb1-3GlcNAcb1-3Galb1-4GlcB-Sp10                                                                                                                                         | 2 | 3 |
| 535 | GlcNAcb1-3Galb1-4GlcNAcb1-6(GlcNAcb1-3)Galb1-4GlcNAc-Sp0                                                                                                                  | 2 | 8 |
| 486 | Neu5Aca2-3Galb1-3GlcNAcb1-2Mana1-6(GlcNAcb1-4)(Neu5Aca2-3Galb1-3GlcNAcb1-2Mana1-3)Manb1-4GlcNAcb1-4GlcNAc-Sp21                                                            | 2 | 1 |
| 186 | GlcNAcb1-4-MDPLys                                                                                                                                                         | 2 | 6 |
| 26  | (3S)Galb1-4(6S)GlcB-Sp0                                                                                                                                                   | 2 | 2 |
| 542 | Galb1-4GlcNAcb1-3Galb1-4GlcNAcb1-2Mana1-6(Galb1-4GlcNAcb1-3Galb1-4GlcNAcb1-2Mana1-3)Manb1-4GlcNAcb1-4GlcNAcb-Sp24                                                         | 2 | 6 |
| 124 | Gala1-6GlcB-Sp8                                                                                                                                                           | 2 | 6 |
| 434 | GlcNAcb1-6(GlcNAcb1-2)Mana1-6(GlcNAcb1-4)(GlcNAcb1-4(GlcNAcb1-2)Mana1-3)Manb1-4GlcNAcb1-4GlcNAc-Sp21                                                                      | 2 | 3 |
| 482 | Neu5Aca2-6Galb1-4GlcNAcb1-2Mana1-6(Neu5Aca2-6Galb1-4GlcNAcb1-2Mana1-3)Manb1-4GlcNAcb1-4(Fuca1-6)GlcNAcb-Sp24                                                              | 2 | 6 |
| 452 | Neu5Aca2-8Neu5Aca2-3Galb1-3GalNAcb1-4(Neu5Aca2-8Neu5Aca2-3)Galb1-4GlcB-Sp0                                                                                                | 2 | 1 |
| 220 | Fuca1-2(6S)Galb1-4GlcNAcb-Sp0                                                                                                                                             | 2 | 2 |
| 496 | Galb1-4(Fuca1-3)GlcNAcb1-2Mana-Sp0                                                                                                                                        | 2 | 5 |
| 280 | Neu5Gca2-3Galb1-3(Fuca1-4)GlcNAcb-Sp0                                                                                                                                     | 2 | 5 |
| 433 | GlcNAcb1-6(GlcNAcb1-2)Mana1-6(GlcNAcb1-4)(GlcNAcb1-2Mana1-3)Manb1-4GlcNAcb1-4GlcNAc-Sp21                                                                                  | 2 | 0 |
| 337 | Neu5Aca2-3Galb1-4(Fuca1-3)GlcNAcb1-6(Neu5Aca2-3Galb1-3)GalNAc-Sp14                                                                                                        | 2 | 9 |
| 333 | Gala1-4Galb1-4GlcNAcb1-3Galb1-4GlcB-Sp0                                                                                                                                   | 2 | 3 |
| 462 | Neu5Aca2-3Galb1-4GlcNAcb1-6(Neu5Aca2-3Galb1-4GlcNAcb1-2)Mana1-6(GlcNAcb1-4)(Neu5Aca2-3Galb1-4GlcNAcb1-4(Neu5Aca2-3Galb1-4GlcNAcb1-2)Mana1-3)Manb1-4GlcNAcb1-4GlcNAcb-Sp21 | 2 | 1 |
| 219 | (3S)Galb1-4(Fuca1-3)(6S)GlcNAcb-Sp8                                                                                                                                       | 2 | 5 |
| 410 | Galb1-4GlcNAcb1-6(Neu5Aca2-6Galb1-3GlcNAcb1-3)Galb1-4Glc-Sp21                                                                                                             | 2 | 6 |
| 556 | Neu5Gca2-8Neu5Gca2-6Galb1-4GlcNAc-Sp0                                                                                                                                     | 2 | 5 |
| 385 | Galb1-4(Fuca1-3)GlcNAcb1-6(Fuca1-4(Fuca1-2Galb1-3)GlcNAcb1-3)Galb1-4Glc-Sp21                                                                                              | 2 | 6 |



|     |                                                                                                                                             |   |   |
|-----|---------------------------------------------------------------------------------------------------------------------------------------------|---|---|
| 183 | GlcNAcb1-3Galb1-4GlcNAcb-Sp8                                                                                                                | 2 | 4 |
| 314 | Mana1-6(Mana1-3)Mana1-6(Mana1-3)Manb-Sp10                                                                                                   | 2 | 4 |
| 326 | Neu5Aca2-3Galb1-4GlcNAcb1-2Mana1-6(Neu5Aca2-6Galb1-4GlcNAcb1-2Mana1-3)Manb1-4GlcNAcb1-4GlcNAcb-Sp12                                         | 2 | 3 |
| 481 | Neu5Aca2-6Galb1-4 GlcNAcb1-6(Neu5Aca2-6Galb1-4GlcNAcb1-3)GalNAca-Sp14                                                                       | 2 | 4 |
| 456 | Neu5Aca2-6Galb1-4GlcNAcb1-6(Fuca1-2Galb1-3GlcNAcb1-3)Galb1-4Glc-Sp21                                                                        | 1 | 5 |
| 159 | Galb1-4GlcNAcb1-3GalNAca-Sp8                                                                                                                | 1 | 8 |
| 127 | Galb1-3GlcNAcb1-3Galb1-4(Fuca1-3)GlcNAcb-Sp0                                                                                                | 1 | 4 |
| 134 | GlcNAcb1-6(Galb1-3)GalNAca-Sp14                                                                                                             | 1 | 4 |
| 389 | Fuca1-2Galb1-3GalNAca1-3(Fuca1-2)Galb1-4Glc-Sp0                                                                                             | 1 | 4 |
| 363 | Gala1-3Galb1-4GlcNAcb1-2Mana1-6(Gala1-3Galb1-4GlcNAcb1-2Mana1-3)Manb1-4GlcNAcb1-4GlcNAcb-Sp20                                               | 1 | 2 |
| 177 | GlcNAcb1-6(GlcNAcb1-3)GalNAca-Sp14                                                                                                          | 1 | 3 |
| 468 | Gala1-3(Fuca1-2)Galb1-3GalNAcb-Sp8                                                                                                          | 1 | 2 |
| 567 | Galb1-3GlcNAcb1-6(Galb1-3)GalNAc-Sp14                                                                                                       | 1 | 7 |
| 473 | Fuca1-2Galb1-3(Fuca1-4)GlcNAcb1-2Mana1-6(Fuca1-2Galb1-3(Fuca1-4)GlcNAcb1-2Mana1-3)Manb1-4GlcNAcb1-4(Fuca1-6)GlcNAcb1-4(Fuca1-6)GlcNAcb-Sp19 | 1 | 7 |
| 534 | Neu5Aca2-3Galb1-4(Fuca1-3)GlcNAcb1-2Mana-Sp0                                                                                                | 1 | 5 |
| 243 | Neu5Aca2-6(Neu5Aca2-3Galb1-3)GalNAca-Sp8                                                                                                    | 1 | 5 |
| 339 | GlcNAca1-4Galb1-4GlcNAcb-Sp0                                                                                                                | 1 | 5 |
| 37  | (3S)Galb1-4GlcNAcb-Sp8                                                                                                                      | 1 | 5 |
| 513 | (3S)GalNAcb1-4(3S)GlcNAc-Sp8                                                                                                                | 1 | 2 |
| 425 | Gala1-3Galb1-3GlcNAcb1-3GalNAc-Sp14                                                                                                         | 1 | 5 |
| 317 | Neu5Aca2-3Galb1-4GlcNAcb1-6(Neu5Aca2-3Galb1-3)GalNAca-Sp14                                                                                  | 1 | 4 |
| 175 | GlcNAcb1-2Galb1-3GalNAca-Sp8                                                                                                                | 1 | 6 |
| 350 | Galb1-4GlcNAcb1-2Mana1-6Manb1-4GlcNAcb1-4GlcNAc-Sp12                                                                                        | 1 | 2 |
| 242 | Neu5Aca2-3Galb1-3(6S)GalNAca-Sp8                                                                                                            | 1 | 5 |
| 357 | KDNa2-6Galb1-4GlcNAc-Sp0                                                                                                                    | 1 | 8 |
| 353 | Galb1-4GlcNAcb1-2Mana1-6(Galb1-4GlcNAcb1-2Mana1-3)Manb1-4GlcNAcb1-4(Fuca1-6)GlcNAcb-Sp22                                                    | 1 | 6 |
| 53  | GlcNAcb1-2Mana1-6(GlcNAcb1-2Mana1-3)Manb1-4GlcNAcb1-4GlcNAcb-Sp13                                                                           | 1 | 5 |
| 250 | Neu5Aca2-3Galb1-3GlcNAcb-Sp8                                                                                                                | 1 | 5 |
| 499 | Fuca1-2Galb1-4GlcNAcb1-2Mana-Sp0                                                                                                            | 1 | 4 |
| 293 | Galb1-4GlcNAcb1-3Galb1-3GlcNAcb-Sp0                                                                                                         | 1 | 5 |
| 281 | Neu5Gca2-3Galb1-3GlcNAcb-Sp0                                                                                                                | 1 | 3 |
| 115 | Gala1-3Galb1-4GlcNAcb-Sp8                                                                                                                   | 1 | 5 |
| 544 | Fuca1-2Galb1-4GlcNAcb1-3Galb1-4GlcNAcb1-2Mana1-6(Fuca1-2Galb1-4GlcNAcb1-3Galb1-4GlcNAcb1-2Mana1-3)Manb1-4GlcNAcb1-4GlcNAcb-Sp24             | 1 | 2 |
| 551 | Galb1-3GlcNAcb1-3Galb1-4GlcNAcb1-2Mana1-6(Galb1-3GlcNAcb1-3Galb1-4GlcNAcb1-2Mana1-3)Manb1-4GlcNAcb1-4GlcNAc-Sp25                            | 1 | 1 |
| 354 | Galb1-3GlcNAcb1-2Mana1-6(Galb1-3GlcNAcb1-2Mana1-3)Manb1-4GlcNAcb1-4(Fuca1-6)GlcNAcb-Sp22                                                    | 1 | 3 |
| 239 | Neu5Aca2-3Galb1-3(Fuca1-4)GlcNAcb-Sp8                                                                                                       | 1 | 3 |
| 409 | Gala1-3(Fuca1-2)Galb1-4(Fuca1-3)Glc-Sp21                                                                                                    | 1 | 1 |
| 46  | Neu5Aca2-3(6S)Galb1-4GlcNAcb-Sp8                                                                                                            | 1 | 4 |
| 203 | GlcAb1-3Galb-Sp8                                                                                                                            | 1 | 4 |
| 126 | Galb1-3(Fuca1-4)GlcNAcb1-3Galb1-4(Fuca1-3)GlcNAcb-Sp0                                                                                       | 1 | 7 |
| 330 | Neu5Aca2-6Galb1-4GlcNAcb1-3Galb1-3GlcNAcb-Sp0                                                                                               | 1 | 6 |
| 199 | Glc1-6Glc-Sp8                                                                                                                               | 1 | 4 |
| 430 | Fuca1-3GlcNAcb1-6(Galb1-4GlcNAcb1-3)Galb1-4Glc-Sp21                                                                                         | 1 | 6 |
| 6   | Fuca-Sp8                                                                                                                                    | 1 | 9 |
| 302 | Galb1-4GlcNAcb1-6(Galb1-4GlcNAcb1-3)Galb1-4GlcNAc-Sp0                                                                                       | 1 | 2 |
| 523 | GalNAca1-3(Fuca1-2)Galb1-4 GlcNAcb1-2Mana-Sp0                                                                                               | 1 | 3 |
| 300 | Galb1-3Galb1-4GlcNAcb-Sp8                                                                                                                   | 1 | 6 |
| 151 | Galb1-4(Fuca1-3)GlcNAcb-Sp0                                                                                                                 | 1 | 3 |
| 61  | Fuca1-2Galb1-3GalNAca-Sp8                                                                                                                   | 1 | 3 |

|     |                                                                                                                          |    |   |
|-----|--------------------------------------------------------------------------------------------------------------------------|----|---|
| 431 | GlcNAcb1-2Mana1-6(GlcNAcb1-4)(GlcNAcb1-2Mana1-3)Manb1-4GlcNAcb1-4GlcNAc-Sp21                                             | 1  | 5 |
| 358 | KDNa2-3Galb1-4Glc-Sp0                                                                                                    | 1  | 3 |
| 594 | GlcNAcb1-3Galb1-4GlcNAcb1-6(Galb1-3)GalNAca-Sp14                                                                         | 1  | 4 |
| 427 | Gala1-3(Fuca1-2)Galb1-4GlcNAcb1-2Mana1-6(Gala1-3(Fuca1-2)Galb1-4GlcNAcb1-2Mana1-3)Manb1-4GlcNAcb1-4(Fuca1-6)GlcNAcb-Sp22 | 1  | 2 |
| 367 | Neu5Aca2-6GlcNAcb1-4GlcNAcb1-4GlcNAc-Sp21                                                                                | 1  | 1 |
| 54  | Galb1-4GlcNAcb1-2Mana1-6(Galb1-4GlcNAcb1-2Mana1-3)Manb1-4GlcNAcb1-4GlcNAcb-Sp12                                          | 0  | 7 |
| 211 | Mana1-2Mana1-6(Mana1-3)Mana1-6(Mana1-2Mana1-2Mana1-3)Manb1-4GlcNAcb1-4GlcNAcb-Sp12                                       | 0  | 3 |
| 349 | Galb1-4GlcNAcb1-2Mana1-3Manb1-4GlcNAcb1-4GlcNAc-Sp12                                                                     | 0  | 2 |
| 169 | Galb1-4GlcNAcb-Sp8                                                                                                       | 0  | 1 |
| 156 | Galb1-4(6S)Glc-Sp8                                                                                                       | 0  | 4 |
| 262 | Fuca1-2Galb1-4(6S)Glc-Sp0                                                                                                | 0  | 5 |
| 10  | Neu5Aca-Sp11                                                                                                             | 0  | 2 |
| 100 | Gala1-2Galb-Sp8                                                                                                          | 0  | 4 |
| 414 | GalNAca1-3(Fuca1-2)Galb1-4GlcNAcb1-3GalNAca-Sp14                                                                         | 0  | 7 |
| 47  | (6S)GlcNAcb-Sp8                                                                                                          | 0  | 1 |
| 560 | Gala1-3Galb1-4GlcNAcb1-2Mana1-6(Gala1-3Galb1-4GlcNAcb1-2Mana1-3)Manb1-4GlcNAcb1-4GlcNAc-Sp24                             | 0  | 3 |
| 83  | GalNAca1-3(Fuca1-2)Galb1-4(Fuca1-3)GlcNAcb-Sp0                                                                           | 0  | 2 |
| 38  | (3S)Galb-Sp8                                                                                                             | 0  | 0 |
| 304 | Galb1-4GlcNAca1-6Galb1-4GlcNAcb-Sp0                                                                                      | 0  | 5 |
| 145 | Galb1-3GalNAcb1-4Galb1-4Glc-Sp8                                                                                          | 0  | 2 |
| 70  | Fuca1-2Galb1-4(Fuca1-3)GlcNAcb1-3Galb1-4(Fuca1-3)GlcNAcb-Sp0                                                             | 0  | 4 |
| 455 | Gala1-3(Fuca1-2)Galb1-3GlcNAcb1-2Mana1-6(Gala1-3(Fuca1-2)Galb1-3GlcNAcb1-2Mana1-3)Manb1-4GlcNAcb1-4(Fuca1-6)GlcNAcb-Sp22 | 0  | 2 |
| 497 | Fuca1-2(6S)Galb1-3GlcNAcb-Sp0                                                                                            | 0  | 4 |
| 553 | Neu5Aca2-8Neu5Gca2-3Galb1-4GlcNAc-Sp0                                                                                    | 0  | 6 |
| 272 | Neu5Aca2-6Galb1-4Glc-Sp0                                                                                                 | 0  | 2 |
| 289 | Galb1-3GlcNAcb1-3Galb1-3GlcNAcb-Sp0                                                                                      | 0  | 7 |
| 331 | Neu5Aca2-3Galb1-3(Fuca1-4)GlcNAcb1-3Galb1-3(Fuca1-4)GlcNAcb-Sp0                                                          | 0  | 4 |
| 77  | Fuca1-2Galb1-4Glc-Sp0                                                                                                    | 0  | 7 |
| 429 | Galb1-4GlcNAcb1-6(Fuca1-2Galb1-3GlcNAcb1-3)Galb1-4Glc-Sp21                                                               | 0  | 2 |
| 111 | Gala1-3GalNAca-Sp16                                                                                                      | 0  | 6 |
| 158 | Galb1-4GalNAcb1-3(Fuca1-2)Galb1-4GlcNAcb-Sp8                                                                             | 0  | 2 |
| 216 | Mana1-6(Mana1-3)Mana1-6(Mana1-3)Manb1-4GlcNAcb1-4GlcNAcb-Sp12                                                            | 0  | 5 |
| 176 | GlcNAcb1-6(GlcNAcb1-3)GalNAca-Sp8                                                                                        | 0  | 2 |
| 487 | Neu5Aca2-6Galb1-4GlcNAcb1-6(Fuca1-2Galb1-4(Fuca1-3)GlcNAcb1-3)Galb1-4Glc-Sp21                                            | 0  | 3 |
| 227 | Neu5Aca2-8Neu5Aca2-8Neu5Aca2-3Galb1-4Glc-Sp0                                                                             | 0  | 4 |
| 196 | Glca1-4Glca-Sp8                                                                                                          | 0  | 6 |
| 197 | Glca1-6Glca1-6Glc-Sp8                                                                                                    | 0  | 1 |
| 223 | Neu5Aca2-3Galb1-3GalNAca-Sp8                                                                                             | 0  | 5 |
| 245 | Neu5Aca2-3Galb-Sp8                                                                                                       | 0  | 3 |
| 73  | Fuca1-2Galb1-4GlcNAcb1-3Galb1-4GlcNAcb-Sp0                                                                               | 0  | 4 |
| 476 | Galb1-3GlcNAcb1-2Mana1-6(GlcNAcb1-4)(Galb1-3GlcNAcb1-2Mana1-3)Manb1-4GlcNAcb1-4GlcNAcb-Sp21                              | 0  | 2 |
| 600 | Neu5Aca2-3Galb1-4GlcNAcb1-3Galb1-4GlcNAcb1-6(Galb1-3)GalNAca-Sp14                                                        | 0  | 8 |
| 422 | Fuca1-2Galb1-3GlcNAcb1-3GalNAc-Sp14                                                                                      | 0  | 2 |
| 80  | Fuca1-4GlcNAcb-Sp8                                                                                                       | 0  | 3 |
| 128 | Galb1-3(Fuca1-4)GlcNAc-Sp0                                                                                               | 0  | 2 |
| 341 | GlcNAca1-4Galb1-4GlcNAcb1-3Galb1-4Glc-Sp0                                                                                | 0  | 4 |
| 283 | Neu5Gca2-3Galb1-4GlcNAcb-Sp0                                                                                             | 0  | 3 |
| 522 | Gala1-3(Fuca1-2)Galb1-4GlcNAcb1-2Mana-Sp0                                                                                | -1 | 3 |
| 386 | Galb1-3GlcNAcb1-3Galb1-4(Fuca1-3)GlcNAcb1-6(Galb1-3GlcNAcb1-3)Galb1-4Glc-Sp21                                            | -1 | 6 |

|     |                                                                                                                                    |    |   |
|-----|------------------------------------------------------------------------------------------------------------------------------------|----|---|
| 210 | Mana1-6(Mana1-2Mana1-3)Mana1-6(Mana1-2Mana1-3)Manb1-4GlcNAcb1-4GlcNAcb-Sp12                                                        | -1 | 2 |
| 307 | GlcAb1-3GlcNAcb-Sp8                                                                                                                | -1 | 4 |
| 510 | Galb1-3(6S)GlcNAcb-Sp8                                                                                                             | -1 | 3 |
| 396 | Neu5Aca2-3Galb1-3GlcNAcb1-2Mana1-6(Neu5Aca2-3Galb1-3GlcNAcb1-2Mana1-3)Manb1-4GlcNAcb1-4GlcNAcb-Sp19                                | -1 | 6 |
| 345 | Neu5Aca2-6Galb1-4GlcNAcb1-2Mana1-6(Mana1-3)Manb1-4GlcNAcb1-4GlcNAcb-Sp12                                                           | -1 | 8 |
| 574 | GlcNAcb1-3Galb1-4GlcNAcb1-2Mana1-6(GlcNAcb1-3Galb1-4GlcNAcb1-2Mana1-3)Manb1-4GlcNAcb1-4(Fuca1-6)GlcNAcb-Sp24                       | -1 | 3 |
| 161 | Galb1-4GlcNAcb1-3Galb1-4(Fuca1-3)GlcNAcb1-3Galb1-4(Fuca1-3)GlcNAcb-Sp0                                                             | -1 | 5 |
| 518 | (6P)Galb1-4GlcNAcb-Sp0                                                                                                             | -1 | 5 |
| 67  | Fuca1-2Galb1-3GlcNAcb-Sp0                                                                                                          | -1 | 3 |
| 214 | Mana1-2Mana1-2Mana1-6(Mana1-3)Mana-Sp9                                                                                             | -1 | 3 |
| 315 | Mana1-2Mana1-6(Mana1-3)Mana1-6(Mana1-2Mana1-2Mana1-3)Mana-Sp9                                                                      | -1 | 3 |
| 195 | Glca1-4Glc-Sp8                                                                                                                     | -1 | 4 |
| 149 | Galb1-3GlcNAcb-Sp0                                                                                                                 | -1 | 5 |
| 252 | Neu5Aca2-3Galb1-4(Fuca1-3)(6S)GlcNAcb-Sp8                                                                                          | -1 | 8 |
| 235 | Neu5Aca2-6(Neu5Aca2-3)GalNAca-Sp8                                                                                                  | -1 | 4 |
| 397 | GlcNAcb1-2Mana1-6(Galb1-4GlcNAcb1-2Mana1-3)Manb1-4GlcNAcb1-4GlcNAcb-Sp12                                                           | -1 | 2 |
| 383 | Galb1-4(Fuca1-3)GlcNAcb1-6(Galb1-3GlcNAcb1-3)Galb1-4Glc-Sp21                                                                       | -1 | 3 |
| 521 | Gala1-3Galb1-4GlcNAcb1-2Mana-Sp0                                                                                                   | -1 | 1 |
| 423 | Gala1-3(Fuca1-2)Galb1-3GlcNAcb1-3GalNAcb-Sp14                                                                                      | -1 | 7 |
| 477 | Neu5Aca2-6Galb1-4GlcNAcb1-6(Galb1-3GlcNAcb1-3)Galb1-4Glc-Sp21                                                                      | -1 | 3 |
| 356 | KDNa2-3Galb1-4(Fuca1-3)GlcNAcb-Sp0                                                                                                 | -1 | 5 |
| 42  | (6S)Galb1-4Glc-Sp0                                                                                                                 | -1 | 5 |
| 381 | Galb1-3GalNAca1-3(Fuca1-2)Galb1-4GlcNAcb-Sp0                                                                                       | -1 | 6 |
| 438 | Galb1-4GlcNAcb1-6(Galb1-4GlcNAcb1-2)Mana1-6(GlcNAcb1-4)(Galb1-4GlcNAcb1-4)(Galb1-4GlcNAcb1-2)Mana1-3)Manb1-4GlcNAcb1-4GlcNAcb-Sp21 | -1 | 4 |
| 598 | GlcNAcb1-3Galb1-4GlcNAcb1-3Galb1-4GlcNAcb1-3GalNAca-Sp14                                                                           | -1 | 3 |
| 601 | Neu5Aca2-6Galb1-4GlcNAcb1-3Galb1-4GlcNAcb1-6(Galb1-3)GalNAca-Sp14                                                                  | -2 | 3 |
| 229 | Neu5Aca2-8Neu5Aca2-8Neu5Aca-Sp8                                                                                                    | -2 | 4 |
| 412 | Neu5Aca2-3Galb1-3GalNAcb1-4(Neu5Aca2-8Neu5Aca2-3)Galb1-4Glc-Sp0                                                                    | -2 | 3 |
| 435 | Galb1-4GlcNAcb1-2Mana1-6(GlcNAcb1-4)(Galb1-4GlcNAcb1-2Mana1-3)Manb1-4GlcNAcb1-4GlcNAcb-Sp21                                        | -2 | 8 |
| 230 | Neu5Aca2-3(6S)Galb1-4(Fuca1-3)GlcNAcb-Sp8                                                                                          | -2 | 2 |
| 218 | Neu5Aca2-3Galb1-4GlcNAcb1-3Galb1-4(Fuca1-3)GlcNAcb-Sp0                                                                             | -2 | 5 |
| 287 | Neu5Gca-Sp8                                                                                                                        | -2 | 2 |
| 589 | Galb1-4GlcNAcb1-3Galb1-4GlcNAcb1-3GalNAca-Sp14                                                                                     | -2 | 5 |
| 390 | Fuca1-2Galb1-3GalNAca1-3(Fuca1-2)Galb1-4GlcNAcb-Sp0                                                                                | -2 | 4 |
| 71  | Fuca1-2Galb1-4(Fuca1-3)GlcNAcb-Sp0                                                                                                 | -2 | 3 |
| 276 | Neu5Aca2-8Neu5Aca2-3Galb1-4Glc-Sp0                                                                                                 | -2 | 3 |
| 439 | Galb1-4Galb-Sp10                                                                                                                   | -2 | 1 |
| 51  | Mana1-6(Mana1-3)Manb1-4GlcNAcb1-4GlcNAcb-Sp13                                                                                      | -2 | 1 |
| 360 | Fuca1-2Galb1-3GlcNAcb1-2Mana1-6(Fuca1-2Galb1-3GlcNAcb1-2Mana1-3)Manb1-4GlcNAcb1-4GlcNAcb-Sp20                                      | -2 | 1 |
| 269 | Neu5Aca2-6Galb1-4GlcNAcb-Sp8                                                                                                       | -2 | 2 |
| 157 | Galb1-4GalNAca1-3(Fuca1-2)Galb1-4GlcNAcb-Sp8                                                                                       | -2 | 1 |
| 432 | GlcNAcb1-2Mana1-6(GlcNAcb1-4)(GlcNAcb1-4)(GlcNAcb1-2)Mana1-3)Manb1-4GlcNAcb1-4GlcNAcb-Sp21                                         | -2 | 1 |
| 66  | Fuca1-2Galb1-3GlcNAcb1-3Galb1-4Glc-Sp10                                                                                            | -2 | 4 |
| 526 | Neu5Aca2-3Galb1-3GlcNAcb1-2Mana-Sp0                                                                                                | -2 | 8 |
| 475 | GlcNAcb1-6(GlcNAcb1-2)Mana1-6(GlcNAcb1-2Mana1-3)Manb1-4GlcNAcb1-4(Fuca1-6)GlcNAcb-Sp24                                             | -2 | 3 |
| 75  | Fuca1-2Galb1-4GlcNAcb-Sp0                                                                                                          | -2 | 3 |
| 529 | Neu5Aca2-3Galb1-3GlcNAcb1-4Galb1-4Glc-Sp0                                                                                          | -2 | 6 |
| 296 | 4S(3S)Galb1-4GlcNAcb-Sp0                                                                                                           | -2 | 3 |
| 123 | Gala1-4GlcNAcb-Sp8                                                                                                                 | -2 | 4 |

|     |                                                                                                                                |    |   |
|-----|--------------------------------------------------------------------------------------------------------------------------------|----|---|
| 224 | Neu5Aca2-3Galb1-3GalNAca-Sp14                                                                                                  | -2 | 1 |
| 328 | Neu5,9Ac2a2-3Galb1-4GlcNAcb-Sp0                                                                                                | -2 | 4 |
| 313 | Mana1-6Manb-Sp10                                                                                                               | -2 | 4 |
| 234 | Neu5Aca2-3Galb1-3GalNAcb1-4(Neu5Aca2-3)Galb1-4Glc-Sp0                                                                          | -2 | 1 |
| 329 | Neu5,9Ac2a2-3Galb1-3GlcNAcb-Sp0                                                                                                | -2 | 6 |
| 52  | GlcNAcb1-2Mana1-6(GlcNAcb1-2Mana1-3)Manb1-4GlcNAcb1-4GlcNAcb-Sp12                                                              | -2 | 3 |
| 191 | GlcNAcb1-4GlcNAcb1-4GlcNAcb-Sp8                                                                                                | -2 | 5 |
| 538 | Galb1-3GalNAcb1-3Gal-Sp21                                                                                                      | -2 | 1 |
| 36  | (3S)Galb1-4GlcNAcb-Sp0                                                                                                         | -2 | 4 |
| 17  | GlcNAcb-Sp8                                                                                                                    | -3 | 5 |
| 340 | GlcNAca1-4Galb1-3GlcNAcb-Sp0                                                                                                   | -3 | 3 |
| 221 | Fuca1-2Galb1-4(6S)GlcNAcb-Sp8                                                                                                  | -3 | 2 |
| 595 | GlcNAcb1-3Galb1-4GlcNAcb1-6(GlcNAcb1-3Galb1-4GlcNAcb1-3)GalNAca-Sp14                                                           | -3 | 5 |
| 247 | Neu5Aca2-3Galb1-3GlcNAcb1-3Galb1-4GlcNAcb-Sp0                                                                                  | -3 | 3 |
| 170 | Galb1-4GlcNAcb-Sp23                                                                                                            | -3 | 2 |
| 400 | Fuca1-2Galb1-4GlcNAcb1-3GalNAca-Sp14                                                                                           | -3 | 3 |
| 303 | GlcNAcb1-6(Galb1-4GlcNAcb1-3)Galb1-4GlcNAc-Sp0                                                                                 | -3 | 3 |
| 209 | Mana1-2Mana1-3Mana-Sp9                                                                                                         | -3 | 2 |
| 294 | Neu5Aca2-3Galb1-3GlcNAcb1-3Galb1-3GlcNAcb-Sp0                                                                                  | -3 | 3 |
| 374 | Gala1-3(Fuca1-2)Galb1-3GlcNAcb1-2Mana1-6(Gala1-3(Fuca1-2)Galb1-3GlcNAcb1-2Mana1-3)Manb1-4GlcNAcb1-4GlcNAcb-Sp20                | -3 | 5 |
| 388 | GlcNAcb1-2Mana1-6(GlcNAcb1-4(GlcNAcb1-2)Mana1-3)Manb1-4GlcNAcb1-4GlcNAc-Sp21                                                   | -3 | 5 |
| 62  | Fuca1-2Galb1-3GalNAca-Sp14                                                                                                     | -3 | 5 |
| 267 | Neu5Aca2-6Galb1-4(6S)GlcNAcb-Sp8                                                                                               | -3 | 6 |
| 189 | GlcNAcb1-4GlcNAcb1-4GlcNAcb1-4GlcNAcb1-4GlcNAcb1-4GlcNAcb1-Sp8                                                                 | -3 | 5 |
| 346 | Mana1-6(Neu5Aca2-6Galb1-4GlcNAcb1-2Mana1-3)Manb1-4GlcNAcb1-4GlcNAc-Sp12                                                        | -3 | 3 |
| 599 | Galb1-4GlcNAcb1-3Galb1-3GalNAca-Sp14                                                                                           | -3 | 5 |
| 590 | Galb1-4GlcNAcb1-3Galb1-4GlcNAcb1-6(Galb1-3)GalNAca-Sp14                                                                        | -3 | 1 |
| 167 | Galb1-4GlcNAcb1-6(Galb1-3)GalNAc-Sp14                                                                                          | -3 | 2 |
| 85  | GalNAca1-3(Fuca1-2)Galb1-4GlcNAcb-Sp0                                                                                          | -3 | 4 |
| 222 | Fuca1-2(6S)Galb1-4(6S)Glc-Sp0                                                                                                  | -4 | 1 |
| 442 | GalNAcb1-6GalNAcb-Sp8                                                                                                          | -4 | 4 |
| 531 | Galb1-4GlcNAcb1-2 Mana1-6(GlcNAcb1-4)(Galb1-4GlcNAcb1-2Mana1-3)Manb1-4GlcNAcb1-4(Fuca1-6)GlcNAc-Sp21                           | -4 | 5 |
| 43  | (6S)Galb1-4Glc-Sp8                                                                                                             | -4 | 5 |
| 399 | Neu5Aca2-3Galb1-3GlcNAcb1-3GalNAca-Sp14                                                                                        | -4 | 6 |
| 212 | Mana1-2Mana1-6(Mana1-2Mana1-3)Mana1-6(Mana1-2Mana1-2Mana1-3)Manb1-4GlcNAcb1-4GlcNAcb-Sp12                                      | -4 | 1 |
| 180 | GlcNAcb1-3GalNAca-Sp14                                                                                                         | -4 | 2 |
| 65  | Fuca1-2Galb1-3GlcNAcb1-3Galb1-4Glc-Sp8                                                                                         | -4 | 3 |
| 125 | Galb1-2Galb-Sp8                                                                                                                | -4 | 7 |
| 258 | Neu5Aca2-3Galb1-4GlcNAcb1-3Galb1-4GlcNAcb1-3Galb1-4GlcNAcb-Sp0                                                                 | -4 | 2 |
| 139 | Galb1-3GalNAca-Sp8                                                                                                             | -4 | 4 |
| 592 | Neu5Aca2-3Galb1-4GlcNAcb1-3Galb1-4GlcNAcb1-3GalNAca-Sp14                                                                       | -4 | 2 |
| 207 | Mana1-2Mana1-2Mana1-3Mana-Sp9                                                                                                  | -4 | 6 |
| 457 | GalNAca1-3(Fuca1-2)Galb1-3GlcNAcb1-2Mana1-6(GalNAca1-3(Fuca1-2)Galb1-3GlcNAcb1-2Mana1-3)Manb1-4GlcNAcb1-4(Fuca1-6)GlcNAcb-Sp22 | -4 | 4 |
| 391 | Galb1-3GlcNAcb1-3GalNAca-Sp14                                                                                                  | -4 | 2 |
| 12  | Galb-Sp8                                                                                                                       | -5 | 3 |
| 517 | Galb1-4(6P)GlcNAcb-Sp0                                                                                                         | -5 | 1 |
| 8   | Rhaa-Sp8                                                                                                                       | -5 | 6 |
| 14  | Manb-Sp8                                                                                                                       | -5 | 2 |
| 56  | Neu5Aca2-6Galb1-4GlcNAcb1-2Mana1-6(Neu5Aca2-6Galb1-4GlcNAcb1-2Man-a1-3)Manb1-4GlcNAcb1-4GlcNAcb-Sp21                           | -5 | 2 |

|     |                                                                                                                                                                           |      |    |
|-----|---------------------------------------------------------------------------------------------------------------------------------------------------------------------------|------|----|
| 45  | (6S)Galb1-4(6S)GlcB-Sp8                                                                                                                                                   | -5   | 6  |
| 72  | Fuca1-2Galb1-4(Fuca1-3)GlcNAcb-Sp8                                                                                                                                        | -5   | 1  |
| 110 | Gala1-3GalNAca-Sp8                                                                                                                                                        | -5   | 3  |
| 138 | Neu5Aca2-6(Galb1-3)GlcNAcb1-4Galb1-4GlcB-Sp10                                                                                                                             | -5   | 5  |
| 443 | (6S)Galb1-3GlcNAcb-Sp0                                                                                                                                                    | -5   | 2  |
| 418 | GalNAca1-3(Fuca1-2)Galb1-4(Fuca1-3)GlcNAcb1-3GalNAc-Sp14                                                                                                                  | -5   | 5  |
| 204 | GlcAb1-6Galb-Sp8                                                                                                                                                          | -6   | 9  |
| 68  | Fuca1-2Galb1-3GlcNAcb-Sp8                                                                                                                                                 | -6   | 6  |
| 428 | Galb1-3GlcNAcb1-6(Galb1-3GlcNAcb1-2)Mana1-6(Galb1-3GlcNAcb1-2Mana1-3)Manb1-4GlcNAcb1-4GlcNAcb-Sp19                                                                        | -6   | 3  |
| 41  | (6P)Mana-Sp8                                                                                                                                                              | -6   | 5  |
| 593 | GlcNAcb1-3Galb1-4GlcNAcb1-3GalNAca-Sp14                                                                                                                                   | -6   | 5  |
| 172 | Galb1-4GlcB-Sp8                                                                                                                                                           | -7   | 1  |
| 532 | Galb1-4GlcNAcb1-2 Mana1-6(Galb1-4GlcNAcb1-4)(Galb1-4GlcNAcb1-2Mana1-3)Manb1-4GlcNAcb1-4(Fuca1-6)GlcNAc-Sp21                                                               | -7   | 3  |
| 305 | Galb1-4GlcNAcb1-6Galb1-4GlcNAcb-Sp0                                                                                                                                       | -7   | 5  |
| 520 | Neu5Aca2-6Galb1-4GlcNAcb1-2Man-Sp0                                                                                                                                        | -7   | 7  |
| 445 | Fuca1-2Galb1-4 GlcNAcb1-2Mana1-6(Fuca1-2Galb1-4GlcNAcb1-2(Fuca1-2Galb1-4GlcNAcb1-4)Mana1-3)Manb1-4GlcNAcb1-4GlcNAcb-Sp12                                                  | -7   | 7  |
| 557 | Neu5Aca2-8Neu5Aca2-3Galb1-4GlcNAc-Sp0                                                                                                                                     | -7   | 3  |
| 50  | Mana1-6(Mana1-3)Manb1-4GlcNAcb1-4GlcNAcb-Sp12                                                                                                                             | -7   | 4  |
| 198 | GlcB1-4GlcB-Sp8                                                                                                                                                           | -8   | 5  |
| 440 | Galb1-6Galb-Sp10                                                                                                                                                          | -8   | 2  |
| 30  | (3S)Galb1-3GlcNAcb-Sp0                                                                                                                                                    | -8   | 1  |
| 147 | Galb1-3GlcNAcb1-3Galb1-4GlcNAcb-Sp0                                                                                                                                       | -9   | 2  |
| 603 | Neu5Aca2-3Galb1-4GlcNAcb1-3Galb1-4GlcNAcb1-2Mana1-6(Neu5Aca2-3Galb1-4GlcNAcb1-3Galb1-4GlcNAcb1-2Mana1-3)Manb1-4GlcNAcb1-4GlcNAcb-Sp12                                     | -11  | 3  |
| 596 | Neu5Aca2-3Galb1-4GlcNAcb1-3Galb1-4GlcNAcb1-6(Neu5Aca2-3Galb1-4GlcNAcb1-3Galb1-4GlcNAcb1-3)GalNAca-Sp14                                                                    | -11  | 3  |
| 604 | GlcNAcb1-6(Neu5Aca2-3Galb1-3)GalNAca-Sp14                                                                                                                                 | -12  | 5  |
| 19  | Galb1-4GlcNAcb1-6(Galb1-4GlcNAcb1-3)GalNAca-Sp8                                                                                                                           | -13  | 4  |
| 454 | GalNAca1-3(Fuca1-2)Galb1-4GlcNAcb1-2Mana1-6(GalNAca1-3(Fuca1-2)Galb1-4GlcNAcb1-2Mana1-3)Manb1-4GlcNAcb1-4(Fuca1-6)GlcNAcb-Sp22                                            | -15  | 7  |
| 464 | Neu5Aca2-6Galb1-4GlcNAcb1-4Mana1-6(GlcNAcb1-4)(Neu5Aca2-6Galb1-4GlcNAcb1-4(Neu5Aca2-6Galb1-4GlcNAcb1-2)Mana1-3)Manb1-4GlcNAcb1-4GlcNAcb-Sp21                              | -18  | 13 |
| 264 | Neu5Aca2-3Galb1-4GlcB-Sp8                                                                                                                                                 | -18  | 5  |
| 471 | Neu5Aca2-3Galb1-4GlcNAcb1-6(Neu5Aca2-3Galb1-4GlcNAcb1-3)GalNAca-Sp14                                                                                                      | -28  | 13 |
| 182 | GlcNAcb1-3Galb1-4GlcNAcb-Sp0                                                                                                                                              | -28  | 8  |
| 103 | Gala1-3(Fuca1-2)Galb1-4(Fuca1-3)GlcNAcb-Sp0                                                                                                                               | -31  | 19 |
| 444 | (6S)Galb1-3(6S)GlcNAc-Sp0                                                                                                                                                 | -32  | 12 |
| 441 | Neu5Aca2-3Galb1-4GlcNAcb1-3Galb-Sp8                                                                                                                                       | -40  | 5  |
| 21  | GlcNAcb1-6(GlcNAcb1-4)(GlcNAcb1-3)GlcNAc-Sp8                                                                                                                              | -42  | 9  |
| 597 | Neu5Aca2-6Galb1-4GlcNAcb1-3Galb1-4GlcNAcb1-3GalNAca-Sp14                                                                                                                  | -53  | 6  |
| 466 | Neu5Aca2-6Galb1-4GlcNAcb1-6(Neu5Aca2-6Galb1-4GlcNAcb1-2)Mana1-6(GlcNAcb1-4)(Neu5Aca2-6Galb1-4GlcNAcb1-4(Neu5Aca2-6Galb1-4GlcNAcb1-2)Mana1-3)Manb1-4GlcNAcb1-4GlcNAcb-Sp21 | -76  | 32 |
| 31  | (3S)Galb1-3GlcNAcb-Sp8                                                                                                                                                    | -172 | 11 |

| <b>Glycan Number</b> | <b>Rank order at 10 µg/ml</b>                                                                                         | <b>Average RFU</b> | <b>Standard deviation</b> |
|----------------------|-----------------------------------------------------------------------------------------------------------------------|--------------------|---------------------------|
| 519                  | GalNAca1-3(Fuca1-2)Galb1-4GlcNAcb1-6GalNAc-Sp14                                                                       | 21255              | 771                       |
| 192                  | GlcNAcb1-6GalNAca-Sp8                                                                                                 | 16789              | 7440                      |
| 4                    | GalNAca-Sp8                                                                                                           | 13699              | 7427                      |
| 265                  | Neu5Aca2-6GalNAca-Sp8                                                                                                 | 8941               | 4208                      |
| 495                  | Gala1-3Galb1-4GlcNAcb1-6GalNAca-Sp14                                                                                  | 6814               | 1552                      |
| 514                  | GalNAcb1-4(6S)GlcNAc-Sp8                                                                                              | 6429               | 3163                      |
| 408                  | GalNAcb1-3Gala1-6Galb1-4Glc-Sp8                                                                                       | 4034               | 76                        |
| 563                  | GalNAcb1-4GlcNAcb1-3GalNAcb1-4GlcNAcb-Sp0                                                                             | 4001               | 303                       |
| 131                  | Galb1-4GlcNAcb1-6GalNAca-Sp8                                                                                          | 3965               | 232                       |
| 7                    | Fuca-Sp9                                                                                                              | 3700               | 887                       |
| 334                  | GalNAcb1-3Gala1-4Galb1-4GlcNAcb1-3Galb1-4Glc-Sp0                                                                      | 3625               | 169                       |
| 506                  | GalNAca1-3(Fuca1-2)Galb1-3GlcNAcb1-6GalNAca-Sp14                                                                      | 3438               | 166                       |
| 494                  | Fuca1-2Galb1-4GlcNAcb1-6GalNAca-Sp14                                                                                  | 3356               | 144                       |
| 562                  | GalNAcb1-3GlcNAcb-Sp0                                                                                                 | 3279               | 152                       |
| 306                  | GalNAcb1-3Galb-Sp8                                                                                                    | 3082               | 161                       |
| 15                   | GalNAcb-Sp8                                                                                                           | 2736               | 332                       |
| 193                  | GlcNAcb1-6GalNAca-Sp14                                                                                                | 2618               | 74                        |
| 491                  | Neu5Aca2-3Galb1-3GlcNAcb1-6GalNAca-Sp14                                                                               | 2566               | 146                       |
| 93                   | GalNAca1-4(Fuca1-2)Galb1-4GlcNAcb-Sp8                                                                                 | 2438               | 56                        |
| 528                  | GalNAcb1-4GlcNAcb1-2Mana-Sp0                                                                                          | 2284               | 84                        |
| 97                   | GalNAcb1-4(Fuca1-3)GlcNAcb-Sp0                                                                                        | 2249               | 174                       |
| 95                   | GalNAcb1-3(Fuca1-2)Galb-Sp8                                                                                           | 2157               | 241                       |
| 479                  | Neu5Aca2-3Galb1-4GlcNAcb1-6GalNAca-Sp14                                                                               | 2048               | 157                       |
| 92                   | GalNAca1-3Galb-Sp8                                                                                                    | 1971               | 47                        |
| 489                  | Gala1-3Galb1-3GlcNAcb1-6GalNAca-Sp14                                                                                  | 1963               | 239                       |
| 525                  | Gala1-3(Fuca1-2)Galb1-3GlcNAcb1-6GalNAc-Sp14                                                                          | 1938               | 133                       |
| 98                   | GalNAcb1-4GlcNAcb-Sp0                                                                                                 | 1898               | 316                       |
| 266                  | Neu5Aca2-6GalNAcb1-4GlcNAcb-Sp0                                                                                       | 1867               | 59                        |
| 488                  | Galb1-3GlcNAcb1-6GalNAca-Sp14                                                                                         | 1818               | 164                       |
| 503                  | GalNAcb1-4(Fuca1-3)(6S)GlcNAcb-Sp8                                                                                    | 1742               | 456                       |
| 5                    | GalNAca-Sp15                                                                                                          | 1515               | 134                       |
| 285                  | Neu5Gca2-6GalNAca-Sp0                                                                                                 | 1481               | 91                        |
| 225                  | GalNAcb1-4(Neu5Aca2-8Neu5Aca2-8Neu5Aca2-8Neu5Aca2-3)Galb1-4Glc-Sp0                                                    | 1481               | 17                        |
| 233                  | GalNAcb1-4(Neu5Aca2-3)Galb1-4Glc-Sp0                                                                                  | 1446               | 49                        |
| 512                  | (6S)GalNAcb1-4GlcNAc-Sp8                                                                                              | 1426               | 282                       |
| 96                   | GalNAcb1-3Gala1-4Galb1-4GlcNAcb-Sp0                                                                                   | 1380               | 111                       |
| 373                  | GalNAca1-3(Fuca1-2)Galb1-3GlcNAcb1-2Mana1-6(GalNAca1-3(Fuca1-2)Galb1-3GlcNAcb1-2Mana1-3)Manb1-4GlcNAcb1-4GlcNAcb-Sp20 | 1323               | 102                       |
| 86                   | GalNAca1-3(Fuca1-2)Galb1-4GlcNAcb-Sp8                                                                                 | 1287               | 89                        |
| 228                  | GalNAcb1-4(Neu5Aca2-8Neu5Aca2-3)Galb1-4Glc-Sp0                                                                        | 1236               | 100                       |
| 232                  | GalNAcb1-4(Neu5Aca2-3)Galb1-4GlcNAcb-Sp8                                                                              | 1177               | 68                        |
| 226                  | GalNAcb1-4(Neu5Aca2-8Neu5Aca2-8Neu5Aca2-3)Galb1-4Glc-Sp0                                                              | 1159               | 50                        |
| 379                  | GalNAcb1-4GlcNAcb1-2Mana1-6(GalNAcb1-4GlcNAcb1-2Mana1-3)Manb1-4GlcNAcb1-4GlcNAc-Sp12                                  | 968                | 96                        |
| 132                  | Galb1-4GlcNAcb1-6GalNAc-Sp14                                                                                          | 909                | 90                        |
| 335                  | GalNAca1-3(Fuca1-2)Galb1-4GlcNAcb1-3Galb1-4GlcNAcb-Sp0                                                                | 835                | 18                        |
| 82                   | GalNAca1-3(Fuca1-2)Galb1-3GlcNAcb-Sp0                                                                                 | 802                | 76                        |
| 90                   | GalNAca1-3(Fuca1-2)Galb-Sp18                                                                                          | 758                | 203                       |
| 523                  | GalNAca1-3(Fuca1-2)Galb1-4 GlcNAcb1-2Mana-Sp0                                                                         | 693                | 25                        |

|     |                                                                                                                                                                                                                                               |     |     |
|-----|-----------------------------------------------------------------------------------------------------------------------------------------------------------------------------------------------------------------------------------------------|-----|-----|
| 89  | GalNAca1-3(Fuca1-2)Galb-Sp8                                                                                                                                                                                                                   | 677 | 50  |
| 231 | GalNAcb1-4(Neu5Aca2-3)Galb1-4GlcNAcb-Sp0                                                                                                                                                                                                      | 639 | 39  |
| 502 | Neu5Aca2-6GalNAcb1-4(6S)GlcNAcb-Sp8                                                                                                                                                                                                           | 575 | 37  |
| 447 | Galb1-4(Fuca1-3)GlcNAcb1-6GalNAc-Sp14                                                                                                                                                                                                         | 571 | 21  |
| 91  | GalNAca1-3GalNAcb-Sp8                                                                                                                                                                                                                         | 548 | 49  |
| 87  | GalNAca1-3(Fuca1-2)Galb1-4Glc-Sp0                                                                                                                                                                                                             | 538 | 71  |
| 415 | GalNAca1-3GalNAcb1-3Gala1-4Galb1-4Glc-Sp0                                                                                                                                                                                                     | 536 | 40  |
| 490 | Galb1-3(Fuca1-4)GlcNAcb1-6GalNAca-Sp14                                                                                                                                                                                                        | 535 | 26  |
| 336 | GalNAca1-3(Fuca1-2)Galb1-4GlcNAcb1-3Galb1-4GlcNAcb1-3Galb1-4GlcNAcb-Sp0                                                                                                                                                                       | 498 | 74  |
| 536 | GalNAca1-3(Fuca1-2)Galb1-3GalNAcb1-3Gala1-4Galb1-4Glc-Sp21                                                                                                                                                                                    | 487 | 70  |
| 402 | GalNAca1-3GalNAcb1-3Gala1-4Galb1-4GlcNAcb-Sp0                                                                                                                                                                                                 | 471 | 40  |
| 411 | Galb1-3GalNAcb1-4(Neu5Aca2-8Neu5Aca2-3)Galb1-4Glc-Sp0                                                                                                                                                                                         | 453 | 21  |
| 370 | GalNAca1-3(Fuca1-2)Galb1-4GlcNAcb1-2Mana1-6(GalNAca1-3(Fuca1-2)Galb1-4GlcNAcb1-2Mana1-3)Manb1-4GlcNAcb1-4GlcNAcb-Sp20                                                                                                                         | 452 | 41  |
| 94  | GalNAcb1-3GalNAca-Sp8                                                                                                                                                                                                                         | 430 | 15  |
| 99  | GalNAcb1-4GlcNAcb-Sp8                                                                                                                                                                                                                         | 423 | 362 |
| 451 | GalNAca1-3(Fuca1-2)Galb1-4GlcNAcb1-6(GalNAca1-3(Fuca1-2)Galb1-4GlcNAcb1-3)GalNAc-Sp14                                                                                                                                                         | 422 | 26  |
| 392 | GalNAcb1-4(Neu5Aca2-3)Galb1-4GlcNAcb1-3GalNAca-Sp14                                                                                                                                                                                           | 399 | 47  |
| 144 | Galb1-3GalNAcb1-4(Neu5Aca2-3)Galb1-4Glc-Sp0                                                                                                                                                                                                   | 378 | 36  |
| 143 | Galb1-3GalNAcb1-3Gala1-4Galb1-4Glc-Sp0                                                                                                                                                                                                        | 330 | 37  |
| 393 | GalNAca1-3(Fuca1-2)Galb1-3GalNAca1-3(Fuca1-2)Galb1-4GlcNAcb-Sp0                                                                                                                                                                               | 308 | 214 |
| 282 | Neu5Gca2-3Galb1-4(Fuca1-3)GlcNAcb-Sp0                                                                                                                                                                                                         | 284 | 22  |
| 424 | GalNAca1-3(Fuca1-2)Galb1-3GlcNAcb1-3GalNAc-Sp14                                                                                                                                                                                               | 242 | 42  |
| 63  | Fuca1-2Galb1-3GalNAcb1-4(Neu5Aca2-3)Galb1-4Glc-Sp0                                                                                                                                                                                            | 223 | 15  |
| 278 | Neu5Acb2-6GalNAca-Sp8                                                                                                                                                                                                                         | 166 | 35  |
| 414 | GalNAca1-3(Fuca1-2)Galb1-4GlcNAcb1-3GalNAca-Sp14                                                                                                                                                                                              | 163 | 48  |
| 83  | GalNAca1-3(Fuca1-2)Galb1-4(Fuca1-3)GlcNAcb-Sp0                                                                                                                                                                                                | 149 | 39  |
| 448 | Galb1-4GlcNAcb1-2Mana-Sp0                                                                                                                                                                                                                     | 149 | 19  |
| 85  | GalNAca1-3(Fuca1-2)Galb1-4GlcNAcb-Sp0                                                                                                                                                                                                         | 93  | 16  |
| 166 | Galb1-4GlcNAcb1-6(Galb1-3)GalNAca-Sp8                                                                                                                                                                                                         | 91  | 23  |
| 559 | Galb1-4GlcNAcb1-3Galb1-4GlcNAcb1-6(Galb1-4GlcNAcb1-3Galb1-4GlcNAcb1-2)Mana1-6(Galb1-4GlcNAcb1-3Galb1-4GlcNAcb1-2Mana1-3)Mana1-4GlcNAcb1-4GlcNAc-Sp24                                                                                          | 62  | 10  |
| 244 | Neu5Aca2-6(Neu5Aca2-3Galb1-3)GalNAca-Sp14                                                                                                                                                                                                     | 54  | 5   |
| 236 | Neu5Aca2-3GalNAca-Sp8                                                                                                                                                                                                                         | 48  | 18  |
| 377 | Neu5Aca2-6Galb1-4GlcNAcb1-3GalNAc-Sp14                                                                                                                                                                                                        | 43  | 12  |
| 572 | Galb1-3GlcNAcb1-3Galb1-4GlcNAcb1-6(Galb1-3GlcNAcb1-3Galb1-4GlcNAcb1-2)Mana1-6(Galb1-3GlcNAcb1-3Galb1-4GlcNAcb1-2Mana1-3)Manb1-4GlcNAcb1-4(Fuca1-6)GlcNAcb-Sp24                                                                                | 42  | 4   |
| 587 | GlcNAcb1-3Galb1-4GlcNAcb1-3Galb1-4GlcNAcb1-3Galb1-4GlcNAcb1-3Galb1-4GlcNAcb1-6(GlcNAcb1-3Galb1-4GlcNAcb1-3Galb1-4GlcNAcb1-3Galb1-4GlcNAcb1-3Galb1-4GlcNAcb1-3Galb1-4GlcNAcb1-3Galb1-4GlcNAcb1-2Mana1-3)Manb1-4GlcNAcb1-4(Fuca1-6)GlcNAcb-Sp24 | 39  | 11  |
| 16  | GlcNAcb-Sp0                                                                                                                                                                                                                                   | 39  | 22  |
| 3   | Mana-Sp8                                                                                                                                                                                                                                      | 38  | 19  |
| 547 | Galb1-4GlcNAcb1-3Galb1-4GlcNAcb1-3Galb1-4GlcNAcb1-2Mana1-6(Galb1-4GlcNAcb1-3Galb1-4GlcNAcb1-3Galb1-4GlcNAcb1-2Mana1-3)Manb1-4GlcNAcb1-4GlcNAcb-Sp12                                                                                           | 37  | 9   |
| 478 | Neu5Aca2-3Galb1-4GlcNAcb1-2Mana-Sp0                                                                                                                                                                                                           | 35  | 14  |
| 111 | Gala1-3GalNAca-Sp16                                                                                                                                                                                                                           | 33  | 12  |
| 52  | GlcNAcb1-2Mana1-6(GlcNAcb1-2Mana1-3)Manb1-4GlcNAcb1-4GlcNAcb-Sp12                                                                                                                                                                             | 33  | 21  |
| 550 | Galb1-4GlcNAcb1-3Galb1-4GlcNAcb1-3Galb1-4GlcNAcb1-3Galb1-4GlcNAcb1-2Mana1-6(Galb1-4GlcNAcb1-3Galb1-4GlcNAcb1-3Galb1-4GlcNAcb1-3Galb1-4GlcNAcb1-2Mana1-3)Manb1-4GlcNAcb1-4GlcNAcb-Sp25                                                         | 33  | 14  |
| 187 | GlcNAcb1-6(GlcNAcb1-4)GalNAca-Sp8                                                                                                                                                                                                             | 33  | 10  |
| 378 | Neu5Aca2-3Galb1-4(Fuca1-3)GlcNAcb1-3GalNAca-Sp14                                                                                                                                                                                              | 32  | 14  |
| 446 | Fuca1-2Galb1-4(Fuca1-3)GlcNAcb1-2Mana1-6(Fuca1-2Galb1-4(Fuca1-3)GlcNAcb1-4(Fuca1-2Galb1-4(Fuca1-3)GlcNAcb1-2)Mana1-3)Manb1-4GlcNAcb1-4GlcNAcb-Sp12                                                                                            | 31  | 19  |
| 129 | Galb1-3(Fuca1-4)GlcNAc-Sp8                                                                                                                                                                                                                    | 30  | 21  |
| 304 | Galb1-4GlcNAca1-6Galb1-4GlcNAcb-Sp0                                                                                                                                                                                                           | 30  | 29  |

|     |                                                                                                                                                                                                                                                                                                                         |    |    |
|-----|-------------------------------------------------------------------------------------------------------------------------------------------------------------------------------------------------------------------------------------------------------------------------------------------------------------------------|----|----|
| 175 | GlcNAcb1-2Galb1-3GalNAca-Sp8                                                                                                                                                                                                                                                                                            | 29 | 19 |
| 565 | Galb1-4GlcNAcb1-3Galb1-4GlcNAcb1-3Galb1-4GlcNAcb1-3Galb1-4GlcNAcb1-2Mana1-6(Galb1-4GlcNAcb1-3Galb1-4GlcNAcb1-3Galb1-4GlcNAcb1-3Galb1-4GlcNAcb1-3Galb1-4GlcNAcb1-2Mana1-3)Manb1-4GlcNAcb1-4GlcNAcb-Sp25                                                                                                                  | 29 | 21 |
| 571 | Galb1-3GlcNAcb1-3Galb1-4GlcNAcb1-3Galb1-4GlcNAcb1-6(Galb1-3GlcNAcb1-3Galb1-4GlcNAcb1-3Galb1-4GlcNAcb1-2)Mana1-6(Galb1-3GlcNAcb1-3Galb1-4GlcNAcb1-3Galb1-4GlcNAcb1-2Mana1-3)Manb1-4GlcNAcb1-4(Fuca1-6)GlcNAcb-Sp24                                                                                                       | 29 | 4  |
| 568 | Galb1-4GlcNAcb1-3Galb1-4GlcNAcb1-3Galb1-4GlcNAcb1-3Galb1-4GlcNAcb1-3Galb1-4GlcNAcb1-2Mana1-6(Galb1-4GlcNAcb1-3Galb1-4GlcNAcb1-3Galb1-4GlcNAcb1-3Galb1-4GlcNAcb1-3Galb1-4GlcNAcb1-2Mana1-3)Manb1-4GlcNAcb1-4GlcNAcb-Sp25                                                                                                 | 29 | 8  |
| 548 | Galb1-4GlcNAcb1-3Galb1-4GlcNAcb1-3Galb1-4GlcNAcb1-2Mana1-6(Galb1-4GlcNAcb1-3Galb1-4GlcNAcb1-3Galb1-4GlcNAcb1-2Mana1-3)Manb1-4GlcNAcb1-4GlcNAcb-Sp24                                                                                                                                                                     | 28 | 8  |
| 588 | Galb1-4GlcNAcb1-3Galb1-4GlcNAcb1-3Galb1-4GlcNAcb1-3Galb1-4GlcNAcb1-3Galb1-4GlcNAcb1-6(Galb1-4GlcNAcb1-3Galb1-4GlcNAcb1-3Galb1-4GlcNAcb1-3Galb1-4GlcNAcb1-3Galb1-4GlcNAcb1-3Galb1-4GlcNAcb1-2)Mana1-6(Galb1-4GlcNAcb1-3Galb1-4GlcNAcb1-3Galb1-4GlcNAcb1-3Galb1-4GlcNAcb1-2Mana1-3)Manb1-4GlcNAcb1-4(Fuca1-6)GlcNAcb-Sp24 | 27 | 8  |
| 367 | Neu5Aca2-6GlcNAcb1-4GlcNAcb1-4GlcNAc-Sp21                                                                                                                                                                                                                                                                               | 27 | 17 |
| 362 | Fuca1-2Galb1-4(Fuca1-3)GlcNAcb1-2Mana1-6(Fuca1-2Galb1-4(Fuca1-3)GlcNAcb1-2Mana1-3)Manb1-4GlcNAcb1-4GlcNAcb-Sp20                                                                                                                                                                                                         | 27 | 6  |
| 387 | Galb1-4GlcNAcb1-6(Galb1-4GlcNAcb1-2)Mana1-6(Galb1-4GlcNAcb1-4(Galb1-4GlcNAcb1-2)Mana1-3)Manb1-4GlcNAcb1-4GlcNAcb-Sp21                                                                                                                                                                                                   | 27 | 7  |
| 161 | Galb1-4GlcNAcb1-3Galb1-4(Fuca1-3)GlcNAcb1-3Galb1-4(Fuca1-3)GlcNAcb-Sp0                                                                                                                                                                                                                                                  | 27 | 7  |
| 39  | (6S)(4S)Galb1-4GlcNAcb-Sp0                                                                                                                                                                                                                                                                                              | 26 | 9  |
| 472 | Fuca1-2Galb1-4(Fuca1-3)GlcNAcb1-2Mana1-6(Fuca1-2Galb1-4(Fuca1-3)GlcNAcb1-2Mana1-3)Manb1-4GlcNAcb1-4(Fuca1-6)GlcNAcb-Sp24                                                                                                                                                                                                | 26 | 10 |
| 290 | Galb1-4(Fuca1-3)(6S)GlcNAcb-Sp0                                                                                                                                                                                                                                                                                         | 26 | 5  |
| 199 | Glc1-6Glc-Sp8                                                                                                                                                                                                                                                                                                           | 26 | 8  |
| 263 | Neu5Aca2-3Galb1-4Glc-Sp0                                                                                                                                                                                                                                                                                                | 26 | 8  |
| 590 | Galb1-4GlcNAcb1-3Galb1-4GlcNAcb1-6(Galb1-3)GalNAca-Sp14                                                                                                                                                                                                                                                                 | 26 | 9  |
| 583 | GlcNAcb1-3Galb1-4GlcNAcb1-3Galb1-4GlcNAcb1-6(GlcNAcb1-3Galb1-4GlcNAcb1-3Galb1-4GlcNAcb1-2)Mana1-6(GlcNAcb1-3Galb1-4GlcNAcb1-3Galb1-4GlcNAcb1-2Mana1-3)Manb1-4GlcNAcb1-4(Fuca1-6)GlcNAcb-Sp24                                                                                                                            | 26 | 2  |
| 69  | Fuca1-2Galb1-4(Fuca1-3)GlcNAcb1-3Galb1-4(Fuca1-3)GlcNAcb-Sp0                                                                                                                                                                                                                                                            | 25 | 12 |
| 42  | (6S)Galb1-4Glc-Sp0                                                                                                                                                                                                                                                                                                      | 25 | 12 |
| 606 | Neu5Aca2-6Galb1-4GlcNAcb1-3Galb1-4GlcNAcb1-3Galb1-4GlcNAcb1-2Mana1-6(Neu5Aca2-6Galb1-4GlcNAcb1-3Galb1-4GlcNAcb1-3Galb1-4GlcNAcb1-2Mana1-3)Manb1-4GlcNAcb1-4GlcNAcb-Sp12                                                                                                                                                 | 25 | 13 |
| 541 | Galb1-4GlcNAcb1-3Galb1-4GlcNAcb1-2Mana1-6(Galb1-4GlcNAcb1-3Galb1-4GlcNAcb1-2Mana1-3)Manb1-4GlcNAcb1-4GlcNAcb-Sp12                                                                                                                                                                                                       | 25 | 4  |
| 77  | Fuca1-2Galb1-4Glc-Sp0                                                                                                                                                                                                                                                                                                   | 25 | 11 |
| 331 | Neu5Aca2-3Galb1-3(Fuca1-4)GlcNAcb1-3Galb1-3(Fuca1-4)GlcNAcb-Sp0                                                                                                                                                                                                                                                         | 25 | 5  |
| 88  | GlcNAcb1-3Galb1-3GalNAca-Sp8                                                                                                                                                                                                                                                                                            | 25 | 17 |
| 311 | GlcNAcb1-4GlcNAcb-Sp12                                                                                                                                                                                                                                                                                                  | 24 | 9  |
| 191 | GlcNAcb1-4GlcNAcb1-4GlcNAcb-Sp8                                                                                                                                                                                                                                                                                         | 24 | 11 |
| 329 | Neu5,9Ac2a2-3Galb1-3GlcNAcb-Sp0                                                                                                                                                                                                                                                                                         | 24 | 10 |
| 254 | Neu5Aca2-3Galb1-4(Fuca1-3)GlcNAcb-Sp0                                                                                                                                                                                                                                                                                   | 24 | 15 |
| 62  | Fuca1-2Galb1-3GalNAca-Sp14                                                                                                                                                                                                                                                                                              | 24 | 12 |
| 538 | Galb1-3GalNAcb1-3Gal-Sp21                                                                                                                                                                                                                                                                                               | 24 | 17 |
| 474 | Neu5Aca2-3Galb1-3GlcNAcb1-6(Neu5Aca2-3Galb1-3GlcNAcb1-2)Mana1-6(Neu5Aca2-3Galb1-3GlcNAcb1-2Mana1-3)Manb1-4GlcNAcb1-4GlcNAcb-Sp19                                                                                                                                                                                        | 24 | 11 |
| 253 | Neu5Aca2-3Galb1-4(Fuca1-3)GlcNAcb1-3Galb1-4(Fuca1-3)GlcNAcb1-3Galb1-4(Fuca1-3)GlcNAcb-Sp0                                                                                                                                                                                                                               | 24 | 17 |
| 421 | GlcNAcb1-2(GlcNAcb1-6)Mana1-6(GlcNAcb1-2Mana1-3)Manb1-4GlcNAcb1-4GlcNAcb-Sp19                                                                                                                                                                                                                                           | 23 | 16 |
| 137 | Neu5Acb2-6(Galb1-3)GalNAca-Sp8                                                                                                                                                                                                                                                                                          | 23 | 9  |
| 399 | Neu5Aca2-3Galb1-3GlcNAcb1-3GalNAca-Sp14                                                                                                                                                                                                                                                                                 | 23 | 14 |
| 205 | KDNa2-3Galb1-3GlcNAcb-Sp0                                                                                                                                                                                                                                                                                               | 23 | 8  |
| 521 | Gala1-3Galb1-4GlcNAcb1-2Mana-Sp0                                                                                                                                                                                                                                                                                        | 23 | 10 |
| 320 | GlcNAcb1-2Mana1-6(Neu5Aca2-6Galb1-4GlcNAcb1-2Mana1-3)Manb1-4GlcNAcb1-4GlcNAcb-Sp12                                                                                                                                                                                                                                      | 23 | 10 |
| 543 | Neu5Gca2-3Galb1-4GlcNAcb1-3Galb1-4GlcNAcb1-2Mana1-6(Neu5Gca2-3Galb1-4GlcNAcb1-3Galb1-4GlcNAcb1-2Mana1-3)Manb1-4GlcNAcb1-4GlcNAcb-Sp24                                                                                                                                                                                   | 23 | 14 |
| 485 | Galb1-4GlcNAcb1-6(Galb1-4GlcNAcb1-2)Mana1-6(Galb1-4GlcNAcb1-2Mana1-3)Manb1-4GlcNAcb1-4(Fuca1-6)GlcNAcb-Sp24                                                                                                                                                                                                             | 23 | 15 |
| 420 | Fuca1-2Galb1-4GlcNAcb1-2Mana1-6(Fuca1-2Galb1-4GlcNAcb1-2Mana1-3)Manb1-4GlcNAcb1-4(Fuca1-6)GlcNAcb-Sp22                                                                                                                                                                                                                  | 23 | 11 |
| 155 | Galb1-4(6S)Glc-Sp0                                                                                                                                                                                                                                                                                                      | 23 | 19 |
| 375 | Fuca1-4(Fuca1-2Galb1-3)GlcNAcb1-2Mana1-3(Fuca1-4(Fuca1-2Galb1-3)GlcNAcb1-2Mana1-3)Manb1-4GlcNAcb1-4GlcNAcb-Sp19                                                                                                                                                                                                         | 22 | 19 |
| 585 | GlcNAcb1-3Galb1-4GlcNAcb1-3Galb1-4GlcNAcb1-3Galb1-4GlcNAcb1-6(GlcNAcb1-3Galb1-4GlcNAcb1-3Galb1-4GlcNAcb1-3Galb1-4GlcNAcb1-3Galb1-4GlcNAcb1-2)Mana1-6(GlcNAcb1-3Galb1-4GlcNAcb1-3Galb1-4GlcNAcb1-3Galb1-4GlcNAcb1-2)Mana1-3)Manb1-4GlcNAcb1-4(Fuca1-6)GlcNAcb-Sp24                                                       | 22 | 6  |





|     |                                                                                                                                                                                                            |    |    |
|-----|------------------------------------------------------------------------------------------------------------------------------------------------------------------------------------------------------------|----|----|
| 364 | Galb1-4GlcNAcb1-2Mana1-6(Mana1-3)Manb1-4GlcNAcb1-4GlcNAcb-Sp12                                                                                                                                             | 19 | 14 |
| 235 | Neu5Aca2-6(Neu5Aca2-3)GalNAca-Sp8                                                                                                                                                                          | 18 | 6  |
| 356 | KDNa2-3Galb1-4(Fuca1-3)GlcNAc-Sp0                                                                                                                                                                          | 18 | 12 |
| 55  | Neu5Aca2-6Galb1-4GlcNAcb1-2Mana1-6(Neu5Aca2-6Galb1-4GlcNAcb1-2Mana1-3)Manb1-4GlcNAcb1-4GlcNAcb-Sp12                                                                                                        | 18 | 9  |
| 27  | (3S)Galb1-4(6S)Glc-Sp8                                                                                                                                                                                     | 18 | 6  |
| 553 | Neu5Aca2-8Neu5Gca2-3Galb1-4GlcNAc-Sp0                                                                                                                                                                      | 18 | 4  |
| 576 | GlcNAcb1-3Galb1-4GlcNAcb1-3Galb1-4GlcNAcb1-2Mana1-6(GlcNAcb1-3Galb1-4GlcNAcb1-3Galb1-4GlcNAcb1-2Mana1-3)Manb1-4GlcNAcb1-4(Fuca1-6)GlcNAcb-Sp24                                                             | 18 | 4  |
| 374 | Gala1-3(Fuca1-2)Galb1-3GlcNAcb1-2Mana1-6(Gala1-3(Fuca1-2)Galb1-3GlcNAcb1-2Mana1-3)Manb1-4GlcNAcb1-4GlcNAcb-Sp20                                                                                            | 18 | 4  |
| 24  | (3S)Galb1-4(Fuca1-3)(6S)Glc-Sp0                                                                                                                                                                            | 18 | 1  |
| 484 | Mana1-6(Mana1-3)Manb1-4GlcNAcb1-4(Fuca1-6)GlcNAcb-Sp19                                                                                                                                                     | 18 | 4  |
| 605 | Neu5Aca2-6Galb1-4GlcNAcb1-3Galb1-4GlcNAcb1-6(Neu5Aca2-6Galb1-4GlcNAcb1-3Galb1-4GlcNAcb1-3)GalNAca-Sp14                                                                                                     | 18 | 11 |
| 570 | (3S)GlcAb1-3Galb1-4GlcNAcb1-2Mana-Sp0                                                                                                                                                                      | 18 | 7  |
| 2   | Glca-Sp8                                                                                                                                                                                                   | 18 | 8  |
| 566 | GlcNAb1-3Galb1-3GalNAc-Sp14                                                                                                                                                                                | 18 | 9  |
| 28  | (3S)Galb1-3(Fuca1-4)GlcNAcb-Sp8                                                                                                                                                                            | 18 | 5  |
| 578 | GlcNAcb1-3Galb1-4GlcNAcb1-3Galb1-4GlcNAcb1-3Galb1-4GlcNAcb1-2Mana1-6(GlcNAcb1-3Galb1-4GlcNAcb1-3Galb1-4GlcNAcb1-3Galb1-4GlcNAcb1-2Mana1-3)Manb1-4GlcNAcb1-4(Fuca1-6)GlcNAcb-Sp24                           | 18 | 8  |
| 481 | Neu5Aca2-6Galb1-4GlcNAcb1-6(Neu5Aca2-6Galb1-4GlcNAcb1-3)GalNAca-Sp14                                                                                                                                       | 18 | 6  |
| 584 | Galb1-4GlcNAcb1-3Galb1-4GlcNAcb1-3Galb1-4GlcNAcb1-6(Galb1-4GlcNAcb1-3Galb1-4GlcNAcb1-3Galb1-4GlcNAcb1-2)Mana1-6(Galb1-4GlcNAcb1-3Galb1-4GlcNAcb1-3Galb1-4GlcNAcb1-2)Manb1-4GlcNAcb1-4(Fuca1-6)GlcNAcb-Sp24 | 18 | 6  |
| 339 | GlcNAca1-4Galb1-4GlcNAcb-Sp0                                                                                                                                                                               | 18 | 6  |
| 353 | Galb1-4GlcNAcb1-2Mana1-6(Galb1-4GlcNAcb1-2Mana1-3)Manb1-4GlcNAcb1-4(Fuca1-6)GlcNAcb-Sp22                                                                                                                   | 18 | 6  |
| 343 | GlcNAca1-4Galb1-4GlcNAcb1-3Galb1-4GlcNAcb-Sp0                                                                                                                                                              | 18 | 12 |
| 310 | GlcNAcb1-4GlcNAcb-Sp10                                                                                                                                                                                     | 18 | 17 |
| 29  | (3S)Galb1-3GalNAca-Sp8                                                                                                                                                                                     | 17 | 12 |
| 384 | Galb1-4GlcNAcb1-6(Fuca1-4(Fuca1-2Galb1-3)GlcNAcb1-3)Galb1-4Glc-Sp21                                                                                                                                        | 17 | 14 |
| 241 | Neu5Aca2-3Galb1-4(Neu5Aca2-3Galb1-3)GlcNAcb-Sp8                                                                                                                                                            | 17 | 7  |
| 509 | Galb1-3GlcNAca1-3Galb1-4GlcNAcb-Sp8                                                                                                                                                                        | 17 | 12 |
| 299 | Neu5Aca2-3Galb1-4(Fuca1-3)GlcNAcb1-6(Galb1-3)GalNAca-Sp14                                                                                                                                                  | 17 | 8  |
| 250 | Neu5Aca2-3Galb1-3GlcNAcb-Sp8                                                                                                                                                                               | 17 | 13 |
| 104 | Gala1-3(Fuca1-2)Galb1-4(Fuca1-3)GlcNAcb-Sp8                                                                                                                                                                | 17 | 6  |
| 591 | Galb1-4GlcNAcb1-3Galb1-4GlcNAcb1-6(Galb1-4GlcNAcb1-3Galb1-4GlcNAcb1-3)GalNAca-Sp14                                                                                                                         | 17 | 7  |
| 473 | Fuca1-2Galb1-3(Fuca1-4)GlcNAcb1-2Mana1-6(Fuca1-2Galb1-3(Fuca1-4)GlcNAcb1-2Mana1-3)Manb1-4GlcNAcb1-4(Fuca1-6)GlcNAcb1-4(Fuca1-6)GlcNAcb-Sp19                                                                | 17 | 3  |
| 153 | Galb1-4(Fuca1-3)GlcNAcb1-3Galb1-4(Fuca1-3)GlcNAcb-Sp0                                                                                                                                                      | 17 | 7  |
| 268 | Neu5Aca2-6Galb1-4GlcNAcb-Sp0                                                                                                                                                                               | 17 | 1  |
| 524 | Galb1-3GlcNAcb1-2Mana-Sp0                                                                                                                                                                                  | 17 | 17 |
| 301 | Neu5Aca2-6Galb1-4GlcNAcb1-2Mana1-6(Galb1-4GlcNAcb1-2Mana1-3)Manb1-4GlcNAcb1-4GlcNAcb-Sp12                                                                                                                  | 17 | 8  |
| 427 | Gala1-3(Fuca1-2)Galb1-4GlcNAcb1-2Mana1-6(Gala1-3(Fuca1-2)Galb1-4GlcNAcb1-2Mana1-3)Manb1-4GlcNAcb1-4(Fuca1-6)GlcNAcb-Sp22                                                                                   | 17 | 15 |
| 133 | GlcNAcb1-6(Galb1-3)GalNAca-Sp8                                                                                                                                                                             | 17 | 8  |
| 338 | GlcNAca1-4Galb1-4GlcNAcb1-3Galb1-4GlcNAcb1-3Galb1-4GlcNAcb-Sp0                                                                                                                                             | 17 | 5  |
| 220 | Fuca1-2(6S)Galb1-4GlcNAcb-Sp0                                                                                                                                                                              | 16 | 13 |
| 151 | Galb1-4(Fuca1-3)GlcNAcb-Sp0                                                                                                                                                                                | 16 | 11 |
| 575 | Galb1-4GlcNAcb1-3Galb1-4GlcNAcb1-2Mana1-6(Galb1-4GlcNAcb1-3Galb1-4GlcNAcb1-2Mana1-3)Manb1-4GlcNAcb1-4(Fuca1-6)GlcNAcb-Sp24                                                                                 | 16 | 9  |
| 8   | Rhaa-Sp8                                                                                                                                                                                                   | 16 | 3  |
| 114 | Gala1-3Galb1-3GlcNAcb-Sp0                                                                                                                                                                                  | 16 | 1  |
| 202 | GlcAb-Sp8                                                                                                                                                                                                  | 16 | 14 |
| 475 | GlcNAcb1-6(GlcNAcb1-2)Mana1-6(GlcNAcb1-2Mana1-3)Manb1-4GlcNAcb1-4(Fuca1-6)GlcNAcb-Sp24                                                                                                                     | 16 | 5  |
| 152 | Galb1-4(Fuca1-3)GlcNAcb-Sp8                                                                                                                                                                                | 16 | 18 |
| 23  | 6S(3S)Galb1-4GlcNAcb-Sp0                                                                                                                                                                                   | 16 | 6  |
| 324 | Galb1-3GlcNAcb1-2Mana1-6(Galb1-3GlcNAcb1-2Mana1-3)Manb1-4GlcNAcb1-4GlcNAcb-Sp19                                                                                                                            | 16 | 5  |

|     |                                                                                                                                                                               |    |    |
|-----|-------------------------------------------------------------------------------------------------------------------------------------------------------------------------------|----|----|
| 341 | GlcNAc1-4Galb1-4GlcNAcb1-3Galb1-4Glc-Sp0                                                                                                                                      | 16 | 15 |
| 47  | (6S)GlcNAcb-Sp8                                                                                                                                                               | 16 | 6  |
| 507 | GlcNAcb1-6(GlcNAcb1-2)Mana1-6(GlcNAcb1-4)(GlcNAcb1-4)(GlcNAcb1-2)Mana1-3)Manb1-4GlcNAcb1-4(Fuca1-6)GlcNAc-Sp21                                                                | 16 | 6  |
| 159 | Galb1-4GlcNAcb1-3GalNAca-Sp8                                                                                                                                                  | 16 | 8  |
| 293 | Galb1-4GlcNAcb1-3Galb1-3GlcNAcb-Sp0                                                                                                                                           | 16 | 7  |
| 493 | Galb1-4(Fuca1-3)GlcNAcb1-6(Neu5Aca2-6(Neu5Aca2-3Galb1-3)GlcNAcb1-3)Galb1-4Glc-Sp21                                                                                            | 16 | 6  |
| 607 | Neu5Aca2-3Galb1-4GlcNAcb1-3Galb1-4GlcNAcb1-3Galb1-4GlcNAcb1-2Mana1-6(Neu5Aca2-3Galb1-4GlcNAcb1-3Galb1-4GlcNAcb1-2Mana1-3)Manb1-4GlcNAcb1-4GlcNAcb-Sp12                        | 16 | 6  |
| 522 | Gala1-3(Fuca1-2)Galb1-4GlcNAcb1-2Mana-Sp0                                                                                                                                     | 16 | 14 |
| 530 | GlcNAcb1-2 Mana1-6(GlcNAcb1-4)(GlcNAcb1-2Mana1-3)Manb1-4GlcNAcb1-4(Fuca1-6)GlcNAc-Sp21                                                                                        | 16 | 10 |
| 337 | Neu5Aca2-3Galb1-4(Fuca1-3)GlcNAcb1-6(Neu5Aca2-3Galb1-3)GalNAc-Sp14                                                                                                            | 16 | 6  |
| 413 | Gala1-3(Fuca1-2)Galb1-4GlcNAcb1-3GalNAca-Sp14                                                                                                                                 | 16 | 8  |
| 209 | Mana1-2Mana1-3Mana-Sp9                                                                                                                                                        | 15 | 6  |
| 173 | GlcNAca1-3Galb1-4GlcNAcb-Sp8                                                                                                                                                  | 15 | 4  |
| 412 | Neu5Aca2-3Galb1-3GalNAcb1-4(Neu5Aca2-8Neu5Aca2-3)Galb1-4Glc-Sp0                                                                                                               | 15 | 7  |
| 26  | (3S)Galb1-4(6S)Glc-Sp0                                                                                                                                                        | 15 | 15 |
| 382 | Galb1-3GlcNAcb1-3Galb1-4GlcNAcb1-6(Galb1-3GlcNAcb1-3)Galb1-4Glc-Sp0                                                                                                           | 15 | 6  |
| 22  | 6S(3S)Galb1-4(6S)GlcNAcb-Sp0                                                                                                                                                  | 15 | 9  |
| 300 | Galb1-3Galb1-4GlcNAcb-Sp8                                                                                                                                                     | 15 | 7  |
| 437 | Galb1-4GlcNAcb1-6(Galb1-4GlcNAcb1-2)Mana1-6(GlcNAcb1-4)(Galb1-4GlcNAcb1-2Mana1-3)Manb1-4GlcNAcb1-4GlcNAc-Sp21                                                                 | 15 | 5  |
| 401 | Galb1-4(Fuca1-3)GlcNAcb1-3GalNAca-Sp14                                                                                                                                        | 15 | 2  |
| 51  | Mana1-6(Mana1-3)Manb1-4GlcNAcb1-4GlcNAcb-Sp13                                                                                                                                 | 15 | 5  |
| 165 | Galb1-4GlcNAcb1-3Galb1-4Glc-Sp8                                                                                                                                               | 15 | 7  |
| 1   | Gala-Sp8                                                                                                                                                                      | 15 | 4  |
| 347 | Neu5Aca2-6Galb1-4GlcNAcb1-2Mana1-6Manb1-4GlcNAcb1-4GlcNAc-Sp12                                                                                                                | 15 | 15 |
| 361 | Fuca1-2Galb1-4GlcNAcb1-2Mana1-6(Fuca1-2Galb1-4GlcNAcb1-2Mana1-3)Manb1-4GlcNAcb1-4GlcNAcb-Sp20                                                                                 | 15 | 14 |
| 20  | Galb1-4GlcNAcb1-6(Galb1-4GlcNAcb1-3)GalNAc-Sp14                                                                                                                               | 15 | 10 |
| 279 | Neu5Acb2-6Galb1-4GlcNAcb-Sp8                                                                                                                                                  | 15 | 13 |
| 156 | Galb1-4(6S)Glc-Sp8                                                                                                                                                            | 15 | 8  |
| 391 | Galb1-3GlcNAcb1-3GalNAca-Sp14                                                                                                                                                 | 15 | 19 |
| 74  | Fuca1-2Galb1-4GlcNAcb1-3Galb1-4GlcNAcb1-3Galb1-4GlcNAcb-Sp0                                                                                                                   | 15 | 11 |
| 429 | Galb1-4GlcNAcb1-6(Fuca1-2Galb1-3GlcNAcb1-3)Galb1-4Glc-Sp21                                                                                                                    | 15 | 5  |
| 450 | Gala1-3(Fuca1-2)Galb1-4GlcNAcb1-6(Gala1-3(Fuca1-2)Galb1-4GlcNAcb1-3)GalNAc-Sp14                                                                                               | 15 | 5  |
| 11  | Neu5Acb-Sp8                                                                                                                                                                   | 15 | 4  |
| 101 | Gala1-3(Fuca1-2)Galb1-3GlcNAcb-Sp0                                                                                                                                            | 15 | 3  |
| 138 | Neu5Aca2-6(Galb1-3)GlcNAcb1-4Galb1-4Glc-Sp10                                                                                                                                  | 15 | 6  |
| 76  | Fuca1-2Galb1-4GlcNAcb-Sp8                                                                                                                                                     | 15 | 8  |
| 558 | GlcNAcb1-3Galb1-4GlcNAcb1-6(GlcNAcb1-3Galb1-4GlcNAcb1-2)Mana1-6(GlcNAcb1-3Galb1-4GlcNAcb1-2Man a1-3)Manb1-4GlcNAcb1-4GlcNAc-Sp24                                              | 15 | 16 |
| 115 | Gala1-3Galb1-4GlcNAcb-Sp8                                                                                                                                                     | 15 | 4  |
| 177 | GlcNAcb1-6(GlcNAcb1-3)GalNAca-Sp14                                                                                                                                            | 15 | 3  |
| 181 | GlcNAcb1-3Galb-Sp8                                                                                                                                                            | 15 | 5  |
| 608 | Neu5Aca2-6Galb1-4GlcNAcb1-3Galb1-4GlcNAcb1-2Mana1-6(Neu5Aca2-6Galb1-4GlcNAcb1-3Galb1-4GlcNAcb1-2Mana1-3)Manb1-4GlcNAcb1-4GlcNAcb-Sp12                                         | 15 | 11 |
| 227 | Neu5Aca2-8Neu5Aca2-8Neu5Aca2-3Galb1-4Glc-Sp0                                                                                                                                  | 14 | 9  |
| 368 | Galb1-4(Fuca1-3)GlcNAcb1-6(Fuca1-2Galb1-4GlcNAcb1-3)Galb1-4Glc-Sp21                                                                                                           | 14 | 5  |
| 120 | Gala1-4Galb1-4GlcNAcb-Sp0                                                                                                                                                     | 14 | 7  |
| 518 | (6P)Galb1-4GlcNAcb-Sp0                                                                                                                                                        | 14 | 7  |
| 118 | Gala1-3Galb-Sp8                                                                                                                                                               | 14 | 4  |
| 149 | Galb1-3GlcNAcb-Sp0                                                                                                                                                            | 14 | 14 |
| 579 | Galb1-4GlcNAcb1-3Galb1-4GlcNAcb1-3Galb1-4GlcNAcb1-2Mana1-6(Galb1-4GlcNAcb1-3Galb1-4GlcNAcb1-3Galb1-4GlcNAcb1-3Galb1-4GlcNAcb1-2Mana1-3)Manb1-4GlcNAcb1-4(Fuca1-6)GlcNAcb-Sp24 | 14 | 8  |



|     |                                                                                                                 |    |    |
|-----|-----------------------------------------------------------------------------------------------------------------|----|----|
| 121 | Gala1-4Galb1-4GlcNAcb-Sp8                                                                                       | 13 | 3  |
| 592 | Neu5Aca2-3Galb1-4GlcNAcb1-3Galb1-4GlcNAcb1-3GalNAca-Sp14                                                        | 13 | 6  |
| 142 | Galb1-3GalNAcb-Sp8                                                                                              | 13 | 4  |
| 327 | Galb1-4(Fuca1-3)GlcNAcb1-2Mana1-6(Galb1-4(Fuca1-3)GlcNAcb1-2Mana1-3)Manb1-4GlcNAcb1-4GlcNAcb-Sp20               | 13 | 3  |
| 60  | Fuca1-2Galb1-3(Fuca1-4)GlcNAcb-Sp8                                                                              | 13 | 6  |
| 174 | GlcNAca1-6Galb1-4GlcNAcb-Sp8                                                                                    | 12 | 8  |
| 560 | Gala1-3Galb1-4GlcNAcb1-2Mana1-6(Gala1-3Galb1-4GlcNAcb1-2Mana1-3)Manb1-4GlcNAcb1-4GlcNAcb-Sp24                   | 12 | 7  |
| 41  | (6P)Mana-Sp8                                                                                                    | 12 | 10 |
| 224 | Neu5Aca2-3Galb1-3GalNAca-Sp14                                                                                   | 12 | 7  |
| 610 | Galb1-3GalNAcb1-4(Neu5Aca2-8Neu5Aca2-8Neu5Aca2-3)Galb1-4Glc-Sp21                                                | 12 | 6  |
| 452 | Neu5Aca2-8Neu5Aca2-3Galb1-3GalNAcb1-4(Neu5Aca2-8Neu5Aca2-3)Galb1-4Glc-Sp0                                       | 12 | 7  |
| 349 | Galb1-4GlcNAcb1-2Mana1-3Manb1-4GlcNAcb1-4GlcNAcb-Sp12                                                           | 12 | 8  |
| 400 | Fuca1-2Galb1-4GlcNAcb1-3GalNAca-Sp14                                                                            | 12 | 4  |
| 106 | Gala1-3(Fuca1-2)Galb1-4Glc-Sp0                                                                                  | 12 | 13 |
| 477 | Neu5Aca2-6Galb1-4GlcNAcb1-6(Galb1-3GlcNAcb1-3)Galb1-4Glc-Sp21                                                   | 12 | 16 |
| 505 | Fuca1-2Galb1-3GlcNAcb1-6(Fuca1-2Galb1-3GlcNAcb1-3)GalNAca-Sp14                                                  | 12 | 8  |
| 45  | (6S)Galb1-4(6S)Glc-Sp8                                                                                          | 12 | 6  |
| 167 | Galb1-4GlcNAcb1-6(Galb1-3)GalNAcb-Sp14                                                                          | 12 | 3  |
| 318 | Neu5Aca2-6Galb1-4GlcNAcb1-2Mana1-6(Neu5Aca2-3Galb1-4GlcNAcb1-2Mana1-3)Manb1-4GlcNAcb1-4GlcNAcb-Sp12             | 12 | 5  |
| 435 | Galb1-4GlcNAcb1-2Mana1-6(GlcNAcb1-4)(Galb1-4GlcNAcb1-2Mana1-3)Manb1-4GlcNAcb1-4GlcNAcb-Sp21                     | 12 | 4  |
| 217 | Manb1-4GlcNAcb-Sp0                                                                                              | 12 | 8  |
| 369 | Galb1-4GlcNAcb1-2Mana1-6(Galb1-4GlcNAcb1-4)(Galb1-4GlcNAcb1-2)Mana1-3)Manb1-4GlcNAcb1-4GlcNAcb-Sp21             | 12 | 6  |
| 197 | Glca1-6Glca1-6Glc-Sp8                                                                                           | 12 | 5  |
| 58  | Fuca1-2Galb1-3GalNAcb1-3Gala-Sp9                                                                                | 12 | 8  |
| 467 | Gala1-3(Fuca1-2)Galb1-3GalNAca-Sp8                                                                              | 12 | 6  |
| 44  | (6S)Galb1-4GlcNAcb-Sp8                                                                                          | 12 | 8  |
| 496 | Galb1-4(Fuca1-3)GlcNAcb1-2Mana-Sp0                                                                              | 12 | 10 |
| 61  | Fuca1-2Galb1-3GalNAca-Sp8                                                                                       | 12 | 6  |
| 196 | Glca1-4Glca-Sp8                                                                                                 | 12 | 15 |
| 416 | Fuca1-2Galb1-4(Fuca1-3)GlcNAcb1-3GalNAca-Sp14                                                                   | 12 | 9  |
| 567 | Galb1-3GlcNAcb1-6(Galb1-3)GalNAcb-Sp14                                                                          | 12 | 8  |
| 124 | Gala1-6Glc-Sp8                                                                                                  | 11 | 11 |
| 389 | Fuca1-2Galb1-3GalNAca1-3(Fuca1-2)Galb1-4Glc-Sp0                                                                 | 11 | 9  |
| 453 | GalNAcb1-4Galb1-4Glc-Sp0                                                                                        | 11 | 7  |
| 246 | Neu5Aca2-3Galb1-3GalNAcb1-3Gala1-4Galb1-4Glc-Sp0                                                                | 11 | 10 |
| 57  | Neu5Aca2-6Galb1-4GlcNAcb1-2Mana1-6(Neu5Aca2-6Galb1-4GlcNAcb1-2Mana1-3)Manb1-4GlcNAcb1-4GlcNAcb-Sp24             | 11 | 6  |
| 358 | KDNa2-3Galb1-4Glc-Sp0                                                                                           | 11 | 12 |
| 180 | GlcNAcb1-3GalNAca-Sp14                                                                                          | 11 | 10 |
| 330 | Neu5Aca2-6Galb1-4GlcNAcb1-3Galb1-3GlcNAcb-Sp0                                                                   | 11 | 3  |
| 243 | Neu5Aca2-6(Neu5Aca2-3Galb1-3)GalNAca-Sp8                                                                        | 11 | 7  |
| 35  | (3S)Galb1-4(6S)GlcNAcb-Sp8                                                                                      | 11 | 8  |
| 449 | Fuca1-2Galb1-4GlcNAcb1-6(Fuca1-2Galb1-4GlcNAcb1-3)GalNAcb-Sp14                                                  | 11 | 4  |
| 459 | Neu5Aca2-3Galb1-4GlcNAcb1-2Mana1-6(GlcNAcb1-4)(Neu5Aca2-3Galb1-4GlcNAcb1-2Mana1-3)Manb1-4GlcNAcb1-4GlcNAcb-Sp21 | 11 | 3  |
| 40  | (4S)Galb1-4GlcNAcb-Sp8                                                                                          | 11 | 5  |
| 436 | Galb1-4GlcNAcb1-2Mana1-6(GlcNAcb1-4)(Galb1-4GlcNAcb1-4)(Galb1-4GlcNAcb1-2)Mana1-3)Manb1-4GlcNAcb1-4GlcNAcb-Sp21 | 11 | 7  |
| 602 | Neu5Aca2-6Galb1-4GlcNAcb1-6(Galb1-3)GalNAca-Sp14                                                                | 11 | 10 |
| 178 | GlcNAcb1-6(GlcNAcb1-3)Galb1-4GlcNAcb-Sp8                                                                        | 11 | 12 |
| 260 | Neu5Aca2-3Galb1-4GlcNAcb-Sp8                                                                                    | 11 | 3  |
| 442 | GalNAcb1-6GalNAcb-Sp8                                                                                           | 10 | 7  |

|     |                                                                                                                                               |    |    |
|-----|-----------------------------------------------------------------------------------------------------------------------------------------------|----|----|
| 372 | Gala1-3Galb1-4(Fuca1-3)GlcNAcb1-2Mana1-6(Gala1-3Galb1-4(Fuca1-3)GlcNAcb1-2Mana1-3)Manb1-4GlcNAcb1-4GlcNAcb-Sp20                               | 10 | 7  |
| 535 | GlcNAcb1-3Galb1-4GlcNAcb1-6(GlcNAcb1-3)Galb1-4GlcNAc-Sp0                                                                                      | 10 | 0  |
| 136 | Neu5Aca2-6(Galb1-3)GalNAca-Sp14                                                                                                               | 10 | 2  |
| 107 | Gala1-3(Fuca1-2)Galb-Sp8                                                                                                                      | 10 | 10 |
| 283 | Neu5Gca2-3Galb1-4GlcNAcb-Sp0                                                                                                                  | 10 | 9  |
| 460 | Neu5Aca2-3Galb1-4GlcNAcb1-4Mana1-6(GlcNAcb1-4)(Neu5Aca2-3Galb1-4GlcNAcb1-4)(Neu5Aca2-3Galb1-4GlcNAcb1-2)Mana1-3)Manb1-4GlcNAcb1-4GlcNAcb-Sp21 | 10 | 10 |
| 190 | GlcNAcb1-4GlcNAcb1-4GlcNAcb1-4GlcNAcb1-4GlcNAcb1-Sp8                                                                                          | 10 | 8  |
| 499 | Fuca1-2Galb1-4GlcNAcb1-2Mana-Sp0                                                                                                              | 10 | 5  |
| 127 | Galb1-3GlcNAcb1-3Galb1-4(Fuca1-3)GlcNAcb-Sp0                                                                                                  | 10 | 7  |
| 394 | Gala1-3Galb1-3GlcNAcb1-2Mana1-6(Gala1-3Galb1-3GlcNAcb1-2Mana1-3)Manb1-4GlcNAcb1-4GlcNAc-Sp19                                                  | 10 | 3  |
| 276 | Neu5Aca2-8Neu5Aca2-3Galb1-4Glc-Sp0                                                                                                            | 10 | 7  |
| 321 | Neu5Aca2-8Neu5Acb-Sp17                                                                                                                        | 10 | 5  |
| 325 | Neu5Aca2-3Galb1-4GlcNAcb1-2Mana1-6(Neu5Aca2-3Galb1-4GlcNAcb1-2Mana1-3)Manb1-4GlcNAcb1-4GlcNAcb-Sp12                                           | 10 | 8  |
| 371 | Gala1-3(Fuca1-2)Galb1-4GlcNAcb1-2Mana1-6(Gala1-3(Fuca1-2)Galb1-4GlcNAcb1-2Mana1-3)Manb1-4GlcNAcb1-4GlcNAcb-Sp20                               | 10 | 3  |
| 288 | Neu5Aca2-3Galb1-4GlcNAcb1-6(Galb1-3)GalNAca-Sp14                                                                                              | 10 | 6  |
| 212 | Mana1-2Mana1-6(Mana1-2Mana1-3)Mana1-6(Mana1-2Mana1-2Mana1-3)Manb1-4GlcNAcb1-4GlcNAcb-Sp12                                                     | 10 | 6  |
| 458 | Galb1-4GlcNAcb1-6(Galb1-4GlcNAcb1-2)Mana1-6(Galb1-4GlcNAcb1-2Mana1-3)Manb1-4GlcNAcb1-4GlcNAcb-Sp19                                            | 10 | 5  |
| 544 | Fuca1-2Galb1-4GlcNAcb1-3Galb1-4GlcNAcb1-2Mana1-6(Fuca1-2Galb1-4GlcNAcb1-3Galb1-4GlcNAcb1-2Mana1-3)Manb1-4GlcNAcb1-4GlcNAcb-Sp24               | 10 | 6  |
| 407 | Galb1-3GlcNAca1-6Galb1-4GlcNAcb-Sp0                                                                                                           | 10 | 9  |
| 179 | GlcNAcb1-3GalNAca-Sp8                                                                                                                         | 10 | 7  |
| 216 | Mana1-6(Mana1-3)Mana1-6(Mana1-3)Manb1-4GlcNAcb1-4GlcNAcb-Sp12                                                                                 | 10 | 11 |
| 171 | Galb1-4Glc-Sp0                                                                                                                                | 10 | 8  |
| 184 | GlcNAcb1-3Galb1-4GlcNAcb1-3Galb1-4GlcNAcb-Sp0                                                                                                 | 10 | 8  |
| 208 | Mana1-2Mana1-6(Mana1-2Mana1-3)Mana-Sp9                                                                                                        | 10 | 3  |
| 18  | GlcN(Gc)b-Sp8                                                                                                                                 | 10 | 14 |
| 504 | (3S)GalNAcb1-4(Fuca1-3)GlcNAcb-Sp8                                                                                                            | 10 | 7  |
| 164 | Galb1-4GlcNAcb1-3Galb1-4Glc-Sp0                                                                                                               | 10 | 3  |
| 100 | Gala1-2Galb-Sp8                                                                                                                               | 10 | 4  |
| 317 | Neu5Aca2-3Galb1-4GlcNAcb1-6(Neu5Aca2-3Galb1-3)GalNAca-Sp14                                                                                    | 10 | 11 |
| 10  | Neu5Aca-Sp11                                                                                                                                  | 9  | 4  |
| 270 | Neu5Aca2-6Galb1-4GlcNAcb1-3Galb1-4(Fuca1-3)GlcNAcb1-3Galb1-4(Fuca1-3)GlcNAcb-Sp0                                                              | 9  | 3  |
| 238 | Neu5Aca2-3Galb1-3(6S)GlcNAc-Sp8                                                                                                               | 9  | 7  |
| 344 | GlcNAca1-4Galb1-3GalNAc-Sp14                                                                                                                  | 9  | 8  |
| 258 | Neu5Aca2-3Galb1-4GlcNAcb1-3Galb1-4GlcNAcb-Sp0                                                                                                 | 9  | 2  |
| 322 | Neu5Aca2-8Neu5Aca2-8Neu5Acb-Sp8                                                                                                               | 9  | 6  |
| 309 | GlcNAcb1-3Man-Sp10                                                                                                                            | 9  | 12 |
| 297 | (6S)Galb1-4(6S)GlcNAcb-Sp0                                                                                                                    | 9  | 4  |
| 249 | Neu5Aca2-3Galb1-3GlcNAcb-Sp0                                                                                                                  | 9  | 5  |
| 73  | Fuca1-2Galb1-4GlcNAcb1-3Galb1-4GlcNAcb-Sp0                                                                                                    | 9  | 7  |
| 194 | GlcNAcb1-6Galb1-4GlcNAcb-Sp8                                                                                                                  | 9  | 9  |
| 432 | GlcNAcb1-2Mana1-6(GlcNAcb1-4)(GlcNAcb1-4)(GlcNAcb1-2)Mana1-3)Manb1-4GlcNAcb1-4GlcNAc-Sp21                                                     | 9  | 7  |
| 140 | Galb1-3GalNAca-Sp14                                                                                                                           | 9  | 11 |
| 211 | Mana1-2Mana1-6(Mana1-3)Mana1-6(Mana1-2Mana1-2Mana1-3)Manb1-4GlcNAcb1-4GlcNAcb-Sp12                                                            | 9  | 21 |
| 352 | GlcNAcb1-2Mana1-6(GlcNAcb1-2Mana1-3)Manb1-4GlcNAcb1-4(Fuca1-6)GlcNAcb-Sp22                                                                    | 9  | 7  |
| 207 | Mana1-2Mana1-2Mana1-3Mana-Sp9                                                                                                                 | 9  | 8  |
| 357 | KDNa2-6Galb1-4GlcNAc-Sp0                                                                                                                      | 9  | 10 |
| 34  | (3S)Galb1-4(6S)GlcNAcb-Sp0                                                                                                                    | 9  | 10 |
| 37  | (3S)Galb1-4GlcNAcb-Sp8                                                                                                                        | 9  | 7  |
| 126 | Galb1-3(Fuca1-4)GlcNAcb1-3Galb1-4(Fuca1-3)GlcNAcb-Sp0                                                                                         | 9  | 2  |

|     |                                                                                                                          |   |    |
|-----|--------------------------------------------------------------------------------------------------------------------------|---|----|
| 363 | Gala1-3Galb1-4GlcNAcb1-2Mana1-6(Gala1-3Galb1-4GlcNAcb1-2Mana1-3)Manb1-4GlcNAcb1-4GlcNAcb-Sp20                            | 9 | 3  |
| 237 | Neu5Aca2-3GalNAcb1-4GlcNAcb-Sp0                                                                                          | 9 | 6  |
| 201 | GlcAa-Sp8                                                                                                                | 9 | 5  |
| 405 | Gala1-3Galb1-4GlcNAcb1-3GalNAca-Sp14                                                                                     | 9 | 4  |
| 600 | Neu5Aca2-3Galb1-4GlcNAcb1-3Galb1-4GlcNAcb1-6(Galb1-3)GalNAca-Sp14                                                        | 9 | 9  |
| 409 | Gala1-3(Fuca1-2)Galb1-4(Fuca1-3)Glc-Sp21                                                                                 | 9 | 6  |
| 443 | (6S)Galb1-3GlcNAcb-Sp0                                                                                                   | 9 | 11 |
| 557 | Neu5Aca2-8Neu5Aca2-3Galb1-4GlcNAc-Sp0                                                                                    | 9 | 4  |
| 350 | Galb1-4GlcNAcb1-2Mana1-6Manb1-4GlcNAcb1-4GlcNAc-Sp12                                                                     | 9 | 13 |
| 30  | (3S)Galb1-3GlcNAcb-Sp0                                                                                                   | 9 | 11 |
| 119 | Gala1-4(Fuca1-2)Galb1-4GlcNAcb-Sp8                                                                                       | 8 | 6  |
| 72  | Fuca1-2Galb1-4(Fuca1-3)GlcNAcb-Sp8                                                                                       | 8 | 3  |
| 188 | GlcNAcb1-4Galb1-4GlcNAcb-Sp8                                                                                             | 8 | 11 |
| 555 | Neu5Gca2-8Neu5Gca2-3Galb1-4GlcNAcb1-3Galb1-4GlcNAc-Sp0                                                                   | 8 | 5  |
| 33  | (3S)Galb1-4(Fuca1-3)GlcNAc-Sp8                                                                                           | 8 | 7  |
| 251 | Neu5Aca2-3Galb1-4(6S)GlcNAcb-Sp8                                                                                         | 8 | 5  |
| 6   | Fuca-Sp8                                                                                                                 | 8 | 5  |
| 296 | 4S(3S)Galb1-4GlcNAcb-Sp0                                                                                                 | 8 | 8  |
| 163 | Galb1-4GlcNAcb1-3Galb1-4GlcNAcb-Sp0                                                                                      | 8 | 4  |
| 286 | Neu5Gca2-6Galb1-4GlcNAcb-Sp0                                                                                             | 8 | 4  |
| 497 | Fuca1-2(6S)Galb1-3GlcNAcb-Sp0                                                                                            | 8 | 3  |
| 122 | Gala1-4Galb1-4Glc-Sp0                                                                                                    | 8 | 12 |
| 456 | Neu5Aca2-6Galb1-4GlcNAcb1-6(Fuca1-2Galb1-3GlcNAcb1-3)Galb1-4Glc-Sp21                                                     | 8 | 5  |
| 433 | GlcNAcb1-6(GlcNAcb1-2)Mana1-6(GlcNAcb1-4)(GlcNAcb1-2Mana1-3)Manb1-4GlcNAcb1-4GlcNAc-Sp21                                 | 8 | 5  |
| 289 | Galb1-3GlcNAcb1-3Galb1-3GlcNAcb-Sp0                                                                                      | 8 | 3  |
| 277 | Galb1-3(Fuca1-4)GlcNAcb1-3Galb1-3(Fuca1-4)GlcNAcb-Sp0                                                                    | 8 | 7  |
| 305 | Galb1-4GlcNAcb1-6Galb1-4GlcNAcb-Sp0                                                                                      | 8 | 6  |
| 242 | Neu5Aca2-3Galb1-3(6S)GalNAca-Sp8                                                                                         | 8 | 6  |
| 423 | Gala1-3(Fuca1-2)Galb1-3GlcNAcb1-3GalNAc-Sp14                                                                             | 8 | 3  |
| 422 | Fuca1-2Galb1-3GlcNAcb1-3GalNAc-Sp14                                                                                      | 8 | 2  |
| 480 | Neu5Aca2-6Galb1-4GlcNAcb1-6GalNAca-Sp14                                                                                  | 8 | 11 |
| 281 | Neu5Gca2-3Galb1-3GlcNAcb-Sp0                                                                                             | 8 | 3  |
| 36  | (3S)Galb1-4GlcNAcb-Sp0                                                                                                   | 8 | 9  |
| 470 | Glca1-4Glca1-4Glca1-4Glc-Sp10                                                                                            | 8 | 1  |
| 404 | Gala1-4Galb1-4GlcNAcb1-2Mana1-6(Gala1-4Galb1-4GlcNAcb1-2Mana1-3)Manb1-4GlcNAcb1-4GlcNAcb-Sp24                            | 8 | 5  |
| 200 | G-ol-Sp8                                                                                                                 | 8 | 6  |
| 154 | Galb1-4(Fuca1-3)GlcNAcb1-3Galb1-4(Fuca1-3)GlcNAcb1-3Galb1-4(Fuca1-3)GlcNAcb-Sp0                                          | 8 | 9  |
| 160 | Galb1-4GlcNAcb1-3GalNAc-Sp14                                                                                             | 8 | 6  |
| 284 | Neu5Gca2-3Galb1-4Glc-Sp0                                                                                                 | 8 | 5  |
| 498 | Gala1-3(Fuca1-2)Galb1-4GlcNAcb1-6GalNAca-Sp14                                                                            | 8 | 10 |
| 531 | Galb1-4GlcNAcb1-2 Mana1-6(GlcNAcb1-4)(Galb1-4GlcNAcb1-2Mana1-3)Manb1-4GlcNAcb1-4(Fuca1-6)GlcNAc-Sp21                     | 8 | 15 |
| 455 | Gala1-3(Fuca1-2)Galb1-3GlcNAcb1-2Mana1-6(Gala1-3(Fuca1-2)Galb1-3GlcNAcb1-2Mana1-3)Manb1-4GlcNAcb1-4(Fuca1-6)GlcNAcb-Sp22 | 7 | 6  |
| 157 | Galb1-4GalNAca1-3(Fuca1-2)Galb1-4GlcNAcb-Sp8                                                                             | 7 | 7  |
| 395 | Gala1-3Galb1-3(Fuca1-4)GlcNAcb1-2Mana1-6(Gala1-3Galb1-3(Fuca1-4)GlcNAcb1-2Mana1-3)Manb1-4GlcNAcb1-4GlcNAc-Sp19           | 7 | 2  |
| 316 | Mana1-2Mana1-6(Mana1-2Mana1-3)Mana1-6(Mana1-2Mana1-2Mana1-3)Mana-Sp9                                                     | 7 | 7  |
| 417 | Gala1-3(Fuca1-2)Galb1-4(Fuca1-3)GlcNAcb1-3GalNAc-Sp14                                                                    | 7 | 6  |
| 139 | Galb1-3GalNAca-Sp8                                                                                                       | 7 | 9  |
| 486 | Neu5Aca2-3Galb1-3GlcNAcb1-2Mana1-6(GlcNAcb1-4)(Neu5Aca2-3Galb1-3GlcNAcb1-2Mana1-3)Manb1-4GlcNAcb1-4GlcNAc-Sp21           | 7 | 7  |
| 366 | Neu5Aca2-6GlcNAcb1-4GlcNAc-Sp21                                                                                          | 7 | 7  |

|     |                                                                                                                                       |   |    |
|-----|---------------------------------------------------------------------------------------------------------------------------------------|---|----|
| 32  | (3S)Galb1-4(Fuca1-3)GlcNAc-Sp0                                                                                                        | 7 | 8  |
| 418 | GalNAca1-3(Fuca1-2)Galb1-4(Fuca1-3)GlcNAcb1-3GalNAc-Sp14                                                                              | 7 | 8  |
| 275 | Neu5Aca2-8Neu5Aca-Sp8                                                                                                                 | 7 | 7  |
| 380 | Galb1-3GalNAca1-3(Fuca1-2)Galb1-4Glc-Sp0                                                                                              | 7 | 5  |
| 354 | Galb1-3GlcNAcb1-2Mana1-6(Galb1-3GlcNAcb1-2Mana1-3)Manb1-4GlcNAcb1-4(Fuca1-6)GlcNAcb-Sp22                                              | 7 | 2  |
| 80  | Fuca1-4GlcNAcb-Sp8                                                                                                                    | 7 | 4  |
| 410 | Galb1-4GlcNAcb1-6(Neu5Aca2-6Galb1-3GlcNAcb1-3)Galb1-4Glc-Sp21                                                                         | 7 | 5  |
| 603 | Neu5Aca2-3Galb1-4GlcNAcb1-3Galb1-4GlcNAcb1-2Mana1-6(Neu5Aca2-3Galb1-4GlcNAcb1-3Galb1-4GlcNAcb1-2Mana1-3)Manb1-4GlcNAcb1-4GlcNAcb-Sp12 | 7 | 12 |
| 280 | Neu5Gca2-3Galb1-3(Fuca1-4)GlcNAcb-Sp0                                                                                                 | 7 | 13 |
| 67  | Fuca1-2Galb1-3GlcNAcb-Sp0                                                                                                             | 7 | 11 |
| 307 | GlcAb1-3GlcNAcb-Sp8                                                                                                                   | 7 | 9  |
| 517 | Galb1-4(6P)GlcNAcb-Sp0                                                                                                                | 7 | 1  |
| 117 | Gala1-3Galb1-4Glc-Sp10                                                                                                                | 7 | 7  |
| 66  | Fuca1-2Galb1-3GlcNAcb1-3Galb1-4Glc-Sp10                                                                                               | 7 | 7  |
| 169 | Galb1-4GlcNAcb-Sp8                                                                                                                    | 7 | 4  |
| 469 | Glca1-6Glca1-6Glca1-6Glc-Sp10                                                                                                         | 7 | 2  |
| 65  | Fuca1-2Galb1-3GlcNAcb1-3Galb1-4Glc-Sp8                                                                                                | 6 | 2  |
| 269 | Neu5Aca2-6Galb1-4GlcNAcb-Sp8                                                                                                          | 6 | 9  |
| 189 | GlcNAcb1-4GlcNAcb1-4GlcNAcb1-4GlcNAcb1-4GlcNAcb1-4GlcNAcb1-Sp8                                                                        | 6 | 7  |
| 515 | (3S)GalNAcb1-4GlcNAc-Sp8                                                                                                              | 6 | 10 |
| 468 | Gala1-3(Fuca1-2)Galb1-3GalNAcb-Sp8                                                                                                    | 6 | 5  |
| 56  | Neu5Aca2-6Galb1-4GlcNAcb1-2Mana1-6(Neu5Aca2-6Galb1-4GlcNAcb1-2Man-a1-3)Manb1-4GlcNAcb1-4GlcNAcb-Sp21                                  | 6 | 5  |
| 510 | Galb1-3(6S)GlcNAcb-Sp8                                                                                                                | 6 | 6  |
| 147 | Galb1-3GlcNAcb1-3Galb1-4GlcNAcb-Sp0                                                                                                   | 6 | 17 |
| 430 | Fuca1-3GlcNAcb1-6(Galb1-4GlcNAcb1-3)Galb1-4Glc-Sp21                                                                                   | 6 | 7  |
| 185 | GlcNAcb1-3Galb1-4Glc-Sp0                                                                                                              | 6 | 3  |
| 102 | Gala1-3(Fuca1-2)Galb1-3GlcNAcb-Sp8                                                                                                    | 6 | 11 |
| 574 | GlcNAcb1-3Galb1-4GlcNAcb1-2Mana1-6(GlcNAcb1-3Galb1-4GlcNAcb1-2Mana1-3)Manb1-4GlcNAcb1-4(Fuca1-6)GlcNAcb-Sp24                          | 6 | 3  |
| 230 | Neu5Aca2-3(6S)Galb1-4(Fuca1-3)GlcNAcb-Sp8                                                                                             | 6 | 2  |
| 291 | Galb1-4(Fuca1-3)(6S)Glc-Sp0                                                                                                           | 6 | 10 |
| 259 | Neu5Aca2-3Galb1-4GlcNAcb-Sp0                                                                                                          | 6 | 4  |
| 214 | Mana1-2Mana1-2Mana1-6(Mana1-3)Mana-Sp9                                                                                                | 6 | 3  |
| 308 | Neu5Aca2-6Galb1-4GlcNAcb1-2Mana1-6(GlcNAcb1-2Mana1-3)Manb1-4GlcNAcb1-4GlcNAcb-Sp12                                                    | 6 | 3  |
| 511 | (6S)(4S)GalNAcb1-4GlcNAc-Sp8                                                                                                          | 5 | 2  |
| 386 | Galb1-3GlcNAcb1-3Galb1-4(Fuca1-3)GlcNAcb1-6(Galb1-3GlcNAcb1-3)Galb1-4Glc-Sp21                                                         | 5 | 3  |
| 359 | KDNa2-3Galb1-3GalNAca-Sp14                                                                                                            | 5 | 7  |
| 168 | Galb1-4GlcNAcb-Sp0                                                                                                                    | 5 | 3  |
| 267 | Neu5Aca2-6Galb1-4(6S)GlcNAcb-Sp8                                                                                                      | 5 | 13 |
| 172 | Galb1-4Glc-Sp8                                                                                                                        | 5 | 5  |
| 328 | Neu5,9Ac2a2-3Galb1-4GlcNAcb-Sp0                                                                                                       | 5 | 12 |
| 556 | Neu5Gca2-8Neu5Gca2-6Galb1-4GlcNAc-Sp0                                                                                                 | 5 | 5  |
| 75  | Fuca1-2Galb1-4GlcNAcb-Sp0                                                                                                             | 5 | 10 |
| 257 | Neu5Aca2-3Galb1-4(Fuca1-3)GlcNAcb1-3Galb1-4GlcNAcb-Sp8                                                                                | 5 | 5  |
| 70  | Fuca1-2Galb1-4(Fuca1-3)GlcNAcb1-3Galb1-4(Fuca1-3)GlcNAcb1-3Galb1-4(Fuca1-3)GlcNAcb-Sp0                                                | 5 | 7  |
| 59  | Fuca1-2Galb1-3GalNAcb1-3Gala1-4Galb1-4Glc-Sp9                                                                                         | 5 | 6  |
| 526 | Neu5Aca2-3Galb1-3GlcNAcb1-2Mana-Sp0                                                                                                   | 5 | 8  |
| 271 | Neu5Aca2-6Galb1-4GlcNAcb1-3Galb1-4GlcNAcb-Sp0                                                                                         | 5 | 10 |
| 376 | Neu5Aca2-3Galb1-4GlcNAcb1-3GalNAc-Sp14                                                                                                | 5 | 5  |
| 397 | GlcNAcb1-2Mana1-6(Galb1-4GlcNAcb1-2Mana1-3)Manb1-4GlcNAcb1-4GlcNAc-Sp12                                                               | 5 | 5  |



|     |                                                                                                                                              |   |    |
|-----|----------------------------------------------------------------------------------------------------------------------------------------------|---|----|
| 239 | Neu5Aca2-3Galb1-3(Fuca1-4)GlcNAcb-Sp8                                                                                                        | 5 | 1  |
| 218 | Neu5Aca2-3Galb1-4GlcNAcb1-3Galb1-4(Fuca1-3)GlcNAcb-Sp0                                                                                       | 5 | 6  |
| 170 | Galb1-4GlcNAcb-Sp23                                                                                                                          | 4 | 6  |
| 406 | Galb1-3GlcNAcb1-6Galb1-4GlcNAcb-Sp0                                                                                                          | 4 | 7  |
| 64  | Fuca1-2Galb1-3GalNAcb1-4(Neu5Aca2-3)Galb1-4Glc-Sp9                                                                                           | 4 | 6  |
| 457 | GalNAca1-3(Fuca1-2)Galb1-3GlcNAcb1-2Mana1-6(GalNAca1-3(Fuca1-2)Galb1-3GlcNAcb1-2Mana1-3)Manb1-4GlcNAcb1-4(Fuca1-6)GlcNAcb-Sp22               | 4 | 19 |
| 314 | Mana1-6(Mana1-3)Mana1-6(Mana1-3)Manb-Sp10                                                                                                    | 4 | 3  |
| 598 | GlcNAcb1-3Galb1-4GlcNAcb1-3Galb1-4GlcNAcb1-3GalNAca-Sp14                                                                                     | 4 | 1  |
| 465 | Neu5Aca2-6Galb1-4GlcNAcb1-6(Neu5Aca2-6Galb1-4GlcNAcb1-2)Mana1-6(GlcNAcb1-4)(Neu5Aca2-6Galb1-4GlcNAcb1-2Mana1-3)Manb1-4GlcNAcb1-4GlcNAcb-Sp21 | 4 | 8  |
| 128 | Galb1-3(Fuca1-4)GlcNAc-Sp0                                                                                                                   | 4 | 6  |
| 79  | Fuca1-3GlcNAcb-Sp8                                                                                                                           | 4 | 8  |
| 315 | Mana1-2Mana1-6(Mana1-3)Mana1-6(Mana1-2Mana1-2Mana1-3)Mana-Sp9                                                                                | 4 | 7  |
| 419 | Galb1-4(Fuca1-3)GlcNAcb1-2Mana1-6(Galb1-4(Fuca1-3)GlcNAcb1-2Mana1-3)Manb1-4GlcNAcb1-4(Fuca1-6)GlcNAcb-Sp22                                   | 4 | 3  |
| 434 | GlcNAcb1-6(GlcNAcb1-2)Mana1-6(GlcNAcb1-4)(GlcNAcb1-4(GlcNAcb1-2)Mana1-3)Manb1-4GlcNAcb1-4GlcNAc-Sp21                                         | 3 | 6  |
| 287 | Neu5Gca-Sp8                                                                                                                                  | 3 | 8  |
| 145 | Galb1-3GalNAcb1-4Galb1-4Glc-Sp8                                                                                                              | 3 | 15 |
| 403 | Gala1-4Galb1-3GlcNAcb1-2Mana1-6(Gala1-4Galb1-3GlcNAcb1-2Mana1-3)Manb1-4GlcNAcb1-4GlcNAcb-Sp19                                                | 3 | 4  |
| 203 | GlcAb1-3Galb-Sp8                                                                                                                             | 3 | 7  |
| 110 | Gala1-3GalNAca-Sp8                                                                                                                           | 3 | 8  |
| 262 | Fuca1-2Galb1-4(6S)Glc-Sp0                                                                                                                    | 3 | 6  |
| 360 | Fuca1-2Galb1-3GlcNAcb1-2Mana1-6(Fuca1-2Galb1-3GlcNAcb1-2Mana1-3)Manb1-4GlcNAcb1-4GlcNAcb-Sp20                                                | 3 | 5  |
| 390 | Fuca1-2Galb1-3GalNAca1-3(Fuca1-2)Galb1-4GlcNAcb-Sp0                                                                                          | 3 | 3  |
| 9   | Neu5Aca-Sp8                                                                                                                                  | 3 | 7  |
| 534 | Neu5Aca2-3Galb1-4(Fuca1-3)GlcNAcb1-2Mana-Sp0                                                                                                 | 3 | 2  |
| 272 | Neu5Aca2-6Galb1-4Glc-Sp0                                                                                                                     | 3 | 3  |
| 440 | Galb1-6Galb-Sp10                                                                                                                             | 3 | 4  |
| 561 | GlcNAcb1-3Galb1-4GlcNAcb1-6(GlcNAcb1-3Galb1-3)GalNAca-Sp14                                                                                   | 2 | 2  |
| 112 | Gala1-3GalNAcb-Sp8                                                                                                                           | 2 | 7  |
| 43  | (6S)Galb1-4Glc-Sp8                                                                                                                           | 2 | 5  |
| 50  | Mana1-6(Mana1-3)Manb1-4GlcNAcb1-4GlcNAcb-Sp12                                                                                                | 2 | 5  |
| 248 | Fuca1-2(6S)Galb1-4Glc-Sp0                                                                                                                    | 2 | 5  |
| 148 | Galb1-3GlcNAcb1-3Galb1-4Glc-Sp10                                                                                                             | 2 | 4  |
| 340 | GlcNAca1-4Galb1-3GlcNAcb-Sp0                                                                                                                 | 2 | 4  |
| 125 | Galb1-2Galb-Sp8                                                                                                                              | 2 | 10 |
| 186 | GlcNAcb1-4-MDPLys                                                                                                                            | 2 | 4  |
| 383 | Galb1-4(Fuca1-3)GlcNAcb1-6(Galb1-3GlcNAcb1-3)Galb1-4Glc-Sp21                                                                                 | 1 | 4  |
| 273 | Neu5Aca2-6Galb1-4Glc-Sp8                                                                                                                     | 1 | 4  |
| 14  | Manb-Sp8                                                                                                                                     | 1 | 5  |
| 573 | Neu5Aca2-8Neu5Aca2-3Galb1-3GalNAcb1-4(Neu5Aca2-3)Galb1-4Glc-Sp21                                                                             | 1 | 5  |
| 323 | Neu5Gcb2-6Galb1-4GlcNAc-Sp8                                                                                                                  | 1 | 9  |
| 312 | MurNAcb1-4GlcNAcb-Sp10                                                                                                                       | 1 | 7  |
| 431 | GlcNAcb1-2Mana1-6(GlcNAcb1-4)(GlcNAcb1-2Mana1-3)Manb1-4GlcNAcb1-4GlcNAc-Sp21                                                                 | 1 | 4  |
| 54  | Galb1-4GlcNAcb1-2Mana1-6(Galb1-4GlcNAcb1-2Mana1-3)Manb1-4GlcNAcb1-4GlcNAcb-Sp12                                                              | 1 | 19 |
| 355 | (6S)GlcNAcb1-3Galb1-4GlcNAcb-Sp0                                                                                                             | 1 | 1  |
| 245 | Neu5Aca2-3Galb-Sp8                                                                                                                           | 0 | 3  |
| 569 | (3S)GlcAb1-3Galb1-4GlcNAcb1-3Galb1-4Glc-Sp0                                                                                                  | 0 | 16 |
| 319 | Galb1-4GlcNAcb1-2Mana1-6(Neu5Aca2-6Galb1-4GlcNAcb1-2Mana1-3)Manb1-4GlcNAcb1-4GlcNAcb-Sp12                                                    | 0 | 4  |
| 294 | Neu5Aca2-3Galb1-3GlcNAcb1-3Galb1-3GlcNAcb-Sp0                                                                                                | 0 | 4  |
| 351 | Mana1-6(Galb1-4GlcNAcb1-2Mana1-3)Manb1-4GlcNAcb1-4GlcNAcb-Sp12                                                                               | 0 | 4  |

|     |                                                                                                                                                                           |       |     |
|-----|---------------------------------------------------------------------------------------------------------------------------------------------------------------------------|-------|-----|
| 134 | GlcNAcb1-6(Galb1-3)GalNAca-Sp14                                                                                                                                           | 0     | 6   |
| 333 | Gala1-4Galb1-4GlcNAcb1-3Galb1-4Glc-Sp0                                                                                                                                    | 0     | 8   |
| 17  | GlcNAcb-Sp8                                                                                                                                                               | -1    | 3   |
| 595 | GlcNAcb1-3Galb1-4GlcNAcb1-6(GlcNAcb1-3Galb1-4GlcNAcb1-3)GalNAca-Sp14                                                                                                      | -1    | 11  |
| 108 | Gala1-3(Fuca1-2)Galb-Sp18                                                                                                                                                 | -1    | 6   |
| 593 | GlcNAcb1-3Galb1-4GlcNAcb1-3GalNAca-Sp14                                                                                                                                   | -2    | 28  |
| 537 | Gala1-3(Fuca1-2)Galb1-3GalNAcb1-3Gala1-4Galb1-4Glc-Sp21                                                                                                                   | -3    | 3   |
| 204 | GlcAb1-6Galb-Sp8                                                                                                                                                          | -3    | 9   |
| 221 | Fuca1-2Galb1-4(6S)GlcNAcb-Sp8                                                                                                                                             | -3    | 4   |
| 601 | Neu5Aca2-6Galb1-4GlcNAcb1-3Galb1-4GlcNAcb1-6(Galb1-3)GalNAca-Sp14                                                                                                         | -3    | 5   |
| 532 | Galb1-4GlcNAcb1-2 Mana1-6(Galb1-4GlcNAcb1-4)(Galb1-4GlcNAcb1-2Mana1-3)Manb1-4GlcNAcb1-4(Fuca1-6)GlcNAc-Sp21                                                               | -4    | 3   |
| 594 | GlcNAcb1-3Galb1-4GlcNAcb1-6(Galb1-3)GalNAca-Sp14                                                                                                                          | -5    | 11  |
| 454 | GalNAca1-3(Fuca1-2)Galb1-4GlcNAcb1-2Mana1-6(GalNAca1-3(Fuca1-2)Galb1-4GlcNAcb1-2Mana1-3)Manb1-4GlcNAcb1-4(Fuca1-6)GlcNAcb-Sp22                                            | -6    | 60  |
| 388 | GlcNAcb1-2Mana1-6(GlcNAcb1-4(GlcNAcb1-2)Mana1-3)Manb1-4GlcNAcb1-4GlcNAc-Sp21                                                                                              | -7    | 3   |
| 428 | Galb1-3GlcNAcb1-6(Galb1-3GlcNAcb1-2)Mana1-6(Galb1-3GlcNAcb1-2Mana1-3)Manb1-4GlcNAcb1-4GlcNAcb-Sp19                                                                        | -9    | 10  |
| 439 | Galb1-4Galb-Sp10                                                                                                                                                          | -10   | 17  |
| 146 | Galb1-3Galb-Sp8                                                                                                                                                           | -10   | 8   |
| 19  | Galb1-4GlcNAcb1-6(Galb1-4GlcNAcb1-3)GalNAca-Sp8                                                                                                                           | -10   | 11  |
| 438 | Galb1-4GlcNAcb1-6(Galb1-4GlcNAcb1-2)Mana1-6(GlcNAcb1-4)(Galb1-4GlcNAcb1-4(Galb1-4GlcNAcb1-2)Mana1-3)Manb1-4GlcNAcb1-4GlcNAc-Sp21                                          | -14   | 15  |
| 599 | Galb1-4GlcNAcb1-3Galb1-3GalNAca-Sp14                                                                                                                                      | -14   | 18  |
| 604 | GlcNAcb1-6(Neu5Aca2-3Galb1-3)GalNAca-Sp14                                                                                                                                 | -16   | 16  |
| 596 | Neu5Aca2-3Galb1-4GlcNAcb1-3Galb1-4GlcNAcb1-6(Neu5Aca2-3Galb1-4GlcNAcb1-3Galb1-4GlcNAcb1-3)GalNAca-Sp14                                                                    | -16   | 10  |
| 589 | Galb1-4GlcNAcb1-3Galb1-4GlcNAcb1-3GalNAca-Sp14                                                                                                                            | -29   | 31  |
| 444 | (6S)Galb1-3(6S)GlcNAc-Sp0                                                                                                                                                 | -38   | 12  |
| 464 | Neu5Aca2-6Galb1-4GlcNAcb1-4Mana1-6(GlcNAcb1-4)(Neu5Aca2-6Galb1-4GlcNAcb1-4(Neu5Aca2-6Galb1-4GlcNAcb1-2)Mana1-3)Manb1-4GlcNAcb1-4GlcNAcb-Sp21                              | -39   | 45  |
| 264 | Neu5Aca2-3Galb1-4Glc-Sp8                                                                                                                                                  | -40   | 33  |
| 520 | Neu5Aca2-6Galb1-4GlcNAcb1-2Man-Sp0                                                                                                                                        | -42   | 15  |
| 183 | GlcNAcb1-3Galb1-4GlcNAcb-Sp8                                                                                                                                              | -47   | 8   |
| 441 | Neu5Aca2-3Galb1-4GlcNAcb1-3Galb-Sp8                                                                                                                                       | -58   | 23  |
| 346 | Mana1-6(Neu5Aca2-6Galb1-4GlcNAcb1-2Mana1-3)Manb1-4GlcNAcb1-4GlcNAc-Sp12                                                                                                   | -65   | 1   |
| 597 | Neu5Aca2-6Galb1-4GlcNAcb1-3Galb1-4GlcNAcb1-3GalNAca-Sp14                                                                                                                  | -109  | 21  |
| 445 | Fuca1-2Galb1-4 GlcNAcb1-2Mana1-6(Fuca1-2Galb1-4GlcNAcb1-2(Fuca1-2Galb1-4GlcNAcb1-4)Mana1-3)Manb1-4GlcNAcb1-4GlcNAcb-Sp12                                                  | -133  | 45  |
| 103 | Gala1-3(Fuca1-2)Galb1-4(Fuca1-3)GlcNAcb-Sp0                                                                                                                               | -147  | 93  |
| 31  | (3S)Galb1-3GlcNAcb-Sp8                                                                                                                                                    | -163  | 13  |
| 21  | GlcNAcb1-6(GlcNAcb1-4)(GlcNAcb1-3)GlcNAc-Sp8                                                                                                                              | -246  | 157 |
| 182 | GlcNAcb1-3Galb1-4GlcNAcb-Sp0                                                                                                                                              | -597  | 238 |
| 466 | Neu5Aca2-6Galb1-4GlcNAcb1-6(Neu5Aca2-6Galb1-4GlcNAcb1-2)Mana1-6(GlcNAcb1-4)(Neu5Aca2-6Galb1-4GlcNAcb1-4(Neu5Aca2-6Galb1-4GlcNAcb1-2)Mana1-3)Manb1-4GlcNAcb1-4GlcNAcb-Sp21 | -840  | 250 |
| 471 | Neu5Aca2-3Galb1-4GlcNAcb1-6(Neu5Aca2-3Galb1-4GlcNAcb1-3)GalNAca-Sp14                                                                                                      | -1073 | 101 |

| Glycan Number | Rank order at 90 µg/ml                                                                                                | Average RFU | Standard deviation |
|---------------|-----------------------------------------------------------------------------------------------------------------------|-------------|--------------------|
| 514           | GalNAcb1-4(6S)GlcNAc-Sp8                                                                                              | 22308       | 897                |
| 192           | GlcNAcb1-6GalNAca-Sp8                                                                                                 | 22160       | 4276               |
| 98            | GalNAcb1-4GlcNAcb-Sp0                                                                                                 | 12164       | 10120              |
| 4             | GalNAca-Sp8                                                                                                           | 7979        | 683                |
| 491           | Neu5Aca2-3Galb1-3GlcNAcb1-6GalNAca-Sp14                                                                               | 5486        | 1892               |
| 306           | GalNAcb1-3Galb-Sp8                                                                                                    | 5327        | 779                |
| 7             | Fuca-Sp9                                                                                                              | 5263        | 1162               |
| 563           | GalNAcb1-4GlcNAcb1-3GalNAcb1-4GlcNAcb-Sp0                                                                             | 5121        | 84                 |
| 519           | GalNAca1-3(Fuca1-2)Galb1-4GlcNAcb1-6GalNAc-Sp14                                                                       | 5091        | 213                |
| 512           | (6S)GalNAcb1-4GlcNAc-Sp8                                                                                              | 4856        | 3594               |
| 334           | GalNAcb1-3Gala1-4Galb1-4GlcNAcb1-3Galb1-4Glc-Sp0                                                                      | 4670        | 290                |
| 131           | Galb1-4GlcNAcb1-6GalNAca-Sp8                                                                                          | 4230        | 97                 |
| 408           | GalNAcb1-3Gala1-6Galb1-4Glc-Sp8                                                                                       | 4112        | 252                |
| 562           | GalNAcb1-3GlcNAcb-Sp0                                                                                                 | 4103        | 274                |
| 506           | GalNAca1-3(Fuca1-2)Galb1-3GlcNAcb1-6GalNAca-Sp14                                                                      | 4040        | 97                 |
| 93            | GalNAca1-4(Fuca1-2)Galb1-4GlcNAcb-Sp8                                                                                 | 3789        | 176                |
| 590           | Galb1-4GlcNAcb1-3Galb1-4GlcNAcb1-6(Galb1-3)GalNAca-Sp14                                                               | 3542        | 7060               |
| 495           | Gala1-3Galb1-4GlcNAcb1-6GalNAca-Sp14                                                                                  | 3454        | 257                |
| 494           | Fuca1-2Galb1-4GlcNAcb1-6GalNAca-Sp14                                                                                  | 3419        | 328                |
| 96            | GalNAcb1-3Gala1-4Galb1-4GlcNAcb-Sp0                                                                                   | 3248        | 427                |
| 265           | Neu5Aca2-6GalNAca-Sp8                                                                                                 | 3185        | 209                |
| 15            | GalNAcb-Sp8                                                                                                           | 3159        | 397                |
| 92            | GalNAca1-3Galb-Sp8                                                                                                    | 3095        | 99                 |
| 402           | GalNAca1-3GalNAcb1-3Gala1-4Galb1-4GlcNAcb-Sp0                                                                         | 2942        | 313                |
| 97            | GalNAcb1-4(Fuca1-3)GlcNAcb-Sp0                                                                                        | 2848        | 116                |
| 5             | GalNAca-Sp15                                                                                                          | 2832        | 137                |
| 488           | Galb1-3GlcNAcb1-6GalNAca-Sp14                                                                                         | 2828        | 198                |
| 95            | GalNAcb1-3(Fuca1-2)Galb-Sp8                                                                                           | 2822        | 345                |
| 193           | GlcNAcb1-6GalNAca-Sp14                                                                                                | 2806        | 206                |
| 528           | GalNAcb1-4GlcNAcb1-2Mana-Sp0                                                                                          | 2786        | 135                |
| 479           | Neu5Aca2-3Galb1-4GlcNAcb1-6GalNAca-Sp14                                                                               | 2665        | 174                |
| 266           | Neu5Aca2-6GalNAcb1-4GlcNAcb-Sp0                                                                                       | 2542        | 82                 |
| 373           | GalNAca1-3(Fuca1-2)Galb1-3GlcNAcb1-2Mana1-6(GalNAca1-3(Fuca1-2)Galb1-3GlcNAcb1-2Mana1-3)Manb1-4GlcNAcb1-4GlcNAcb-Sp20 | 2513        | 157                |
| 503           | GalNAcb1-4(Fuca1-3)(6S)GlcNAcb-Sp8                                                                                    | 2496        | 578                |
| 233           | GalNAcb1-4(Neu5Aca2-3)Galb1-4Glc-Sp0                                                                                  | 2397        | 244                |
| 489           | Gala1-3Galb1-3GlcNAcb1-6GalNAca-Sp14                                                                                  | 2331        | 129                |
| 285           | Neu5Gca2-6GalNAca-Sp0                                                                                                 | 2215        | 300                |
| 226           | GalNAcb1-4(Neu5Aca2-8Neu5Aca2-8Neu5Aca2-3)Galb1-4Glc-Sp0                                                              | 2212        | 196                |
| 525           | Gala1-3(Fuca1-2)Galb1-3GlcNAcb1-6GalNAc-Sp14                                                                          | 2176        | 200                |
| 82            | GalNAca1-3(Fuca1-2)Galb1-3GlcNAcb-Sp0                                                                                 | 2146        | 179                |
| 228           | GalNAcb1-4(Neu5Aca2-8Neu5Aca2-3)Galb1-4Glc-Sp0                                                                        | 2128        | 168                |
| 86            | GalNAca1-3(Fuca1-2)Galb1-4GlcNAcb-Sp8                                                                                 | 2029        | 36                 |
| 225           | GalNAcb1-4(Neu5Aca2-8Neu5Aca2-8Neu5Aca2-8Neu5Aca2-3)Galb1-4Glc-Sp0                                                    | 1985        | 110                |
| 335           | GalNAca1-3(Fuca1-2)Galb1-4GlcNAcb1-3Galb1-4GlcNAcb-Sp0                                                                | 1935        | 87                 |
| 232           | GalNAcb1-4(Neu5Aca2-3)Galb1-4GlcNAcb-Sp8                                                                              | 1897        | 162                |
| 90            | GalNAca1-3(Fuca1-2)Galb-Sp18                                                                                          | 1871        | 281                |
| 523           | GalNAca1-3(Fuca1-2)Galb1-4 GlcNAcb1-2Mana-Sp0                                                                         | 1815        | 103                |

|     |                                                                                                                                                                                                                                                                                        |      |     |
|-----|----------------------------------------------------------------------------------------------------------------------------------------------------------------------------------------------------------------------------------------------------------------------------------------|------|-----|
| 370 | GalNAca1-3(Fuca1-2)Galb1-4GlcNAcb1-2Mana1-6(GalNAca1-3(Fuca1-2)Galb1-4GlcNAcb1-2Mana1-3)Manb1-4GlcNAcb1-4GlcNAcb-Sp20                                                                                                                                                                  | 1680 | 252 |
| 91  | GalNAca1-3GalNAcb-Sp8                                                                                                                                                                                                                                                                  | 1536 | 256 |
| 87  | GalNAca1-3(Fuca1-2)Galb1-4Glc-Sp0                                                                                                                                                                                                                                                      | 1450 | 170 |
| 536 | GalNAca1-3(Fuca1-2)Galb1-3GalNAcb1-3Gala1-4Galb1-4Glc-Sp21                                                                                                                                                                                                                             | 1328 | 282 |
| 89  | GalNAca1-3(Fuca1-2)Galb-Sp8                                                                                                                                                                                                                                                            | 1297 | 215 |
| 231 | GalNAcb1-4(Neu5Aca2-3)Galb1-4GlcNAcb-Sp0                                                                                                                                                                                                                                               | 1168 | 270 |
| 379 | GalNAcb1-4GlcNAcb1-2Mana1-6(GalNAcb1-4GlcNAcb1-2Mana1-3)Manb1-4GlcNAcb1-4GlcNAcb-Sp12                                                                                                                                                                                                  | 1138 | 115 |
| 132 | Galb1-4GlcNAcb1-6GalNAcb-Sp14                                                                                                                                                                                                                                                          | 1112 | 57  |
| 451 | GalNAca1-3(Fuca1-2)Galb1-4GlcNAcb1-6(GalNAca1-3(Fuca1-2)Galb1-4GlcNAcb1-3)GalNAcb-Sp14                                                                                                                                                                                                 | 1056 | 100 |
| 336 | GalNAca1-3(Fuca1-2)Galb1-4GlcNAcb1-3Galb1-4GlcNAcb1-3Galb1-4GlcNAcb-Sp0                                                                                                                                                                                                                | 1055 | 75  |
| 415 | GalNAca1-3GalNAcb1-3Gala1-4Galb1-4Glc-Sp0                                                                                                                                                                                                                                              | 988  | 38  |
| 490 | Galb1-3(Fuca1-4)GlcNAcb1-6GalNAca-Sp14                                                                                                                                                                                                                                                 | 921  | 27  |
| 424 | GalNAca1-3(Fuca1-2)Galb1-3GlcNAcb1-3GalNAcb-Sp14                                                                                                                                                                                                                                       | 886  | 215 |
| 502 | Neu5Aca2-6GalNAcb1-4(6S)GlcNAcb-Sp8                                                                                                                                                                                                                                                    | 810  | 50  |
| 392 | GalNAcb1-4(Neu5Aca2-3)Galb1-4GlcNAcb1-3GalNAca-Sp14                                                                                                                                                                                                                                    | 760  | 83  |
| 83  | GalNAca1-3(Fuca1-2)Galb1-4(Fuca1-3)GlcNAcb-Sp0                                                                                                                                                                                                                                         | 752  | 51  |
| 393 | GalNAca1-3(Fuca1-2)Galb1-3GalNAca1-3(Fuca1-2)Galb1-4GlcNAcb-Sp0                                                                                                                                                                                                                        | 750  | 489 |
| 282 | Neu5Gca2-3Galb1-4(Fuca1-3)GlcNAcb-Sp0                                                                                                                                                                                                                                                  | 747  | 19  |
| 144 | Galb1-3GalNAcb1-4(Neu5Aca2-3)Galb1-4Glc-Sp0                                                                                                                                                                                                                                            | 735  | 22  |
| 447 | Galb1-4(Fuca1-3)GlcNAcb1-6GalNAcb-Sp14                                                                                                                                                                                                                                                 | 700  | 45  |
| 414 | GalNAca1-3(Fuca1-2)Galb1-4GlcNAcb1-3GalNAca-Sp14                                                                                                                                                                                                                                       | 673  | 22  |
| 94  | GalNAcb1-3GalNAca-Sp8                                                                                                                                                                                                                                                                  | 647  | 43  |
| 85  | GalNAca1-3(Fuca1-2)Galb1-4GlcNAcb-Sp0                                                                                                                                                                                                                                                  | 592  | 106 |
| 143 | Galb1-3GalNAcb1-3Gala1-4Galb1-4Glc-Sp0                                                                                                                                                                                                                                                 | 576  | 58  |
| 278 | Neu5Acb2-6GalNAca-Sp8                                                                                                                                                                                                                                                                  | 560  | 72  |
| 411 | Galb1-3GalNAcb1-4(Neu5Aca2-8Neu5Aca2-3)Galb1-4Glc-Sp0                                                                                                                                                                                                                                  | 466  | 53  |
| 454 | GalNAca1-3(Fuca1-2)Galb1-4GlcNAcb1-2Mana1-6(GalNAca1-3(Fuca1-2)Galb1-4GlcNAcb1-2Mana1-3)Manb1-4GlcNAcb1-4(Fuca1-6)GlcNAcb-Sp22                                                                                                                                                         | 460  | 60  |
| 448 | Galb1-4GlcNAcb1-2Mana-Sp0                                                                                                                                                                                                                                                              | 429  | 47  |
| 63  | Fuca1-2Galb1-3GalNAcb1-4(Neu5Aca2-3)Galb1-4Glc-Sp0                                                                                                                                                                                                                                     | 262  | 19  |
| 457 | GalNAca1-3(Fuca1-2)Galb1-3GlcNAcb1-2Mana1-6(GalNAca1-3(Fuca1-2)Galb1-3GlcNAcb1-2Mana1-3)Manb1-4GlcNAcb1-4(Fuca1-6)GlcNAcb-Sp22                                                                                                                                                         | 227  | 167 |
| 152 | Galb1-4(Fuca1-3)GlcNAcb-Sp8                                                                                                                                                                                                                                                            | 225  | 130 |
| 559 | Galb1-4GlcNAcb1-3Galb1-4GlcNAcb1-6(Galb1-4GlcNAcb1-3Galb1-4GlcNAcb1-2)Mana1-6(Galb1-4GlcNAcb1-3Galb1-4GlcNAcb1-2Mana1-3)Mana1-4GlcNAcb1-4GlcNAcb-Sp24                                                                                                                                  | 222  | 5   |
| 377 | Neu5Aca2-6Galb1-4GlcNAcb1-3GalNAcb-Sp14                                                                                                                                                                                                                                                | 219  | 33  |
| 166 | Galb1-4GlcNAcb1-6(Galb1-3)GalNAca-Sp8                                                                                                                                                                                                                                                  | 213  | 9   |
| 244 | Neu5Aca2-6(Neu5Aca2-3Galb1-3)GalNAca-Sp14                                                                                                                                                                                                                                              | 174  | 11  |
| 77  | Fuca1-2Galb1-4Glc-Sp0                                                                                                                                                                                                                                                                  | 163  | 21  |
| 3   | Mana-Sp8                                                                                                                                                                                                                                                                               | 157  | 23  |
| 390 | Fuca1-2Galb1-3GalNAca1-3(Fuca1-2)Galb1-4GlcNAcb-Sp0                                                                                                                                                                                                                                    | 119  | 24  |
| 174 | GlcNAca1-6Galb1-4GlcNAcb-Sp8                                                                                                                                                                                                                                                           | 109  | 19  |
| 571 | Galb1-3GlcNAcb1-3Galb1-4GlcNAcb1-3Galb1-4GlcNAcb1-6(Galb1-3GlcNAcb1-3Galb1-4GlcNAcb1-3Galb1-4GlcNAcb1-2)Mana1-6(Galb1-3GlcNAcb1-3Galb1-4GlcNAcb1-3Galb1-4GlcNAcb1-2)Mana1-3)Manb1-4GlcNAcb1-4(Fuca1-6)GlcNAcb-Sp24                                                                     | 101  | 33  |
| 418 | GalNAca1-3(Fuca1-2)Galb1-4(Fuca1-3)GlcNAcb1-3GalNAcb-Sp14                                                                                                                                                                                                                              | 100  | 31  |
| 588 | Galb1-4GlcNAcb1-3Galb1-4GlcNAcb1-3Galb1-4GlcNAcb1-3Galb1-4GlcNAcb1-6(Galb1-4GlcNAcb1-3Galb1-4GlcNAcb1-3Galb1-4GlcNAcb1-3Galb1-4GlcNAcb1-3Galb1-4GlcNAcb1-2)Mana1-6(Galb1-4GlcNAcb1-3Galb1-4GlcNAcb1-3Galb1-4GlcNAcb1-3Galb1-4GlcNAcb1-2)Mana1-3)Manb1-4GlcNAcb1-4(Fuca1-6)GlcNAcb-Sp24 | 97   | 8   |
| 236 | Neu5Aca2-3GalNAca-Sp8                                                                                                                                                                                                                                                                  | 93   | 25  |
| 158 | Galb1-4GalNAcb1-3(Fuca1-2)Galb1-4GlcNAcb-Sp8                                                                                                                                                                                                                                           | 86   | 16  |
| 136 | Neu5Aca2-6(Galb1-3)GalNAca-Sp14                                                                                                                                                                                                                                                        | 81   | 23  |
| 145 | Galb1-3GalNAcb1-4Galb1-4Glc-Sp8                                                                                                                                                                                                                                                        | 80   | 24  |
| 428 | Galb1-3GlcNAcb1-6(Galb1-3GlcNAcb1-2)Mana1-6(Galb1-3GlcNAcb1-2Mana1-3)Manb1-4GlcNAcb1-4GlcNAcb-Sp19                                                                                                                                                                                     | 79   | 20  |



|     |                                                                                                                                                                        |    |    |
|-----|------------------------------------------------------------------------------------------------------------------------------------------------------------------------|----|----|
| 468 | Gala1-3(Fuca1-2)Galb1-3GalNAcb-Sp8                                                                                                                                     | 37 | 12 |
| 575 | Galb1-4GlcNAcb1-3Galb1-4GlcNAcb1-2Mana1-6(Galb1-4GlcNAcb1-3Galb1-4GlcNAcb1-2Mana1-3)Manb1-4GlcNAcb1-4(Fuca1-6)GlcNAcb-Sp24                                             | 37 | 20 |
| 365 | Fuca1-4(Galb1-3)GlcNAcb1-2Mana1-6(Fuca1-4(Galb1-3)GlcNAcb1-2Mana1-3)Manb1-4GlcNAcb1-4(Fuca1-6)GlcNAcb-Sp22                                                             | 36 | 7  |
| 551 | Galb1-3GlcNAcb1-3Galb1-4GlcNAcb1-2Mana1-6(Galb1-3GlcNAcb1-3Galb1-4GlcNAcb1-2Mana1-3)Manb1-4GlcNAcb1-4GlcNAcb-Sp25                                                      | 36 | 18 |
| 173 | GlcNAca1-3Galb1-4GlcNAcb-Sp8                                                                                                                                           | 35 | 34 |
| 446 | Fuca1-2Galb1-4(Fuca1-3)GlcNAcb1-2Mana1-6(Fuca1-2Galb1-4(Fuca1-3)GlcNAcb1-4(Fuca1-2Galb1-4(Fuca1-3)GlcNAcb1-2)Mana1-3)Manb1-4GlcNAcb1-4GlcNAcb-Sp12                     | 35 | 8  |
| 299 | Neu5Aca2-3Galb1-4(Fuca1-3)GlcNAcb1-6(Galb1-3)GalNAca-Sp14                                                                                                              | 35 | 15 |
| 583 | GlcNAcb1-3Galb1-4GlcNAcb1-3Galb1-4GlcNAcb1-6(GlcNAcb1-3Galb1-4GlcNAcb1-3Galb1-4GlcNAcb1-3Galb1-4GlcNAcb1-2Mana1-3)Manb1-4GlcNAcb1-4(Fuca1-6)GlcNAcb-Sp24               | 35 | 17 |
| 586 | Galb1-4GlcNAcb1-3Galb1-4GlcNAcb1-3Galb1-4GlcNAcb1-6(Galb1-4GlcNAcb1-3Galb1-4GlcNAcb1-3Galb1-4GlcNAcb1-3Galb1-4GlcNAcb1-2Mana1-3)Manb1-4GlcNAcb1-4(Fuca1-6)GlcNAcb-Sp24 | 35 | 6  |
| 541 | Galb1-4GlcNAcb1-3Galb1-4GlcNAcb1-2Mana1-6(Galb1-4GlcNAcb1-3Galb1-4GlcNAcb1-2Mana1-3)Manb1-4GlcNAcb1-4GlcNAcb-Sp12                                                      | 34 | 7  |
| 404 | Gala1-4Galb1-4GlcNAcb1-2Mana1-6(Gala1-4Galb1-4GlcNAcb1-2Mana1-3)Manb1-4GlcNAcb1-4GlcNAcb-Sp24                                                                          | 34 | 12 |
| 43  | (6S)Galb1-4Glc-Sp8                                                                                                                                                     | 34 | 22 |
| 545 | GlcNAcb1-3Galb1-4GlcNAcb1-3Galb1-4GlcNAcb1-2Mana1-6(GlcNAcb1-3Galb1-4GlcNAcb1-3Galb1-4GlcNAcb1-2Mana1-3)Manb1-4GlcNAcb1-4GlcNAcb-Sp12                                  | 34 | 8  |
| 465 | Neu5Aca2-6Galb1-4GlcNAcb1-6(Neu5Aca2-6Galb1-4GlcNAcb1-2)Mana1-6(GlcNAcb1-4)(Neu5Aca2-6Galb1-4GlcNAcb1-2Mana1-3)Manb1-4GlcNAcb1-4GlcNAcb-Sp21                           | 34 | 39 |
| 24  | (3S)Galb1-4(Fuca1-3)(6S)Glc-Sp0                                                                                                                                        | 33 | 22 |
| 470 | Glca1-4Glca1-4Glca1-4Glc-Sp10                                                                                                                                          | 33 | 11 |
| 27  | (3S)Galb1-4(6S)Glc-Sp8                                                                                                                                                 | 33 | 9  |
| 121 | Gala1-4Galb1-4GlcNAcb-Sp8                                                                                                                                              | 33 | 14 |
| 542 | Galb1-4GlcNAcb1-3Galb1-4GlcNAcb1-2Mana1-6(Galb1-4GlcNAcb1-3Galb1-4GlcNAcb1-2Mana1-3)Manb1-4GlcNAcb1-4GlcNAcb-Sp24                                                      | 32 | 18 |
| 109 | Gala1-4(Gala1-3)Galb1-4GlcNAcb-Sp8                                                                                                                                     | 32 | 29 |
| 577 | Galb1-4GlcNAcb1-3Galb1-4GlcNAcb1-3Galb1-4GlcNAcb1-2Mana1-6(Galb1-4GlcNAcb1-3Galb1-4GlcNAcb1-3Galb1-4GlcNAcb1-2Mana1-3)Manb1-4GlcNAcb1-4(Fuca1-6)GlcNAcb-Sp24           | 32 | 10 |
| 6   | Fuca-Sp8                                                                                                                                                               | 32 | 26 |
| 110 | Gala1-3GalNAca-Sp8                                                                                                                                                     | 31 | 8  |
| 263 | Neu5Aca2-3Galb1-4Glc-Sp0                                                                                                                                               | 31 | 8  |
| 426 | Fuca1-2Galb1-3GlcNAcb1-2Mana1-6(Fuca1-2Galb1-3GlcNAcb1-2Mana1-3)Manb1-4GlcNAcb1-4(Fuca1-6)GlcNAcb-Sp22                                                                 | 31 | 9  |
| 576 | GlcNAcb1-3Galb1-4GlcNAcb1-3Galb1-4GlcNAcb1-2Mana1-6(GlcNAcb1-3Galb1-4GlcNAcb1-3Galb1-4GlcNAcb1-2Mana1-3)Manb1-4GlcNAcb1-4(Fuca1-6)GlcNAcb-Sp24                         | 31 | 4  |
| 453 | GalNAcb1-4Galb1-4Glc-Sp0                                                                                                                                               | 31 | 15 |
| 151 | Galb1-4(Fuca1-3)GlcNAcb-Sp0                                                                                                                                            | 31 | 15 |
| 318 | Neu5Aca2-6Galb1-4GlcNAcb1-2Mana1-6(Neu5Aca2-3Galb1-4GlcNAcb1-2Mana1-3)Manb1-4GlcNAcb1-4GlcNAcb-Sp12                                                                    | 30 | 16 |
| 224 | Neu5Aca2-3Galb1-3GalNAca-Sp14                                                                                                                                          | 30 | 13 |
| 450 | Gala1-3(Fuca1-2)Galb1-4GlcNAcb1-6(Gala1-3(Fuca1-2)Galb1-4GlcNAcb1-3)GalNAcb-Sp14                                                                                       | 29 | 17 |
| 524 | Galb1-3GlcNAcb1-2Mana-Sp0                                                                                                                                              | 29 | 10 |
| 475 | GlcNAcb1-6(GlcNAcb1-2)Mana1-6(GlcNAcb1-2Mana1-3)Manb1-4GlcNAcb1-4(Fuca1-6)GlcNAcb-Sp24                                                                                 | 29 | 7  |
| 59  | Fuca1-2Galb1-3GalNAcb1-3Gala1-4Galb1-4Glc-Sp9                                                                                                                          | 29 | 12 |
| 142 | Galb1-3GalNAcb-Sp8                                                                                                                                                     | 29 | 12 |
| 473 | Fuca1-2Galb1-3(Fuca1-4)GlcNAcb1-2Mana1-6(Fuca1-2Galb1-3(Fuca1-4)GlcNAcb1-2Mana1-3)Manb1-4GlcNAcb1-4(Fuca1-6)GlcNAcb1-4(Fuca1-6)GlcNAcb-Sp19                            | 29 | 8  |
| 168 | Galb1-4GlcNAcb-Sp0                                                                                                                                                     | 28 | 15 |
| 12  | Galb-Sp8                                                                                                                                                               | 28 | 10 |
| 20  | Galb1-4GlcNAcb1-6(Galb1-4GlcNAcb1-3)GalNAcb-Sp14                                                                                                                       | 28 | 9  |
| 352 | GlcNAcb1-2Mana1-6(GlcNAcb1-2Mana1-3)Manb1-4GlcNAcb1-4(Fuca1-6)GlcNAcb-Sp22                                                                                             | 28 | 9  |
| 167 | Galb1-4GlcNAcb1-6(Galb1-3)GalNAcb-Sp14                                                                                                                                 | 27 | 12 |
| 108 | Gala1-3(Fuca1-2)Galb-Sp18                                                                                                                                              | 27 | 20 |
| 544 | Fuca1-2Galb1-4GlcNAcb1-3Galb1-4GlcNAcb1-2Mana1-6(Fuca1-2Galb1-4GlcNAcb1-3Galb1-4GlcNAcb1-2Mana1-3)Manb1-4GlcNAcb1-4GlcNAcb-Sp24                                        | 27 | 9  |
| 546 | GlcNAcb1-3Galb1-4GlcNAcb1-3Galb1-4GlcNAcb1-2Mana1-6(GlcNAcb1-3Galb1-4GlcNAcb1-3Galb1-4GlcNAcb1-2Mana1-3)Manb1-4GlcNAcb1-4GlcNAcb-Sp25                                  | 27 | 14 |
| 501 | Fuca1-2(6S)Galb1-3(6S)GlcNAcb-Sp0                                                                                                                                      | 27 | 6  |
| 382 | Galb1-3GlcNAcb1-3Galb1-4GlcNAcb1-6(Galb1-3GlcNAcb1-3)Galb1-4Glc-Sp0                                                                                                    | 27 | 7  |
| 591 | Galb1-4GlcNAcb1-3Galb1-4GlcNAcb1-6(Galb1-4GlcNAcb1-3Galb1-4GlcNAcb1-3)GalNAca-Sp14                                                                                     | 27 | 9  |

|     |                                                                                                                                          |    |    |
|-----|------------------------------------------------------------------------------------------------------------------------------------------|----|----|
| 291 | Galb1-4(Fuca1-3)(6S)GlcB-Sp0                                                                                                             | 27 | 23 |
| 477 | Neu5Aca2-6Galb1-4GlcNAcb1-6(Galb1-3GlcNAcb1-3)Galb1-4GlcB-Sp21                                                                           | 26 | 11 |
| 324 | Galb1-3GlcNAcb1-2Mana1-6(Galb1-3GlcNAcb1-2Mana1-3)Manb1-4GlcNAcb1-4GlcNAcb-Sp19                                                          | 26 | 13 |
| 70  | Fuca1-2Galb1-4(Fuca1-3)GlcNAcb1-3Galb1-4(Fuca1-3)GlcNAcb1-3Galb1-4(Fuca1-3)GlcNAcb-Sp0                                                   | 26 | 19 |
| 337 | Neu5Aca2-3Galb1-4(Fuca1-3)GlcNAcb1-6(Neu5Aca2-3Galb1-3)GalNAc-Sp14                                                                       | 26 | 29 |
| 371 | Gala1-3(Fuca1-2)Galb1-4GlcNAcb1-2Mana1-6(Gala1-3(Fuca1-2)Galb1-4GlcNAcb1-2Mana1-3)Manb1-4GlcNAcb1-4GlcNAcb-Sp20                          | 26 | 5  |
| 288 | Neu5Aca2-3Galb1-4GlcNAcb1-6(Galb1-3)GalNAca-Sp14                                                                                         | 26 | 13 |
| 481 | Neu5Aca2-6Galb1-4 GlcNAcb1-6(Neu5Aca2-6Galb1-4GlcNAcb1-3)GalNAca-Sp14                                                                    | 26 | 3  |
| 429 | Galb1-4GlcNAcb1-6(Fuca1-2Galb1-3GlcNAcb1-3)Galb1-4Glc-Sp21                                                                               | 25 | 14 |
| 78  | Fuca1-2Galb-Sp8                                                                                                                          | 25 | 3  |
| 165 | Galb1-4GlcNAcb1-3Galb1-4GlcB-Sp8                                                                                                         | 25 | 4  |
| 135 | Neu5Aca2-6(Galb1-3)GalNAca-Sp8                                                                                                           | 25 | 18 |
| 566 | GlcNAcb1-3Galb1-3GalNAc-Sp14                                                                                                             | 25 | 7  |
| 290 | Galb1-4(Fuca1-3)(6S)GlcNAcb-Sp0                                                                                                          | 24 | 6  |
| 413 | Gala1-3(Fuca1-2)Galb1-4GlcNAcb1-3GalNAca-Sp14                                                                                            | 24 | 17 |
| 493 | Galb1-4(Fuca1-3)GlcNAcb1-6(Neu5Aca2-6(Neu5Aca2-3Galb1-3)GlcNAcb1-3)Galb1-4Glc-Sp21                                                       | 24 | 15 |
| 405 | Gala1-3Galb1-4GlcNAcb1-3GalNAca-Sp14                                                                                                     | 24 | 8  |
| 342 | GlcNAca1-4Galb1-4GlcNAcb1-3Galb1-4(Fuca1-3)GlcNAcb1-3Galb1-4(Fuca1-3)GlcNAcb-Sp0                                                         | 24 | 3  |
| 139 | Galb1-3GalNAca-Sp8                                                                                                                       | 24 | 12 |
| 406 | Galb1-3GlcNAcb1-6Galb1-4GlcNAcb-Sp0                                                                                                      | 24 | 14 |
| 505 | Fuca1-2Galb1-3GlcNAcb1-6(Fuca1-2Galb1-3GlcNAcb1-3)GalNAca-Sp14                                                                           | 24 | 21 |
| 212 | Mana1-2Mana1-6(Mana1-2Mana1-3)Mana1-6(Mana1-2Mana1-2Mana1-3)Manb1-4GlcNAcb1-4GlcNAcb-Sp12                                                | 24 | 14 |
| 540 | GlcNAcb1-3Galb1-4GlcNAcb1-2Mana1-6(GlcNAcb1-3Galb1-4GlcNAcb1-2Mana1-3)Manb1-4GlcNAcb1-4GlcNAcb-Sp25                                      | 24 | 13 |
| 560 | Gala1-3Galb1-4GlcNAcb1-2Mana1-6(Gala1-3Galb1-4GlcNAcb1-2Mana1-3)Manb1-4GlcNAcb1-4GlcNAc-Sp24                                             | 23 | 14 |
| 111 | Gala1-3GalNAca-Sp16                                                                                                                      | 23 | 10 |
| 484 | Mana1-6(Mana1-3)Manb1-4GlcNAcb1-4(Fuca1-6)GlcNAcb-Sp19                                                                                   | 23 | 12 |
| 194 | GlcNAcb1-6Galb1-4GlcNAcb-Sp8                                                                                                             | 23 | 15 |
| 508 | Galb1-4GlcNAcb1-6(Galb1-4GlcNAcb1-2)Mana1-6(GlcNAcb1-4)Galb1-4GlcNAcb1-4(Galb1-4GlcNAcb1-2)Mana1-3)Manb1-4GlcNAcb1-4(Fuca1-6)GlcNAc-Sp21 | 23 | 11 |
| 33  | (3S)Galb1-4(Fuca1-3)GlcNAc-Sp8                                                                                                           | 23 | 15 |
| 106 | Gala1-3(Fuca1-2)Galb1-4GlcB-Sp0                                                                                                          | 23 | 9  |
| 358 | KDNa2-3Galb1-4Glc-Sp0                                                                                                                    | 23 | 20 |
| 474 | Neu5Aca2-3Galb1-3GlcNAcb1-6(Neu5Aca2-3Galb1-3GlcNAcb1-2)Mana1-6(Neu5Aca2-3Galb1-3GlcNAcb1-2Mana1-3)Manb1-4GlcNAcb1-4GlcNAcb-Sp19         | 23 | 6  |
| 73  | Fuca1-2Galb1-4GlcNAcb1-3Galb1-4GlcNAcb-Sp0                                                                                               | 23 | 6  |
| 403 | Gala1-4Galb1-3GlcNAcb1-2Mana1-6(Gala1-4Galb1-3GlcNAcb1-2Mana1-3)Manb1-4GlcNAcb1-4GlcNAcb-Sp19                                            | 22 | 11 |
| 55  | Neu5Aca2-6Galb1-4GlcNAcb1-2Mana1-6(Neu5Aca2-6Galb1-4GlcNAcb1-2Mana1-3)Manb1-4GlcNAcb1-4GlcNAcb-Sp12                                      | 22 | 14 |
| 376 | Neu5Aca2-3Galb1-4GlcNAcb1-3GalNAc-Sp14                                                                                                   | 22 | 15 |
| 270 | Neu5Aca2-6Galb1-4GlcNAcb1-3Galb1-4(Fuca1-3)GlcNAcb1-3Galb1-4(Fuca1-3)GlcNAcb-Sp0                                                         | 22 | 3  |
| 427 | Gala1-3(Fuca1-2)Galb1-4GlcNAcb1-2Mana1-6(Gala1-3(Fuca1-2)Galb1-4GlcNAcb1-2Mana1-3)Manb1-4GlcNAcb1-4(Fuca1-6)GlcNAcb-Sp22                 | 22 | 19 |
| 179 | GlcNAcb1-3GalNAca-Sp8                                                                                                                    | 22 | 18 |
| 10  | Neu5Aca-Sp11                                                                                                                             | 22 | 5  |
| 213 | Mana1-6(Mana1-3)Mana-Sp9                                                                                                                 | 22 | 13 |
| 504 | (3S)GalNAcb1-4(Fuca1-3)GlcNAcb-Sp8                                                                                                       | 22 | 20 |
| 40  | (4S)Galb1-4GlcNAcb-Sp8                                                                                                                   | 22 | 15 |
| 364 | Galb1-4GlcNAcb1-2Mana1-6(Mana1-3)Manb1-4GlcNAcb1-4GlcNAcb-Sp12                                                                           | 21 | 16 |
| 407 | Galb1-3GlcNAca1-6Galb1-4GlcNAcb-Sp0                                                                                                      | 21 | 15 |
| 32  | (3S)Galb1-4(Fuca1-3)GlcNAc-Sp0                                                                                                           | 21 | 6  |
| 29  | (3S)Galb1-3GalNAca-Sp8                                                                                                                   | 21 | 11 |
| 421 | GlcNAcb1-2(GlcNAcb1-6)Mana1-6(GlcNAcb1-2Mana1-3)Manb1-4GlcNAcb1-4GlcNAcb-Sp19                                                            | 21 | 11 |
| 485 | Galb1-4GlcNAcb1-6(Galb1-4GlcNAcb1-2)Mana1-6(Galb1-4GlcNAcb1-2Mana1-3)Manb1-4GlcNAcb1-4(Fuca1-6)GlcNAcb-Sp24                              | 21 | 14 |

|     |                                                                                                                                                                         |    |     |
|-----|-------------------------------------------------------------------------------------------------------------------------------------------------------------------------|----|-----|
| 262 | Fuca1-2Galb1-4(6S)GlcB-Sp0                                                                                                                                              | 21 | 5   |
| 476 | Galb1-3GlcNAcb1-2Mana1-6(GlcNAcb1-4)(Galb1-3GlcNAcb1-2Mana1-3)Manb1-4GlcNAcb1-4GlcNAcb-Sp21                                                                             | 21 | 20  |
| 156 | Galb1-4(6S)GlcB-Sp8                                                                                                                                                     | 21 | 9   |
| 547 | Galb1-4GlcNAcb1-3Galb1-4GlcNAcb1-3Galb1-4GlcNAcb1-2Mana1-6(Galb1-4GlcNAcb1-3Galb1-4GlcNAcb1-3Galb1-4GlcNAcb1-2Mana1-3)Manb1-4GlcNAcb1-4GlcNAcb-Sp12                     | 21 | 9   |
| 305 | Galb1-4GlcNAcb1-6Galb1-4GlcNAcb-Sp0                                                                                                                                     | 21 | 7   |
| 23  | 6S(3S)Galb1-4GlcNAcb-Sp0                                                                                                                                                | 21 | 17  |
| 416 | Fuca1-2Galb1-4(Fuca1-3)GlcNAcb1-3GalNAca-Sp14                                                                                                                           | 21 | 13  |
| 561 | GlcNAcb1-3Galb1-4GlcNAcb1-6(GlcNAcb1-3Galb1-3)GalNAca-Sp14                                                                                                              | 21 | 11  |
| 452 | Neu5Aca2-8Neu5Aca2-3Galb1-3GalNAcb1-4(Neu5Aca2-8Neu5Aca2-3)Galb1-4GlcB-Sp0                                                                                              | 21 | 5   |
| 57  | Neu5Aca2-6Galb1-4GlcNAcb1-2Mana1-6(Neu5Aca2-6Galb1-4GlcNAcb1-2Mana1-3)Manb1-4GlcNAcb1-4GlcNAcb-Sp24                                                                     | 21 | 4   |
| 71  | Fuca1-2Galb1-4(Fuca1-3)GlcNAcb-Sp0                                                                                                                                      | 21 | 7   |
| 350 | Galb1-4GlcNAcb1-2Mana1-6Manb1-4GlcNAcb1-4GlcNAcb-Sp12                                                                                                                   | 21 | 6   |
| 62  | Fuca1-2Galb1-3GalNAca-Sp14                                                                                                                                              | 20 | 17  |
| 609 | GlcNAcb1-3Fuca-Sp21                                                                                                                                                     | 20 | 6   |
| 549 | GlcNAcb1-3Galb1-4GlcNAcb1-3Galb1-4GlcNAcb1-3Galb1-4GlcNAcb1-2Mana1-6(GlcNAcb1-3Galb1-4GlcNAcb1-3Galb1-4GlcNAcb1-3Galb1-4GlcNAcb1-2Mana1-3)Manb1-4GlcNAcb1-4GlcNAcb-Sp25 | 20 | 5   |
| 381 | Galb1-3GalNAca1-3(Fuca1-2)Galb1-4GlcNAcb-Sp0                                                                                                                            | 20 | 8   |
| 383 | Galb1-4(Fuca1-3)GlcNAcb1-6(Galb1-3GlcNAcb1-3)Galb1-4Glc-Sp21                                                                                                            | 20 | 11  |
| 301 | Neu5Aca2-6Galb1-4GlcNAcb1-2Mana1-6(Galb1-4GlcNAcb1-2Mana1-3)Manb1-4GlcNAcb1-4GlcNAcb-Sp12                                                                               | 20 | 15  |
| 326 | Neu5Aca2-3Galb1-4GlcNAcb1-2Mana1-6(Neu5Aca2-6Galb1-4GlcNAcb1-2Mana1-3)Manb1-4GlcNAcb1-4GlcNAcb-Sp12                                                                     | 20 | 13  |
| 554 | Neu5Gca2-8Neu5Aca2-3Galb1-4GlcNAcb-Sp0                                                                                                                                  | 20 | 6   |
| 417 | Gala1-3(Fuca1-2)Galb1-4(Fuca1-3)GlcNAcb1-3GalNAcb-Sp14                                                                                                                  | 20 | 20  |
| 276 | Neu5Aca2-8Neu5Aca2-3Galb1-4GlcB-Sp0                                                                                                                                     | 19 | 10  |
| 309 | GlcNAcb1-3Man-Sp10                                                                                                                                                      | 19 | 17  |
| 188 | GlcNAcb1-4Galb1-4GlcNAcb-Sp8                                                                                                                                            | 19 | 6   |
| 99  | GalNAcb1-4GlcNAcb-Sp8                                                                                                                                                   | 19 | 793 |
| 199 | GlcB1-6GlcB-Sp8                                                                                                                                                         | 19 | 11  |
| 190 | GlcNAcb1-4GlcNAcb1-4GlcNAcb1-4GlcNAcb1-4GlcNAcb1-Sp8                                                                                                                    | 19 | 13  |
| 1   | Gala-Sp8                                                                                                                                                                | 19 | 13  |
| 254 | Neu5Aca2-3Galb1-4(Fuca1-3)GlcNAcb-Sp0                                                                                                                                   | 19 | 9   |
| 320 | GlcNAcb1-2Mana1-6(Neu5Aca2-6Galb1-4GlcNAcb1-2Mana1-3)Manb1-4GlcNAcb1-4GlcNAcb-Sp12                                                                                      | 19 | 3   |
| 130 | Fuca1-4(Galb1-3)GlcNAcb-Sp8                                                                                                                                             | 19 | 7   |
| 176 | GlcNAcb1-6(GlcNAcb1-3)GalNAca-Sp8                                                                                                                                       | 19 | 4   |
| 195 | GlcA1-4GlcB-Sp8                                                                                                                                                         | 19 | 9   |
| 69  | Fuca1-2Galb1-4(Fuca1-3)GlcNAcb1-3Galb1-4(Fuca1-3)GlcNAcb-Sp0                                                                                                            | 18 | 5   |
| 356 | KDNa2-3Galb1-4(Fuca1-3)GlcNAcb-Sp0                                                                                                                                      | 18 | 8   |
| 366 | Neu5Aca2-6GlcNAcb1-4GlcNAcb-Sp21                                                                                                                                        | 18 | 2   |
| 53  | GlcNAcb1-2Mana1-6(GlcNAcb1-2Mana1-3)Manb1-4GlcNAcb1-4GlcNAcb-Sp13                                                                                                       | 18 | 15  |
| 482 | Neu5Aca2-6Galb1-4GlcNAcb1-2Mana1-6(Neu5Aca2-6Galb1-4GlcNAcb1-2Mana1-3)Manb1-4GlcNAcb1-4(Fuca1-6)GlcNAcb-Sp24                                                            | 18 | 17  |
| 456 | Neu5Aca2-6Galb1-4GlcNAcb1-6(Fuca1-2Galb1-3GlcNAcb1-3)Galb1-4Glc-Sp21                                                                                                    | 18 | 18  |
| 120 | Gala1-4Galb1-4GlcNAcb-Sp0                                                                                                                                               | 18 | 13  |
| 594 | GlcNAcb1-3Galb1-4GlcNAcb1-6(Galb1-3)GalNAca-Sp14                                                                                                                        | 18 | 16  |
| 362 | Fuca1-2Galb1-4(Fuca1-3)GlcNAcb1-2Mana1-6(Fuca1-2Galb1-4(Fuca1-3)GlcNAcb1-2Mana1-3)Manb1-4GlcNAcb1-4GlcNAcb-Sp20                                                         | 18 | 6   |
| 153 | Galb1-4(Fuca1-3)GlcNAcb1-3Galb1-4(Fuca1-3)GlcNAcb-Sp0                                                                                                                   | 18 | 6   |
| 36  | (3S)Galb1-4GlcNAcb-Sp0                                                                                                                                                  | 18 | 10  |
| 394 | Gala1-3Galb1-3GlcNAcb1-2Mana1-6(Gala1-3Galb1-3GlcNAcb1-2Mana1-3)Manb1-4GlcNAcb1-4GlcNAcb-Sp19                                                                           | 18 | 11  |
| 47  | (6S)GlcNAcb-Sp8                                                                                                                                                         | 18 | 8   |
| 229 | Neu5Aca2-8Neu5Aca2-8Neu5Aca-Sp8                                                                                                                                         | 18 | 2   |
| 552 | Neu5Gca2-8Neu5Gca2-3Galb1-4GlcNAcb-Sp0                                                                                                                                  | 18 | 8   |
| 172 | Galb1-4GlcB-Sp8                                                                                                                                                         | 18 | 16  |





|     |                                                                                                                                              |    |    |
|-----|----------------------------------------------------------------------------------------------------------------------------------------------|----|----|
| 175 | GlcNAcb1-2Galb1-3GalNAca-Sp8                                                                                                                 | 15 | 8  |
| 461 | Neu5Aca2-3Galb1-4GlcNAcb1-6(Neu5Aca2-3Galb1-4GlcNAcb1-2)Mana1-6(GlcNAcb1-4)(Neu5Aca2-3Galb1-4GlcNAcb1-2Mana1-3)Manb1-4GlcNAcb1-4GlcNAcb-Sp21 | 15 | 7  |
| 25  | (3S)Galb1-4Glc-Sp8                                                                                                                           | 15 | 18 |
| 347 | Neu5Aca2-6Galb1-4GlcNAcb1-2Mana1-6Manb1-4GlcNAcb1-4GlcNAc-Sp12                                                                               | 15 | 9  |
| 127 | Galb1-3GlcNAcb1-3Galb1-4(Fuca1-3)GlcNAcb-Sp0                                                                                                 | 14 | 4  |
| 13  | Glc-Sp8                                                                                                                                      | 14 | 13 |
| 368 | Galb1-4(Fuca1-3)GlcNAcb1-6(Fuca1-2Galb1-4GlcNAcb1-3)Galb1-4Glc-Sp21                                                                          | 14 | 5  |
| 592 | Neu5Aca2-3Galb1-4GlcNAcb1-3Galb1-4GlcNAcb1-3GalNAca-Sp14                                                                                     | 14 | 5  |
| 496 | Galb1-4(Fuca1-3)GlcNAcb1-2Mana-Sp0                                                                                                           | 14 | 10 |
| 220 | Fuca1-2(6S)Galb1-4GlcNAcb-Sp0                                                                                                                | 14 | 10 |
| 401 | Galb1-4(Fuca1-3)GlcNAcb1-3GalNAca-Sp14                                                                                                       | 14 | 5  |
| 530 | GlcNAcb1-2 Mana1-6(GlcNAcb1-4)(GlcNAcb1-2Mana1-3)Manb1-4GlcNAcb1-4(Fuca1-6)GlcNAc-Sp21                                                       | 14 | 5  |
| 375 | Fuca1-4(Fuca1-2Galb1-3)GlcNAcb1-2Mana1-3(Fuca1-4(Fuca1-2Galb1-3)GlcNAcb1-2Mana1-3)Manb1-4GlcNAcb1-4GlcNAcb-Sp19                              | 14 | 12 |
| 34  | (3S)Galb1-4(6S)GlcNAcb-Sp0                                                                                                                   | 14 | 17 |
| 114 | Gala1-3Galb1-3GlcNAcb-Sp0                                                                                                                    | 14 | 9  |
| 253 | Neu5Aca2-3Galb1-4(Fuca1-3)GlcNAcb1-3Galb1-4(Fuca1-3)GlcNAcb1-3Galb1-4(Fuca1-3)GlcNAcb-Sp0                                                    | 14 | 4  |
| 141 | Galb1-3GalNAca-Sp16                                                                                                                          | 14 | 9  |
| 321 | Neu5Aca2-8Neu5Acb-Sp17                                                                                                                       | 14 | 2  |
| 178 | GlcNAcb1-6(GlcNAcb1-3)Galb1-4GlcNAcb-Sp8                                                                                                     | 14 | 8  |
| 480 | Neu5Aca2-6Galb1-4GlcNAcb1-6GalNAca-Sp14                                                                                                      | 14 | 10 |
| 113 | Gala1-3Galb1-4(Fuca1-3)GlcNAcb-Sp8                                                                                                           | 14 | 3  |
| 241 | Neu5Aca2-3Galb1-4(Neu5Aca2-3Galb1-3)GlcNAcb-Sp8                                                                                              | 14 | 13 |
| 219 | (3S)Galb1-4(Fuca1-3)(6S)GlcNAcb-Sp8                                                                                                          | 14 | 6  |
| 255 | Neu5Aca2-3Galb1-4(Fuca1-3)GlcNAcb-Sp8                                                                                                        | 14 | 13 |
| 60  | Fuca1-2Galb1-3(Fuca1-4)GlcNAcb-Sp8                                                                                                           | 13 | 13 |
| 435 | Galb1-4GlcNAcb1-2Mana1-6(GlcNAcb1-4)(Galb1-4GlcNAcb1-2Mana1-3)Manb1-4GlcNAcb1-4GlcNAc-Sp21                                                   | 13 | 5  |
| 56  | Neu5Aca2-6Galb1-4GlcNAcb1-2Mana1-6(Neu5Aca2-6Galb1-4GlcNAcb1-2Man-a1-3)Manb1-4GlcNAcb1-4GlcNAcb-Sp21                                         | 13 | 11 |
| 513 | (3S)GalNAcb1-4(3S)GlcNAc-Sp8                                                                                                                 | 13 | 16 |
| 258 | Neu5Aca2-3Galb1-4GlcNAcb1-3Galb1-4GlcNAcb1-3Galb1-4GlcNAcb-Sp0                                                                               | 13 | 2  |
| 28  | (3S)Galb1-3(Fuca1-4)GlcNAcb-Sp8                                                                                                              | 13 | 4  |
| 387 | Galb1-4GlcNAcb1-6(Galb1-4GlcNAcb1-2)Mana1-6(Galb1-4GlcNAcb1-4(Galb1-4GlcNAcb1-2)Mana1-3)Manb1-4GlcNAcb1-4GlcNAcb-Sp21                        | 13 | 7  |
| 369 | Galb1-4GlcNAcb1-2Mana1-6(Galb1-4GlcNAcb1-4(Galb1-4GlcNAcb1-2)Mana1-3)Manb1-4GlcNAcb1-4GlcNAc-Sp21                                            | 13 | 6  |
| 275 | Neu5Aca2-8Neu5Aca-Sp8                                                                                                                        | 13 | 6  |
| 203 | GlcAb1-3Galb-Sp8                                                                                                                             | 13 | 4  |
| 598 | GlcNAcb1-3Galb1-4GlcNAcb1-3Galb1-4GlcNAcb1-3GalNAca-Sp14                                                                                     | 13 | 6  |
| 431 | GlcNAcb1-2Mana1-6(GlcNAcb1-4)(GlcNAcb1-2Mana1-3)Manb1-4GlcNAcb1-4GlcNAc-Sp21                                                                 | 13 | 8  |
| 443 | (6S)Galb1-3GlcNAcb-Sp0                                                                                                                       | 13 | 12 |
| 332 | Neu5Aca2-6Galb1-4GlcNAcb1-3Galb1-4GlcNAcb1-3Galb1-4GlcNAcb-Sp0                                                                               | 13 | 9  |
| 287 | Neu5Gca-Sp8                                                                                                                                  | 13 | 3  |
| 455 | Gala1-3(Fuca1-2)Galb1-3GlcNAcb1-2Mana1-6(Gala1-3(Fuca1-2)Galb1-3GlcNAcb1-2Mana1-3)Manb1-4GlcNAcb1-4(Fuca1-6)GlcNAcb-Sp22                     | 12 | 11 |
| 61  | Fuca1-2Galb1-3GalNAca-Sp8                                                                                                                    | 12 | 7  |
| 384 | Galb1-4GlcNAcb1-6(Fuca1-4(Fuca1-2Galb1-3)GlcNAcb1-3)Galb1-4Glc-Sp21                                                                          | 12 | 3  |
| 261 | Neu5Aca2-3Galb1-4GlcNAcb1-3Galb1-4GlcNAcb-Sp0                                                                                                | 12 | 12 |
| 238 | Neu5Aca2-3Galb1-3(6S)GlcNAc-Sp8                                                                                                              | 12 | 4  |
| 37  | (3S)Galb1-4GlcNAcb-Sp8                                                                                                                       | 12 | 10 |
| 164 | Galb1-4GlcNAcb1-3Galb1-4Glc-Sp0                                                                                                              | 12 | 5  |
| 486 | Neu5Aca2-3Galb1-3GlcNAcb1-2Mana1-6(GlcNAcb1-4)(Neu5Aca2-3Galb1-3GlcNAcb1-2Mana1-3)Manb1-4GlcNAcb1-4GlcNAc-Sp21                               | 12 | 6  |
| 543 | Neu5Gca2-3Galb1-4GlcNAcb1-3Galb1-4GlcNAcb1-2Mana1-6(Neu5Gca2-3Galb1-4GlcNAcb1-3Galb1-4GlcNAcb1-2Mana1-3)Manb1-4GlcNAcb1-4GlcNAcb-Sp24        | 12 | 7  |
| 397 | GlcNAcb1-2Mana1-6(Galb1-4GlcNAcb1-2Mana1-3)Manb1-4GlcNAcb1-4GlcNAc-Sp12                                                                      | 12 | 5  |

|     |                                                                                                               |    |    |
|-----|---------------------------------------------------------------------------------------------------------------|----|----|
| 170 | Galb1-4GlcNAcb-Sp23                                                                                           | 12 | 9  |
| 215 | Mana1-6(Mana1-3)Mana1-6(Mana1-2Mana1-3)Manb1-4GlcNAcb1-4GlcNAcb-Sp12                                          | 12 | 6  |
| 18  | GlcN(Gc)b-Sp8                                                                                                 | 12 | 7  |
| 160 | Galb1-4GlcNAcb1-3GalNAc-Sp14                                                                                  | 12 | 8  |
| 319 | Galb1-4GlcNAcb1-2Mana1-6(Neu5Aca2-6Galb1-4GlcNAcb1-2Mana1-3)Manb1-4GlcNAcb1-4GlcNAcb-Sp12                     | 12 | 7  |
| 529 | Neu5Aca2-3Galb1-3GlcNAcb1-4Galb1-4Glc-Sp0                                                                     | 11 | 3  |
| 256 | Neu5Aca2-3Galb1-4(Fuca1-3)GlcNAcb1-3Galb-Sp8                                                                  | 11 | 7  |
| 211 | Mana1-2Mana1-6(Mana1-3)Mana1-6(Mana1-2Mana1-2Mana1-3)Manb1-4GlcNAcb1-4GlcNAcb-Sp12                            | 11 | 4  |
| 126 | Galb1-3(Fuca1-4)GlcNAcb1-3Galb1-4(Fuca1-3)GlcNAcb-Sp0                                                         | 11 | 6  |
| 101 | Gala1-3(Fuca1-2)Galb1-3GlcNAcb-Sp0                                                                            | 11 | 2  |
| 171 | Galb1-4Glc-Sp0                                                                                                | 11 | 4  |
| 46  | Neu5Aca2-3(6S)Galb1-4GlcNAcb-Sp8                                                                              | 11 | 3  |
| 437 | Galb1-4GlcNAcb1-6(Galb1-4GlcNAcb1-2)Mana1-6(GlcNAcb1-4)(Galb1-4GlcNAcb1-2Mana1-3)Manb1-4GlcNAcb1-4GlcNAc-Sp21 | 11 | 1  |
| 42  | (6S)Galb1-4Glc-Sp0                                                                                            | 11 | 6  |
| 88  | GlcNAcb1-3Galb1-3GalNAca-Sp8                                                                                  | 11 | 6  |
| 573 | Neu5Aca2-8Neu5Aca2-3Galb1-3GalNAcb1-4(Neu5Aca2-3)Galb1-4Glc-Sp21                                              | 11 | 5  |
| 251 | Neu5Aca2-3Galb1-4(6S)GlcNAcb-Sp8                                                                              | 11 | 8  |
| 159 | Galb1-4GlcNAcb1-3GalNAca-Sp8                                                                                  | 11 | 8  |
| 217 | Manb1-4GlcNAcb-Sp0                                                                                            | 11 | 2  |
| 283 | Neu5Gca2-3Galb1-4GlcNAcb-Sp0                                                                                  | 11 | 15 |
| 537 | Gala1-3(Fuca1-2)Galb1-3GalNAcb1-3Gala1-4Galb1-4Glc-Sp21                                                       | 11 | 18 |
| 237 | Neu5Aca2-3GalNAcb1-4GlcNAcb-Sp0                                                                               | 11 | 6  |
| 252 | Neu5Aca2-3Galb1-4(Fuca1-3)(6S)GlcNAcb-Sp8                                                                     | 11 | 8  |
| 44  | (6S)Galb1-4GlcNAcb-Sp8                                                                                        | 11 | 6  |
| 248 | Fuca1-2(6S)Galb1-4Glc-Sp0                                                                                     | 11 | 6  |
| 140 | Galb1-3GalNAca-Sp14                                                                                           | 11 | 16 |
| 389 | Fuca1-2Galb1-3GalNAca1-3(Fuca1-2)Galb1-4Glc-Sp0                                                               | 11 | 7  |
| 148 | Galb1-3GlcNAcb1-3Galb1-4Glc-Sp10                                                                              | 11 | 15 |
| 610 | Galb1-3GalNAcb1-4(Neu5Aca2-8Neu5Aca2-8Neu5Aca2-3)Galb1-4Glc-Sp21                                              | 10 | 13 |
| 298 | (6P)Glc-Sp10                                                                                                  | 10 | 9  |
| 329 | Neu5,9Ac2a2-3Galb1-3GlcNAcb-Sp0                                                                               | 10 | 3  |
| 556 | Neu5Gca2-8Neu5Gca2-6Galb1-4GlcNAc-Sp0                                                                         | 10 | 11 |
| 66  | Fuca1-2Galb1-3GlcNAcb1-3Galb1-4Glc-Sp10                                                                       | 10 | 11 |
| 511 | (6S)(4S)GalNAcb1-4GlcNAc-Sp8                                                                                  | 10 | 9  |
| 272 | Neu5Aca2-6Galb1-4Glc-Sp0                                                                                      | 10 | 17 |
| 9   | Neu5Aca-Sp8                                                                                                   | 10 | 10 |
| 433 | GlcNAcb1-6(GlcNAcb1-2)Mana1-6(GlcNAcb1-4)(GlcNAcb1-2Mana1-3)Manb1-4GlcNAcb1-4GlcNAc-Sp21                      | 10 | 5  |
| 259 | Neu5Aca2-3Galb1-4GlcNAcb-Sp0                                                                                  | 10 | 3  |
| 539 | GlcNAcb1-3Galb1-4GlcNAcb1-2Mana1-6(GlcNAcb1-3Galb1-4GlcNAcb1-2Mana1-3)Manb1-4GlcNAcb1-4GlcNAcb-Sp12           | 10 | 8  |
| 538 | Galb1-3GalNAcb1-3Gal-Sp21                                                                                     | 10 | 8  |
| 181 | GlcNAcb1-3Galb-Sp8                                                                                            | 10 | 3  |
| 177 | GlcNAcb1-6(GlcNAcb1-3)GalNAca-Sp14                                                                            | 10 | 4  |
| 483 | Neu5Aca2-3Galb1-4GlcNAcb1-2Mana1-6(Neu5Aca2-3Galb1-4GlcNAcb1-2Mana1-3)Manb1-4GlcNAcb1-4(Fuca1-6)GlcNAcb-Sp24  | 10 | 5  |
| 180 | GlcNAcb1-3GalNAca-Sp14                                                                                        | 10 | 6  |
| 284 | Neu5Gca2-3Galb1-4Glc-Sp0                                                                                      | 10 | 10 |
| 279 | Neu5Acb2-6Galb1-4GlcNAcb-Sp8                                                                                  | 10 | 7  |
| 499 | Fuca1-2Galb1-4GlcNAcb1-2Mana-Sp0                                                                              | 10 | 4  |
| 185 | GlcNAcb1-3Galb1-4Glc-Sp0                                                                                      | 10 | 2  |
| 469 | Glca1-6Glca1-6Glca1-6Glc-Sp10                                                                                 | 10 | 4  |

|     |                                                                                                                                                                           |   |    |
|-----|---------------------------------------------------------------------------------------------------------------------------------------------------------------------------|---|----|
| 242 | Neu5Aca2-3Galb1-3(6S)GalNAca-Sp8                                                                                                                                          | 9 | 8  |
| 137 | Neu5Acb2-6(Galb1-3)GalNAca-Sp8                                                                                                                                            | 9 | 3  |
| 48  | Neu5,9Ac <sub>2</sub> a-Sp8                                                                                                                                               | 9 | 8  |
| 169 | Galb1-4GlcNAcb-Sp8                                                                                                                                                        | 9 | 2  |
| 343 | GlcNAca1-4Galb1-4GlcNAcb1-3Galb1-4GlcNAcb-Sp0                                                                                                                             | 9 | 8  |
| 386 | Galb1-3GlcNAcb1-3Galb1-4(Fuca1-3)GlcNAcb1-6(Galb1-3GlcNAcb1-3)Galb1-4Glc-Sp21                                                                                             | 9 | 11 |
| 327 | Galb1-4(Fuca1-3)GlcNAcb1-2Mana1-6(Galb1-4(Fuca1-3)GlcNAcb1-2Mana1-3)Manb1-4GlcNAcb1-4GlcNAcb-Sp20                                                                         | 9 | 7  |
| 207 | Mana1-2Mana1-2Mana1-3Mana-Sp9                                                                                                                                             | 9 | 5  |
| 249 | Neu5Aca2-3Galb1-3GlcNAcb-Sp0                                                                                                                                              | 9 | 7  |
| 206 | KDNa2-3Galb1-4GlcNAcb-Sp0                                                                                                                                                 | 9 | 5  |
| 209 | Mana1-2Mana1-3Mana-Sp9                                                                                                                                                    | 9 | 4  |
| 396 | Neu5Aca2-3Galb1-3GlcNAcb1-2Mana1-6(Neu5Aca2-3Galb1-3GlcNAcb1-2Mana1-3)Manb1-4GlcNAcb1-4GlcNAc-Sp19                                                                        | 9 | 12 |
| 348 | Neu5Aca2-6Galb1-4GlcNAcb1-2Mana1-3Manb1-4GlcNAcb1-4GlcNAc-Sp12                                                                                                            | 9 | 2  |
| 234 | Neu5Aca2-3Galb1-3GalNAcb1-4(Neu5Aca2-3)Galb1-4Glc-Sp0                                                                                                                     | 9 | 3  |
| 269 | Neu5Aca2-6Galb1-4GlcNAcb-Sp8                                                                                                                                              | 9 | 11 |
| 507 | GlcNAcb1-6(GlcNAcb1-2)Mana1-6(GlcNAcb1-4)(GlcNAcb1-4(GlcNAcb1-2)Mana1-3)Manb1-4GlcNAcb1-4(Fuca1-6)GlcNAc-Sp21                                                             | 9 | 4  |
| 385 | Galb1-4(Fuca1-3)GlcNAcb1-6(Fuca1-4(Fuca1-2Galb1-3)GlcNAcb1-3)Galb1-4Glc-Sp21                                                                                              | 9 | 4  |
| 268 | Neu5Aca2-6Galb1-4GlcNAcb-Sp0                                                                                                                                              | 9 | 8  |
| 38  | (3S)Galb-Sp8                                                                                                                                                              | 9 | 4  |
| 116 | Gala1-3Galb1-4Glc-Sp0                                                                                                                                                     | 9 | 10 |
| 462 | Neu5Aca2-3Galb1-4GlcNAcb1-6(Neu5Aca2-3Galb1-4GlcNAcb1-2)Mana1-6(GlcNAcb1-4)(Neu5Aca2-3Galb1-4GlcNAcb1-4(Neu5Aca2-3Galb1-4GlcNAcb1-2)Mana1-3)Manb1-4GlcNAcb1-4GlcNAcb-Sp21 | 9 | 5  |
| 372 | Gala1-3Galb1-4(Fuca1-3)GlcNAcb1-2Mana1-6(Gala1-3Galb1-4(Fuca1-3)GlcNAcb1-2Mana1-3)Manb1-4GlcNAcb1-4GlcNAcb-Sp20                                                           | 9 | 7  |
| 357 | KDNa2-6Galb1-4GlcNAc-Sp0                                                                                                                                                  | 9 | 6  |
| 119 | Gala1-4(Fuca1-2)Galb1-4GlcNAcb-Sp8                                                                                                                                        | 9 | 2  |
| 227 | Neu5Aca2-8Neu5Aca2-8Neu5Aca2-3Galb1-4Glc-Sp0                                                                                                                              | 9 | 3  |
| 239 | Neu5Aca2-3Galb1-3(Fuca1-4)GlcNAcb-Sp8                                                                                                                                     | 9 | 10 |
| 246 | Neu5Aca2-3Galb1-3GalNAcb1-3Gala1-4Galb1-4Glc-Sp0                                                                                                                          | 9 | 4  |
| 312 | MurNAcb1-4GlcNAcb-Sp10                                                                                                                                                    | 9 | 3  |
| 81  | Fucb1-3GlcNAcb-Sp8                                                                                                                                                        | 8 | 3  |
| 162 | Galb1-4GlcNAcb1-3Galb1-4GlcNAcb1-3Galb1-4GlcNAcb-Sp0                                                                                                                      | 8 | 6  |
| 49  | Neu5,9Ac <sub>2</sub> a2-6Galb1-4GlcNAcb-Sp8                                                                                                                              | 8 | 6  |
| 84  | (3S)Galb1-4(Fuca1-3)Glc-Sp0                                                                                                                                               | 8 | 5  |
| 280 | Neu5Gca2-3Galb1-3(Fuca1-4)GlcNAcb-Sp0                                                                                                                                     | 8 | 8  |
| 64  | Fuca1-2Galb1-3GalNAcb1-4(Neu5Aca2-3)Galb1-4Glc-Sp9                                                                                                                        | 8 | 8  |
| 325 | Neu5Aca2-3Galb1-4GlcNAcb1-2Mana1-6(Neu5Aca2-3Galb1-4GlcNAcb1-2Mana1-3)Manb1-4GlcNAcb1-4GlcNAcb-Sp12                                                                       | 8 | 6  |
| 297 | (6S)Galb1-4(6S)GlcNAcb-Sp0                                                                                                                                                | 8 | 8  |
| 247 | Neu5Aca2-3Galb1-3GlcNAcb1-3Galb1-4GlcNAcb-Sp0                                                                                                                             | 8 | 3  |
| 102 | Gala1-3(Fuca1-2)Galb1-3GlcNAcb-Sp8                                                                                                                                        | 8 | 7  |
| 570 | (3S)GlcAb1-3Galb1-4GlcNAcb1-2Mana-Sp0                                                                                                                                     | 8 | 1  |
| 487 | Neu5Aca2-6Galb1-4GlcNAcb1-6(Fuca1-2Galb1-4(Fuca1-3)GlcNAcb1-3)Galb1-4Glc-Sp21                                                                                             | 8 | 6  |
| 208 | Mana1-2Mana1-6(Mana1-2Mana1-3)Mana-Sp9                                                                                                                                    | 8 | 8  |
| 526 | Neu5Aca2-3Galb1-3GlcNAcb1-2Mana-Sp0                                                                                                                                       | 8 | 8  |
| 367 | Neu5Aca2-6GlcNAcb1-4GlcNAcb1-4GlcNAc-Sp21                                                                                                                                 | 8 | 5  |
| 311 | GlcNAcb1-4GlcNAcb-Sp12                                                                                                                                                    | 8 | 8  |
| 600 | Neu5Aca2-3Galb1-4GlcNAcb1-3Galb1-4GlcNAcb1-6(Galb1-3)GalNAca-Sp14                                                                                                         | 8 | 9  |
| 361 | Fuca1-2Galb1-4GlcNAcb1-2Mana1-6(Fuca1-2Galb1-4GlcNAcb1-2Mana1-3)Manb1-4GlcNAcb1-4GlcNAcb-Sp20                                                                             | 8 | 9  |
| 112 | Gala1-3GalNAcb-Sp8                                                                                                                                                        | 8 | 4  |
| 349 | Galb1-4GlcNAcb1-2Mana1-3Manb1-4GlcNAcb1-4GlcNAc-Sp12                                                                                                                      | 8 | 7  |
| 355 | (6S)GlcNAcb1-3Galb1-4GlcNAcb-Sp0                                                                                                                                          | 8 | 6  |

|     |                                                                                                                 |   |    |
|-----|-----------------------------------------------------------------------------------------------------------------|---|----|
| 442 | GalNAcb1-6GalNAcb-Sp8                                                                                           | 8 | 5  |
| 260 | Neu5Aca2-3Galb1-4GlcNAcb-Sp8                                                                                    | 8 | 4  |
| 163 | Galb1-4GlcNAcb1-3Galb1-4GlcNAcb-Sp0                                                                             | 8 | 8  |
| 30  | (3S)Galb1-3GlcNAcb-Sp0                                                                                          | 7 | 24 |
| 196 | Glca1-4Glca-Sp8                                                                                                 | 7 | 4  |
| 432 | GlcNAcb1-2Mana1-6(GlcNAcb1-4)(GlcNAcb1-4(GlcNAcb1-2)Mana1-3)Manb1-4GlcNAcb1-4GlcNAc-Sp21                        | 7 | 7  |
| 515 | (3S)GalNAcb1-4GlcNAc-Sp8                                                                                        | 7 | 3  |
| 243 | Neu5Aca2-6(Neu5Aca2-3Galb1-3)GalNAca-Sp8                                                                        | 7 | 5  |
| 440 | Galb1-6Galb-Sp10                                                                                                | 7 | 14 |
| 492 | (3S)Galb1-3(Fuca1-4)GlcNAcb-Sp0                                                                                 | 7 | 9  |
| 360 | Fuca1-2Galb1-3GlcNAcb1-2Mana1-6(Fuca1-2Galb1-3GlcNAcb1-2Mana1-3)Manb1-4GlcNAcb1-4GlcNAcb-Sp20                   | 7 | 3  |
| 22  | 6S(3S)Galb1-4(6S)GlcNAcb-Sp0                                                                                    | 7 | 12 |
| 391 | Galb1-3GlcNAcb1-3GalNAca-Sp14                                                                                   | 7 | 6  |
| 323 | Neu5Gcb2-6Galb1-4GlcNAc-Sp8                                                                                     | 7 | 5  |
| 250 | Neu5Aca2-3Galb1-3GlcNAcb-Sp8                                                                                    | 7 | 6  |
| 313 | Mana1-6Manb-Sp10                                                                                                | 7 | 11 |
| 200 | G-ol-Sp8                                                                                                        | 7 | 7  |
| 344 | GlcNAca1-4Galb1-3GalNAc-Sp14                                                                                    | 6 | 6  |
| 105 | Gala1-3(Fuca1-2)Galb1-4GlcNAc-Sp0                                                                               | 6 | 5  |
| 569 | (3S)GlcAb1-3Galb1-4GlcNAcb1-3Galb1-4Glc-Sp0                                                                     | 6 | 3  |
| 463 | Neu5Aca2-6Galb1-4GlcNAcb1-2Mana1-6(GlcNAcb1-4)(Neu5Aca2-6Galb1-4GlcNAcb1-2Mana1-3)Manb1-4GlcNAcb1-4GlcNAcb-Sp21 | 6 | 4  |
| 293 | Galb1-4GlcNAcb1-3Galb1-3GlcNAcb-Sp0                                                                             | 6 | 7  |
| 149 | Galb1-3GlcNAcb-Sp0                                                                                              | 6 | 5  |
| 68  | Fuca1-2Galb1-3GlcNAcb-Sp8                                                                                       | 6 | 9  |
| 509 | Galb1-3GlcNAca1-3Galb1-4GlcNAcb-Sp8                                                                             | 6 | 2  |
| 310 | GlcNAcb1-4GlcNAcb-Sp10                                                                                          | 6 | 8  |
| 423 | Gala1-3(Fuca1-2)Galb1-3GlcNAcb1-3GalNAc-Sp14                                                                    | 6 | 6  |
| 154 | Galb1-4(Fuca1-3)GlcNAcb1-3Galb1-4(Fuca1-3)GlcNAcb1-3Galb1-4(Fuca1-3)GlcNAcb-Sp0                                 | 6 | 5  |
| 292 | Galb1-4(Fuca1-3)GlcNAcb1-3Galb1-3(Fuca1-4)GlcNAcb-Sp0                                                           | 6 | 2  |
| 459 | Neu5Aca2-3Galb1-4GlcNAcb1-2Mana1-6(GlcNAcb1-4)(Neu5Aca2-3Galb1-4GlcNAcb1-2Mana1-3)Manb1-4GlcNAcb1-4GlcNAcb-Sp21 | 6 | 5  |
| 409 | Gala1-3(Fuca1-2)Galb1-4(Fuca1-3)Glc-Sp21                                                                        | 6 | 14 |
| 274 | Neu5Aca2-6Galb-Sp8                                                                                              | 6 | 4  |
| 602 | Neu5Aca2-6Galb1-4GlcNAcb1-6(Galb1-3)GalNAca-Sp14                                                                | 5 | 13 |
| 218 | Neu5Aca2-3Galb1-4GlcNAcb1-3Galb1-4(Fuca1-3)GlcNAcb-Sp0                                                          | 5 | 8  |
| 267 | Neu5Aca2-6Galb1-4(6S)GlcNAcb-Sp8                                                                                | 5 | 2  |
| 354 | Galb1-3GlcNAcb1-2Mana1-6(Galb1-3GlcNAcb1-2Mana1-3)Manb1-4GlcNAcb1-4(Fuca1-6)GlcNAcb-Sp22                        | 5 | 15 |
| 314 | Mana1-6(Mana1-3)Mana1-6(Mana1-3)Manb-Sp10                                                                       | 5 | 2  |
| 430 | Fuca1-3GlcNAcb1-6(Galb1-4GlcNAcb1-3)Galb1-4Glc-Sp21                                                             | 5 | 4  |
| 302 | Galb1-4GlcNAcb1-6(Galb1-4GlcNAcb1-3)Galb1-4GlcNAc-Sp0                                                           | 5 | 6  |
| 117 | Gala1-3Galb1-4Glc-Sp10                                                                                          | 5 | 8  |
| 72  | Fuca1-2Galb1-4(Fuca1-3)GlcNAcb-Sp8                                                                              | 5 | 8  |
| 330 | Neu5Aca2-6Galb1-4GlcNAcb1-3Galb1-3GlcNAcb-Sp0                                                                   | 5 | 9  |
| 281 | Neu5Gca2-3Galb1-3GlcNAcb-Sp0                                                                                    | 5 | 7  |
| 124 | Gala1-6Glc-Sp8                                                                                                  | 5 | 8  |
| 222 | Fuca1-2(6S)Galb1-4(6S)Glc-Sp0                                                                                   | 5 | 8  |
| 510 | Galb1-3(6S)GlcNAcb-Sp8                                                                                          | 5 | 6  |
| 125 | Galb1-2Galb-Sp8                                                                                                 | 5 | 8  |
| 328 | Neu5,9Ac2a2-3Galb1-4GlcNAcb-Sp0                                                                                 | 5 | 7  |
| 51  | Mana1-6(Mana1-3)Manb1-4GlcNAcb1-4GlcNAcb-Sp13                                                                   | 5 | 13 |

|     |                                                                                                                                              |    |    |
|-----|----------------------------------------------------------------------------------------------------------------------------------------------|----|----|
| 35  | (3S)Galb1-4(6S)GlcNAcb-Sp8                                                                                                                   | 5  | 2  |
| 436 | Galb1-4GlcNAcb1-2Mana1-6(GlcNAcb1-4)(Galb1-4GlcNAcb1-4(Galb1-4GlcNAcb1-2)Mana1-3)Manb1-4GlcNAcb1-4GlcNAc-Sp21                                | 5  | 2  |
| 157 | Galb1-4GalNAca1-3(Fuca1-2)Galb1-4GlcNAcb-Sp8                                                                                                 | 4  | 3  |
| 410 | Galb1-4GlcNAcb1-6(Neu5Aca2-6Galb1-3GlcNAcb1-3)Galb1-4Glc-Sp21                                                                                | 4  | 1  |
| 399 | Neu5Aca2-3Galb1-3GlcNAcb1-3GalNAca-Sp14                                                                                                      | 4  | 7  |
| 338 | GlcNAca1-4Galb1-4GlcNAcb1-3Galb1-4GlcNAcb1-3Galb1-4GlcNAcb-Sp0                                                                               | 4  | 2  |
| 458 | Galb1-4GlcNAcb1-6(Galb1-4GlcNAcb1-2)Mana1-6(Galb1-4GlcNAcb1-2Mana1-3)Manb1-4GlcNAcb1-4GlcNAcb-Sp19                                           | 4  | 3  |
| 155 | Galb1-4(6S)Glc-Sp0                                                                                                                           | 4  | 6  |
| 359 | KDNa2-3Galb1-3GalNAca-Sp14                                                                                                                   | 4  | 5  |
| 535 | GlcNAcb1-3Galb1-4GlcNAcb1-6(GlcNAcb1-3)Galb1-4GlcNAc-Sp0                                                                                     | 4  | 7  |
| 216 | Mana1-6(Mana1-3)Mana1-6(Mana1-3)Manb1-4GlcNAcb1-4GlcNAcb-Sp12                                                                                | 4  | 4  |
| 230 | Neu5Aca2-3(6S)Galb1-4(Fuca1-3)GlcNAcb-Sp8                                                                                                    | 4  | 5  |
| 498 | Gala1-3(Fuca1-2)Galb1-4GlcNAcb1-6GalNAca-Sp14                                                                                                | 4  | 6  |
| 2   | Glca-Sp8                                                                                                                                     | 4  | 5  |
| 303 | GlcNAcb1-6(Galb1-4GlcNAcb1-3)Galb1-4GlcNAc-Sp0                                                                                               | 3  | 11 |
| 341 | GlcNAca1-4Galb1-4GlcNAcb1-3Galb1-4Glc-Sp0                                                                                                    | 3  | 2  |
| 186 | GlcNAcb1-4-MDPLys                                                                                                                            | 3  | 5  |
| 115 | Gala1-3Galb1-4GlcNAcb-Sp8                                                                                                                    | 3  | 3  |
| 245 | Neu5Aca2-3Galb-Sp8                                                                                                                           | 3  | 3  |
| 363 | Gala1-3Galb1-4GlcNAcb1-2Mana1-6(Gala1-3Galb1-4GlcNAcb1-2Mana1-3)Manb1-4GlcNAcb1-4GlcNAcb-Sp20                                                | 3  | 3  |
| 14  | Manb-Sp8                                                                                                                                     | 3  | 6  |
| 317 | Neu5Aca2-3Galb1-4GlcNAcb1-6(Neu5Aca2-3Galb1-3)GalNAca-Sp14                                                                                   | 3  | 2  |
| 388 | GlcNAcb1-2Mana1-6(GlcNAcb1-4(GlcNAcb1-2)Mana1-3)Manb1-4GlcNAcb1-4GlcNAc-Sp21                                                                 | 3  | 4  |
| 128 | Galb1-3(Fuca1-4)GlcNAc-Sp0                                                                                                                   | 3  | 1  |
| 534 | Neu5Aca2-3Galb1-4(Fuca1-3)GlcNAcb1-2Mana-Sp0                                                                                                 | 3  | 2  |
| 161 | Galb1-4GlcNAcb1-3Galb1-4(Fuca1-3)GlcNAcb1-3Galb1-4(Fuca1-3)GlcNAcb-Sp0                                                                       | 3  | 4  |
| 460 | Neu5Aca2-3Galb1-4GlcNAcb1-4Mana1-6(GlcNAcb1-4)(Neu5Aca2-3Galb1-4GlcNAcb1-4(Neu5Aca2-3Galb1-4GlcNAcb1-2)Mana1-3)Manb1-4GlcNAcb1-4GlcNAcb-Sp21 | 3  | 2  |
| 150 | Galb1-3GlcNAcb-Sp8                                                                                                                           | 3  | 6  |
| 412 | Neu5Aca2-3Galb1-3GalNAcb1-4(Neu5Aca2-8Neu5Aca2-3)Galb1-4Glc-Sp0                                                                              | 3  | 7  |
| 557 | Neu5Aca2-8Neu5Aca2-3Galb1-4GlcNAc-Sp0                                                                                                        | 2  | 8  |
| 50  | Mana1-6(Mana1-3)Manb1-4GlcNAcb1-4GlcNAcb-Sp12                                                                                                | 2  | 4  |
| 555 | Neu5Gca2-8Neu5Gca2-3Galb1-4GlcNAcb1-3Galb1-4GlcNAc-Sp0                                                                                       | 2  | 11 |
| 333 | Gala1-4Galb1-4GlcNAcb1-3Galb1-4Glc-Sp0                                                                                                       | 2  | 8  |
| 223 | Neu5Aca2-3Galb1-3GalNAca-Sp8                                                                                                                 | 2  | 5  |
| 184 | GlcNAcb1-3Galb1-4GlcNAcb1-3Galb1-4GlcNAcb-Sp0                                                                                                | 2  | 2  |
| 315 | Mana1-2Mana1-6(Mana1-3)Mana1-6(Mana1-2Mana1-2Mana1-3)Mana-Sp9                                                                                | 2  | 7  |
| 422 | Fuca1-2Galb1-3GlcNAcb1-3GalNAc-Sp14                                                                                                          | 1  | 6  |
| 75  | Fuca1-2Galb1-4GlcNAcb-Sp0                                                                                                                    | 1  | 2  |
| 294 | Neu5Aca2-3Galb1-3GlcNAcb1-3Galb1-3GlcNAcb-Sp0                                                                                                | 1  | 4  |
| 497 | Fuca1-2(6S)Galb1-3GlcNAcb-Sp0                                                                                                                | 1  | 1  |
| 198 | Glc1-4Glc-Sp8                                                                                                                                | 0  | 6  |
| 518 | (6P)Galb1-4GlcNAcb-Sp0                                                                                                                       | 0  | 4  |
| 316 | Mana1-2Mana1-6(Mana1-2Mana1-3)Mana1-6(Mana1-2Mana1-2Mana1-3)Mana-Sp9                                                                         | -1 | 2  |
| 100 | Gala1-2Galb-Sp8                                                                                                                              | -1 | 4  |
| 340 | GlcNAca1-4Galb1-3GlcNAcb-Sp0                                                                                                                 | -1 | 3  |
| 17  | GlcNAcb-Sp8                                                                                                                                  | -1 | 2  |
| 521 | Gala1-3Galb1-4GlcNAcb1-2Mana-Sp0                                                                                                             | -1 | 10 |
| 65  | Fuca1-2Galb1-3GlcNAcb1-3Galb1-4Glc-Sp8                                                                                                       | -2 | 8  |
| 191 | GlcNAcb1-4GlcNAcb1-4GlcNAcb-Sp8                                                                                                              | -2 | 6  |

|     |                                                                                                                                                                           |       |     |
|-----|---------------------------------------------------------------------------------------------------------------------------------------------------------------------------|-------|-----|
| 445 | Fuca1-2Galb1-4 GlcNAcb1-2Mana1-6(Fuca1-2Galb1-4GlcNAcb1-2(Fuca1-2Galb1-4GlcNAcb1-4)Mana1-3)Manb1-4GlcNAcb1-4GlcNAcb-Sp12                                                  | -2    | 8   |
| 273 | Neu5Aca2-6Galb1-4Glc-Sp8                                                                                                                                                  | -2    | 6   |
| 41  | (6P)Mana-Sp8                                                                                                                                                              | -3    | 6   |
| 553 | Neu5Aca2-8Neu5Gca2-3Galb1-4GlcNAc-Sp0                                                                                                                                     | -4    | 6   |
| 339 | GlcNAca1-4Galb1-4GlcNAcb-Sp0                                                                                                                                              | -6    | 13  |
| 138 | Neu5Aca2-6(Galb1-3)GlcNAcb1-4Galb1-4Glc-Sp10                                                                                                                              | -6    | 2   |
| 604 | GlcNAcb1-6(Neu5Aca2-3Galb1-3)GalNAca-Sp14                                                                                                                                 | -7    | 16  |
| 19  | Galb1-4GlcNAcb1-6(Galb1-4GlcNAcb1-3)GalNAca-Sp8                                                                                                                           | -7    | 10  |
| 532 | Galb1-4GlcNAcb1-2 Mana1-6(Galb1-4GlcNAcb1-4)(Galb1-4GlcNAcb1-2Mana1-3)Manb1-4GlcNAcb1-4(Fuca1-6)GlcNAc-Sp21                                                               | -7    | 3   |
| 204 | GlcAb1-6Galb-Sp8                                                                                                                                                          | -7    | 15  |
| 197 | GlcA1-6GlcA1-6Glc-Sp8                                                                                                                                                     | -8    | 25  |
| 439 | Galb1-4Galb-Sp10                                                                                                                                                          | -8    | 5   |
| 183 | GlcNAcb1-3Galb1-4GlcNAcb-Sp8                                                                                                                                              | -11   | 10  |
| 146 | Galb1-3Galb-Sp8                                                                                                                                                           | -12   | 5   |
| 221 | Fuca1-2Galb1-4(6S)GlcNAcb-Sp8                                                                                                                                             | -12   | 32  |
| 438 | Galb1-4GlcNAcb1-6(Galb1-4GlcNAcb1-2)Mana1-6(GlcNAcb1-4)(Galb1-4GlcNAcb1-4(Galb1-4GlcNAcb1-2)Mana1-3)Manb1-4GlcNAcb1-4GlcNAc-Sp21                                          | -16   | 3   |
| 471 | Neu5Aca2-3Galb1-4GlcNAcb1-6(Neu5Aca2-3Galb1-4GlcNAcb1-3)GalNAca-Sp14                                                                                                      | -16   | 8   |
| 599 | Galb1-4GlcNAcb1-3Galb1-3GalNAca-Sp14                                                                                                                                      | -17   | 14  |
| 264 | Neu5Aca2-3Galb1-4Glc-Sp8                                                                                                                                                  | -21   | 47  |
| 147 | Galb1-3GlcNAcb1-3Galb1-4GlcNAcb-Sp0                                                                                                                                       | -29   | 8   |
| 593 | GlcNAcb1-3Galb1-4GlcNAcb1-3GalNAca-Sp14                                                                                                                                   | -31   | 39  |
| 531 | Galb1-4GlcNAcb1-2 Mana1-6(GlcNAcb1-4)(Galb1-4GlcNAcb1-2Mana1-3)Manb1-4GlcNAcb1-4(Fuca1-6)GlcNAc-Sp21                                                                      | -32   | 41  |
| 520 | Neu5Aca2-6Galb1-4GlcNAcb1-2Man-Sp0                                                                                                                                        | -38   | 6   |
| 589 | Galb1-4GlcNAcb1-3Galb1-4GlcNAcb1-3GalNAca-Sp14                                                                                                                            | -38   | 39  |
| 603 | Neu5Aca2-3Galb1-4GlcNAcb1-3Galb1-4GlcNAcb1-2Mana1-6(Neu5Aca2-3Galb1-4GlcNAcb1-3Galb1-4GlcNAcb1-2Mana1-3)Manb1-4GlcNAcb1-4GlcNAcb-Sp12                                     | -42   | 31  |
| 595 | GlcNAcb1-3Galb1-4GlcNAcb1-6(GlcNAcb1-3Galb1-4GlcNAcb1-3)GalNAca-Sp14                                                                                                      | -43   | 49  |
| 444 | (6S)Galb1-3(6S)GlcNAc-Sp0                                                                                                                                                 | -44   | 32  |
| 441 | Neu5Aca2-3Galb1-4GlcNAcb1-3Galb-Sp8                                                                                                                                       | -46   | 20  |
| 346 | Mana1-6(Neu5Aca2-6Galb1-4GlcNAcb1-2Mana1-3)Manb1-4GlcNAcb1-4GlcNAc-Sp12                                                                                                   | -48   | 23  |
| 54  | Galb1-4GlcNAcb1-2Mana1-6(Galb1-4GlcNAcb1-2Mana1-3)Manb1-4GlcNAcb1-4GlcNAcb-Sp12                                                                                           | -61   | 92  |
| 596 | Neu5Aca2-3Galb1-4GlcNAcb1-3Galb1-4GlcNAcb1-6(Neu5Aca2-3Galb1-4GlcNAcb1-3Galb1-4GlcNAcb1-3)GalNAca-Sp14                                                                    | -68   | 24  |
| 597 | Neu5Aca2-6Galb1-4GlcNAcb1-3Galb1-4GlcNAcb1-3GalNAca-Sp14                                                                                                                  | -107  | 14  |
| 31  | (3S)Galb1-3GlcNAcb-Sp8                                                                                                                                                    | -160  | 53  |
| 103 | Gala1-3(Fuca1-2)Galb1-4(Fuca1-3)GlcNAcb-Sp0                                                                                                                               | -193  | 109 |
| 182 | GlcNAcb1-3Galb1-4GlcNAcb-Sp0                                                                                                                                              | -220  | 70  |
| 464 | Neu5Aca2-6Galb1-4GlcNAcb1-4Mana1-6(GlcNAcb1-4)(Neu5Aca2-6Galb1-4GlcNAcb1-4(Neu5Aca2-6Galb1-4GlcNAcb1-2)Mana1-3)Manb1-4GlcNAcb1-4GlcNAcb-Sp21                              | -276  | 318 |
| 21  | GlcNAcb1-6(GlcNAcb1-4)(GlcNAcb1-3)GlcNAc-Sp8                                                                                                                              | -857  | 341 |
| 466 | Neu5Aca2-6Galb1-4GlcNAcb1-6(Neu5Aca2-6Galb1-4GlcNAcb1-2)Mana1-6(GlcNAcb1-4)(Neu5Aca2-6Galb1-4GlcNAcb1-4(Neu5Aca2-6Galb1-4GlcNAcb1-2)Mana1-3)Manb1-4GlcNAcb1-4GlcNAcb-Sp21 | -1758 | 92  |

**Supplemental Table 2. Bacterial O-specific polysaccharides on pathogen glycan array from the Consortium for Functional Glycomics**

ID numbers correspond to entries in the Bacterial Carbohydrate Structure DataBase ([www.glyco.ac.ru/bcsdb3](http://www.glyco.ac.ru/bcsdb3)).

| Array | Bacterial strain                                          | ID             | Polysaccharide structure                                                                                                                       |
|-------|-----------------------------------------------------------|----------------|------------------------------------------------------------------------------------------------------------------------------------------------|
| 1     | <i>Escherichia coli</i> O29                               | 20208          | a-D-Glcp- (1-6) -a-D-Galp- (1-3) -+<br> <br>-3) -D-Gro- (1-P-6) -b-D-Glcp- (1-4) -a-L-FucpNAc- (1-3) -b-D-GlcpNAc- (1-                         |
| 2     | <i>Escherichia coli</i> O40                               | 21403<br>23075 | -2) -b-D-Galp- (1-4) -b-D-Manp- (1-4) -a-D-Galp- (1-3) -b-D-GlcpNAc- (1-                                                                       |
| 3     | <i>Escherichia coli</i> O106                              | 20655<br>21694 | a-D-Glcp- (1-4) -+<br> <br>-6) -a-D-Manp- (1-2) -a-D-Manp- (1-2) -b-D-Manp- (1-3) -a-D-GlcpNAc- (1-                                            |
| 4     | <i>Escherichia coli</i> O130                              | 21749          | Gro- (2-P-4) -b-D-GalpNAc- (1-3) -+<br> <br>-4) -a-D-Galp- (1-6) -b-D-Glcp- (1-3) -b-D-GalpNAc- (1-                                            |
| 5     | <i>Escherichia coli</i> O148                              | 21578<br>23062 | -3) -a-L-Rhap- (1-3) -a-L-Rhap- (1-2) -a-D-Glcp- (1-3) -a-D-GlcpNAc- (1-                                                                       |
| 6     | <i>Escherichia coli</i> O150:H6                           | 23079<br>21743 | S-lac- (2-4) -+<br> <br>-3) -b-D-GlcpNAc- (1-2) -a-L-Rhap- (1-2) -a-L-Rhap- (1-3) -a-L-Rhap- (1-3) -b-D-GlcpNAc- (1-<br>b-D-Glcp- (1-2) -+<br> |
| 7     | <i>Escherichia coli</i> O180/C3                           | 10174          | 2) -b-D-Quip3NAc- (1-3) -b-D-Ribf- (1-4) -b-D-Galp- (1-3) -a-D-GalpNAc- (1-                                                                    |
| 8     | <i>Proteus mirabilis</i> 3a, O3c                          | 4700           | L-Lys- (2-6) -a-D-GalpA- (1-4) -+<br> <br>-6) -b-D-GalpNAc- (1-4) -b-D-GlcpA- (1-3) -b-D-GalpNAc- (1-                                          |
| 9     | <i>Proteus mirabilis</i> O8<br><i>Proteus vulgaris</i> O8 | 4030           | a-D-Galp- (1-3) -+<br> <br>-3) -b-D-GlcpA- (1-4) -a-L-FucpNAc- (1-3) -a-D-GlcpNAc- (1-                                                         |



|    |                                                   |       |                                                                                                                          |
|----|---------------------------------------------------|-------|--------------------------------------------------------------------------------------------------------------------------|
| 10 | <i>Proteus mirabilis</i> O10                      | 4664  | a-L-AltpA- (1-3) ++<br> <br>-4) -a-D-GalpNAC- (1-3) -a-D-GalpA- (1-3) -a-D-GlcpNAC- (1-                                  |
| 11 | <i>Proteus mirabilis</i> O29a,29b                 | 10129 | a-D-GalpNAC- (1-3) ++ a-D-Glcp- (1-2) ++<br>   <br>-6) -b-D-GalpNAC- (1-4) -b-D-GlcpA- (1-3) -b-D-GalpNAC- (1-           |
| 12 | <i>Proteus mirabilis</i> O50                      | 2850  | b-D-Glcp- (1-4) ++<br> <br>-3) -b-D-GlcpA- (1-4) -b-D-GalpNAC- (1-4) -b-D-Galp- (1-3) -b-D-GlcpNAC- (1-                  |
| 13 | <i>Proteus mirabilis</i><br>O54a, 54b             | 20237 | D-Gro- (1-P-4) ++<br> <br>-6) -a-D-GlcpNAC- (1-3) -b-D-Galp- (1-3) -a-D-GalpNAC- (1-                                     |
| 14 | <i>Providencia alcalifaciens</i><br>O5            | 5945  | -4) -b-D-Quip3NAC- (1-3) -a-D-Galp- (1-3) -b-D-Galp- (1-3) -b-D-GlcpNAC- (1-                                             |
| 15 | <i>Providencia alcalifaciens</i><br>O19           | 9276  | -2) -b-D-Fucp3NAC4Ac- (1-3) -a-D-GlcpNAC- (1-4) -a-D-Galp- (1-4) -b-D-Galp- (1-3) -b-D-GlcpNAC- (1-                      |
| 16 | <i>Providencia alcalifaciens</i><br>O21           | 2840  | a-D-Fucp3NFo- (1-4) ++<br> <br>-3) -a-D-GalpA- (1-4) -a-D-GalpNAC- (1-4) -a-D-GalpNAC- (1-3) -b-D-GalpNAC- (1-           |
| 17 | <i>Providencia rustigianni</i><br>O14             | 2841  | (2S, 8S) -cetLys- (2-6) ++<br> <br>-3) -a-D-GalpA- (1-4) -a-D-GalpNAC- (1-3) -a-D-GlcpNAC- (1-                           |
| 18 | <i>Providencia stuartii</i><br>O18                | 10467 | -4) -b-D-Quip3NAC- (1-6) -a-D-GlcpNAC- (1-4) -b-D-GlcpA- (1-3) -a-D-GalpNAC- (1-                                         |
| 19 | <i>Providencia stuartii</i><br>O44                | 10079 | b-D-GlcpA- (1-4) ++<br> <br>-4) -a-D-GalpNAC- (1-3) -a-L-Fucp- (1-3) -a-D-Glcp- (1-4) -a-L-Quip- (1-3) -a-D-GlcpNAC- (1- |
| 20 | <i>Pseudomonas aeruginosa</i><br>O1 (IATS 1, FI4) | 20553 | -4) -a-D-GalpNAC- (1-4) -b-D-GlcpNAC3NAC- (1-3) -a-D-FucpNAC- (1-3) -a-D-QuipNAC- (1-                                    |

|    |                                                         |        |                                                                                                                      |
|----|---------------------------------------------------------|--------|----------------------------------------------------------------------------------------------------------------------|
| 21 | <i>Pseudomonas aeruginosa</i><br>O2 (IATS 18, FI7)      | 20560  | -4) -a-L-GulpNAc3NAmA- (1-4) -b-D-ManpNAc3NAcA- (1-3) -a-D-FucpNAc- (1-                                              |
| 22 | <i>Pseudomonas aeruginosa</i><br>O2a,2b (IATS 16)       | 20554  | -4) -b-D-ManpNAc3NAmA- (1-4) -b-D-ManpNAc3NAcA- (1-3) -b-D-FucpNAc- (1-                                              |
| 23 | <i>Pseudomonas aeruginosa</i><br>O2a,2b,2e              | 20555  | -4) -b-D-ManpNAc3NAmA- (1-4) -b-D-ManpNAc3NAcA- (1-3) -b-D-FucpNAc4Ac- (1-                                           |
| 24 | <i>Pseudomonas aeruginosa</i><br>O2a,(2c) (IATS 2, FI3) | 20556  | -4) -b-D-ManpNAc3NAmA- (1-4) -b-L-GulpNAc3NAcA- (1-3) -a-D-FucpNAc- (1-                                              |
| 25 | <i>Pseudomonas aeruginosa</i><br>O2a,2d                 | 20557  | -4) -b-D-ManpNAc3NAmA- (1-4) -b-D-ManpNAc3NAcA- (1-3) -a-D-FucpNAc- (1-                                              |
| 26 | <i>Pseudomonas aeruginosa</i><br>O3a,3b                 | 20561  | (S) -3HOBu- (1-4) -+<br> <br>-2) -a-L-Rhap3Ac- (1-6) -a-D-GlcpNAc- (1-4) -a-L-GalpNAcA- (1-3) -b-D-QuipNAc4N- (1-    |
| 27 | <i>Pseudomonas aeruginosa</i><br>O3a,3b,3c (IATS 3)     | 122939 | (S) -3HOBu- (1-4) -+<br> <br>-2) -a-L-Rhap3Ac- (1-6) -a-D-GlcpNAc- (1-4) -a-L-GalpNAcA3Ac- (1-3) -b-D-QuipNAc4N- (1- |
| 28 | <i>Pseudomonas aeruginosa</i><br>O3a,3d                 | 20563  | -3) -a-L-Rhap- (1-6) -a-D-GlcpNAc- (1-4) -a-L-GalpNAcA- (1-3) -b-D-QuipNAc4NAc- (1-                                  |
| 29 | <i>Pseudomonas aeruginosa</i><br>O4a,4c                 | 20565  | -2) -a-L-Rhap- (1-3) -a-L-FucpNAc- (1-3) -a-L-FucpNAc- (1-3) -a-D-FucpNAc- (1-                                       |
| 30 | <i>Pseudomonas aeruginosa</i><br>O6 (FI1)               | 20570  | -2) -a-L-Rhap- (1-4) -a-D-GalpNAcA3Ac- (1-4) -a-D-GalpNFoA- (1-3) -a-D-QuipNAc- (1-                                  |
| 31 | <i>Pseudomonas aeruginosa</i><br>O6a (IATS 6)           | 20566  | -3) -a-L-Rhap- (1-4) -a-D-GalpNAcA3Ac- (1-4) -a-D-GalpNFoA- (1-3) -a-D-QuipNAc- (1-                                  |
| 32 | <i>Pseudomonas aeruginosa</i><br>O6a,6c                 | 20568  | -3) -a-L-Rhap- (1-4) -a-D-GalpNAcA- (1-4) -a-D-GalpNFoA- (1-3) -a-D-QuipNAc- (1-                                     |
| 33 | <i>Pseudomonas aeruginosa</i><br>O13a,13b (IATS 13)     | 123031 | -2) -a-L-Rhap- (1-3) -a-L-Rhap- (1-4) -a-D-GalpNAcA3Ac- (1-3) -b-D-QuipNAc- (1-                                      |

|    |                                                     |        |                                                                                                                       |
|----|-----------------------------------------------------|--------|-----------------------------------------------------------------------------------------------------------------------|
| 34 | <i>Pseudomonas aeruginosa</i><br>O10a,10b (IATS 10) | 20576  | -3) -a-L-Rhap2Ac- (1-4) -a-L-GalpNAcA- (1-3) -a-D-QuipNAc- (1-                                                        |
| 35 | <i>Pseudomonas aeruginosa</i><br>O10a,10c (IATS 19) | 20577  | -3) -a-L-Rhap- (1-4) -a-L-GalpNAcA- (1-3) -a-D-QuipNAc- (1-                                                           |
| 36 | <i>Pseudomonas aeruginosa</i><br>O11a,11b (IATS 11) | 20578  | -2) -b-L-Glcp- (1-3) -a-L-FucpNAc- (1-3) -b-D-FucpNAc- (1-                                                            |
| 37 | <i>Pseudomonas aeruginosa</i><br>O12 (IATS 12)      | 20579  | -8) -a-8eLegp5Ac7Ac- (2-3) -a-L-FucpNAc- (1-3) -a-D-QuipNAc- (1-                                                      |
| 38 | <i>Pseudomonas aeruginosa</i><br>O13a,13b (IATS 13) | 20580  | -2) -a-L-Rhap- (1-3) -a-L-Rhap- (1-4) -a-D-GalpNAc3AcA- (1-3) -b-D-QuipNAc- (1-                                       |
| 39 | <i>Pseudomonas aeruginosa</i><br>O13a,13c (IATS 14) | 20581  | a-D-Glcp- (1-3) ++<br> <br>-2) -a-L-Rhap- (1-3) -a-L-Rhap- (1-4) -a-D-GalpNAcA- (1-3) -b-D-QuipNAc- (1-               |
| 40 | <i>Pseudomonas aeruginosa</i><br>O14 (IATS 17)      | 20582  | -4) -a-L-Rhap- (1-3) -b-D-ManpNAc- (1-                                                                                |
| 41 | <i>Pseudomonas aeruginosa</i><br>O15 (IATS 15)      | 20583  | -2) -b-D-Ribf- (1-3) -a-D-GalpNAc- (1-                                                                                |
| 42 | <i>Shigella boydii</i><br>type 2                    | 114007 | b-D-Galf- (1-3) ++<br> <br>-2) -a-L-Rhap- (1-2) -a-L-Rhap- (1-2) -b-D-Ribf- (1-4) -a-D-GalpA- (1-3) -a-D-GlcpNAc- (1- |
| 43 | <i>Shigella boydii</i><br>type 4                    | 108649 | a-D-Glcp- (1-2) ++<br> <br>-3) -a-L-Rhap- (1-4) -b-D-GlcpA- (1-3) -b-L-Rhap- (1-4) -b-D-GlcpNAc- (1-                  |
| 44 | <i>Shigella boydii</i><br>type 10                   | 10148  | b-D-Ribf- (1-4) -b-D-GlcpA- (1-4) ++<br> <br>-3) -a-D-Galp- (1-6) -a-D-Manp- (1-2) -a-D-Manp- (1-3) -b-D-GalpNAc- (1- |

|    |                                        |        |                                                                                                                                      |
|----|----------------------------------------|--------|--------------------------------------------------------------------------------------------------------------------------------------|
| 45 | <i>Shigella dysenteriae</i><br>type 3  | 20016  | (R) -lac- (2-4) -b-D-Glcp- (1-6) -a-D-Glcp- (1-4) -+<br> <br>-3) -b-D-Galp- (1-6) -b-D-Galf- (1-3) -b-D-GalpNac- (1-                 |
| 46 | <i>Shigella dysenteriae</i><br>type 8  | 108662 | b-D-GlcpNac- (1-4) -b-D-Glcp- (1-4) -+<br> <br>-4) -b-D-GlcpA- (1-3) -b-D-GalpNac- (1-3) -b-D-GalpNac- (1-                           |
| 47 | <i>Shigella dysenteriae</i><br>type 11 | 23077  | a-D-Glcp- (1-6) -a-D-Galp- (2-Ac ~25%) - (1-3) -+<br> <br>-3) -D-Gro- (3-P-6) -b-D-Glcp- (1-4) -a-L-FucpNac- (1-3) -b-D-GlcpNac- (1- |
| 48 | <i>Shigella dysenteriae</i><br>type 13 | 23079  | (S) -lac- (2-4) -+<br> <br>-3) -b-D-GlcpNac- (1-2) -a-L-Rhap- (1-3) -a-L-Rhap- (1-3) -b-D-GlcpNac- (1-<br>b-D-Glcp- (1-2) -+<br>     |

Abbreviations: Am, acetimidoyl; cetLys, N<sup>ε</sup>-(1-carboxyethyl)lysine; Fo, formyl; lac, 1-carboxyethyl (a lactic acid residue); 3-HOBut, 3-hydroxybutanoyl; 8eLeg, 5,7-diamino-3,5,7,9-tetradexy-L-glycero-D-manno-non-2-ulosonic (8-epilegionaminic) acid.

Supplemental Figure 1. Comparison of the sequences of the CRDs from human MGL (black) and rat mannose-binding protein (red), with residues inserted (blue) to create mutant QPDWG-HDRPY (Iobst and Drickamer, 2006). Residues identical to MGL in the region of the CRD containing the binding site are indicated with asterisks. Overall sequence identity is 34% and identity in the binding site region is 70%.

CPVNWVEHQDSCYWFSHSGMSWAEAEKYCQLKNAHLVVINSREEQNFVQKYLGSAYTWMGLSD  
AFSMGKKSGKKFFVTNHERMPFSKVKALCSELRGTVAIIPRNAEENKAIQE-VAKTSAFLGITD

--PEGAWKWVDGTDYATGFQNWKPGQPDDWQGHGLGGGEDCAHFHPDGRWNDDVCQRPYHWVCE  
EVTEGQFMYV--TGGRLTYSNWKKDQPDWYGHGLGGGEDCVHIVDNGLWNDSCQRPYTAVCE  
\*\*\* \*\*\*\*\* \*\*\*\*\* \* \* \*\*\*\*\* \*\*\*\*\* \*\*\*
